# Supplementary material for: Bracken: estimating species abundance in metagenomics data
Source: PeerJ Comput Sci. Author manuscript; Available in PMC 2025 Apr 23. (PMC12016282; doi:10.7717/peerj-cs.104)
Supplement: Supplementary Table 1 [file NIHMS2071674-supplement-Supplementary_Table_1.xlsx]

## Sheet: SuppTable1 Database sequences
Source	Sequence name	AC	Taxonomy ID
RefSeq	Acaryochloris marina MBIC11017 chromosome, complete genome	NC_009925.1	329726
RefSeq	Acaryochloris marina MBIC11017 plasmid pREB1, complete sequence	NC_009926.1	329726
RefSeq	Acaryochloris marina MBIC11017 plasmid pREB2, complete sequence	NC_009927.1	329726
RefSeq	Acaryochloris marina MBIC11017 plasmid pREB3, complete sequence	NC_009928.1	329726
RefSeq	Acaryochloris marina MBIC11017 plasmid pREB4, complete sequence	NC_009929.1	329726
RefSeq	Acaryochloris marina MBIC11017 plasmid pREB5, complete sequence	NC_009930.1	329726
RefSeq	Acaryochloris marina MBIC11017 plasmid pREB6, complete sequence	NC_009931.1	329726
RefSeq	Acaryochloris marina MBIC11017 plasmid pREB7, complete sequence	NC_009932.1	329726
RefSeq	Acaryochloris marina MBIC11017 plasmid pREB8, complete sequence	NC_009933.1	329726
RefSeq	Acaryochloris marina MBIC11017 plasmid pREB9, complete sequence	NC_009934.1	329726
RefSeq	Acetobacter pasteurianus 386B plasmid Apa386Bp1, complete sequence	NC_021976.1	1266844
RefSeq	Acetobacter pasteurianus 386B plasmid Apa386Bp4, complete sequence	NC_021977.1	1266844
RefSeq	Acetobacter pasteurianus 386B plasmid Apa386Bp6, complete sequence	NC_021978.1	1266844
RefSeq	Acetobacter pasteurianus 386B plasmid Apa386Bp7, complete sequence	NC_021979.1	1266844
RefSeq	Acetobacter pasteurianus 386B, complete genome	NC_021991.1	1266844
RefSeq	Acetobacter pasteurianus 386B plasmid Apa386Bp3, complete sequence	NC_021992.1	1266844
RefSeq	Acetobacter pasteurianus 386B plasmid Apa386Bp5, complete sequence	NC_021993.1	1266844
RefSeq	Acetobacter pasteurianus IFO 3283-01-42C plasmid pAPA42C_011, complete sequence	NC_017104.1	634458
RefSeq	Acetobacter pasteurianus IFO 3283-01-42C plasmid pAPA42C_020, complete sequence	NC_017105.1	634458
RefSeq	Acetobacter pasteurianus IFO 3283-01-42C plasmid pAPA42C_040, complete sequence	NC_017106.1	634458
RefSeq	Acetobacter pasteurianus IFO 3283-01-42C plasmid pAPA42C_050, complete sequence	NC_017107.1	634458
RefSeq	Acetobacter pasteurianus IFO 3283-01-42C, complete genome	NC_017150.1	634458
RefSeq	Acetobacter pasteurianus IFO 3283-01-42C plasmid pAPA42C_030, complete sequence	NC_017151.1	634458
RefSeq	Acetobacter pasteurianus IFO 3283-01-42C plasmid pAPA42C_060, complete sequence	NC_017152.1	634458
RefSeq	Acetobacter pasteurianus IFO 3283-01, complete genome	NC_013209.1	634452
RefSeq	Acetobacter pasteurianus IFO 3283-01 plasmid pAPA01-011, complete sequence	NC_013210.1	634452
RefSeq	Acetobacter pasteurianus IFO 3283-01 plasmid pAPA01-020, complete sequence	NC_013211.1	634452
RefSeq	Acetobacter pasteurianus IFO 3283-01 plasmid pAPA01-030, complete sequence	NC_013212.1	634452
RefSeq	Acetobacter pasteurianus IFO 3283-01 plasmid pAPA01-040, complete sequence	NC_013213.1	634452
RefSeq	Acetobacter pasteurianus IFO 3283-01 plasmid pAPA01-050, complete sequence	NC_013214.1	634452
RefSeq	Acetobacter pasteurianus IFO 3283-01 plasmid pAPA01-060, complete sequence	NC_013215.1	634452
RefSeq	Acetobacter pasteurianus IFO 3283-03, complete genome	NC_017100.1	634453
RefSeq	Acetobacter pasteurianus IFO 3283-03 plasmid pAPA03-010, complete sequence	NC_017101.1	634453
RefSeq	Acetobacter pasteurianus IFO 3283-03 plasmid pAPA03-060, complete sequence	NC_017109.1	634453
RefSeq	Acetobacter pasteurianus IFO 3283-03 plasmid pAPA03-020, complete sequence	NC_017118.1	634453
RefSeq	Acetobacter pasteurianus IFO 3283-03 plasmid pAPA03-030, complete sequence	NC_017119.1	634453
RefSeq	Acetobacter pasteurianus IFO 3283-03 plasmid pAPA03-050, complete sequence	NC_017120.1	634453
RefSeq	Acetobacter pasteurianus IFO 3283-03 plasmid pAPA03-040, complete sequence	NC_017142.1	634453
RefSeq	Acetobacter pasteurianus IFO 3283-07 plasmid pAPA07-030, complete sequence	NC_017110.1	634454
RefSeq	Acetobacter pasteurianus IFO 3283-07, complete genome	NC_017121.1	634454
RefSeq	Acetobacter pasteurianus IFO 3283-07 plasmid pAPA07-020, complete sequence	NC_017122.1	634454
RefSeq	Acetobacter pasteurianus IFO 3283-07 plasmid pAPA07-040, complete sequence	NC_017123.1	634454
RefSeq	Acetobacter pasteurianus IFO 3283-07 plasmid pAPA07-060, complete sequence	NC_017124.1	634454
RefSeq	Acetobacter pasteurianus IFO 3283-07 plasmid pAPA07-010, complete sequence	NC_017143.1	634454
RefSeq	Acetobacter pasteurianus IFO 3283-07 plasmid pAPA07-050, complete sequence	NC_017144.1	634454
RefSeq	Acetobacter pasteurianus IFO 3283-12, complete genome	NC_017108.1	634459
RefSeq	Acetobacter pasteurianus IFO 3283-12 plasmid pAPA12-020, complete sequence	NC_017113.1	634459
RefSeq	Acetobacter pasteurianus IFO 3283-12 plasmid pAPA12-030, complete sequence	NC_017114.1	634459
RefSeq	Acetobacter pasteurianus IFO 3283-12 plasmid pAPA12-040, complete sequence	NC_017115.1	634459
RefSeq	Acetobacter pasteurianus IFO 3283-12 plasmid pAPA12-050, complete sequence	NC_017116.1	634459
RefSeq	Acetobacter pasteurianus IFO 3283-12 plasmid pAPA12-014, complete sequence	NC_017136.1	634459
RefSeq	Acetobacter pasteurianus IFO 3283-12 plasmid pAPA12-060, complete sequence	NC_017137.1	634459
RefSeq	Acetobacter pasteurianus IFO 3283-22 plasmid pAPA22-010, complete sequence	NC_017117.1	634455
RefSeq	Acetobacter pasteurianus IFO 3283-22, complete genome	NC_017125.1	634455
RefSeq	Acetobacter pasteurianus IFO 3283-22 plasmid pAPA22-020, complete sequence	NC_017126.1	634455
RefSeq	Acetobacter pasteurianus IFO 3283-22 plasmid pAPA22-030, complete sequence	NC_017127.1	634455
RefSeq	Acetobacter pasteurianus IFO 3283-22 plasmid pAPA22-050, complete sequence	NC_017128.1	634455
RefSeq	Acetobacter pasteurianus IFO 3283-22 plasmid pAPA22-060, complete sequence	NC_017129.1	634455
RefSeq	Acetobacter pasteurianus IFO 3283-22 plasmid pAPA22-040, complete sequence	NC_017145.1	634455
RefSeq	Acetobacter pasteurianus IFO 3283-26 plasmid pAPA26-013, complete sequence	NC_017130.1	634456
RefSeq	Acetobacter pasteurianus IFO 3283-26 plasmid pAPA26-020, complete sequence	NC_017131.1	634456
RefSeq	Acetobacter pasteurianus IFO 3283-26 plasmid pAPA26-040, complete sequence	NC_017132.1	634456
RefSeq	Acetobacter pasteurianus IFO 3283-26 plasmid pAPA26-060, complete sequence	NC_017133.1	634456
RefSeq	Acetobacter pasteurianus IFO 3283-26, complete genome	NC_017146.1	634456
RefSeq	Acetobacter pasteurianus IFO 3283-26 plasmid pAPA26-030, complete sequence	NC_017147.1	634456
RefSeq	Acetobacter pasteurianus IFO 3283-26 plasmid pAPA26-050, complete sequence	NC_017148.1	634456
RefSeq	Acetobacter pasteurianus IFO 3283-32 plasmid pAPA32-040, complete sequence	NC_017102.1	634457
RefSeq	Acetobacter pasteurianus IFO 3283-32 plasmid pAPA32-050, complete sequence	NC_017103.1	634457
RefSeq	Acetobacter pasteurianus IFO 3283-32, complete genome	NC_017111.1	634457
RefSeq	Acetobacter pasteurianus IFO 3283-32 plasmid pAPA32-060, complete sequence	NC_017112.1	634457
RefSeq	Acetobacter pasteurianus IFO 3283-32 plasmid pAPA32-012, complete sequence	NC_017134.1	634457
RefSeq	Acetobacter pasteurianus IFO 3283-32 plasmid pAPA32-030, complete sequence	NC_017135.1	634457
RefSeq	Acetobacter pasteurianus IFO 3283-32 plasmid pAPA32-020, complete sequence	NC_017149.1	634457
RefSeq	Acetobacterium woodii DSM 1030 chromosome, complete genome	NC_016894.1	931626
RefSeq	Acetohalobium arabaticum DSM 5501 chromosome, complete genome	NC_014378.1	574087
RefSeq	complete chromosome Acholeplasma brassicae	NC_022549.1	61635
RefSeq	Acholeplasma laidlawii PG-8A chromosome, complete genome	NC_010163.1	441768
RefSeq	complete chromosome Acholeplasma palmae	NC_022538.1	1318466
RefSeq	Achromobacter xylosoxidans A8 chromosome, complete genome	NC_014640.1	762376
RefSeq	Achromobacter xylosoxidans A8 plasmid pA81, complete sequence	NC_014641.1	762376
RefSeq	Achromobacter xylosoxidans A8 plasmid pA82, complete sequence	NC_014642.1	762376
RefSeq	Achromobacter xylosoxidans NH44784-1996 complete genome	NC_021285.1	1167634
RefSeq	Acidaminococcus fermentans DSM 20731 chromosome, complete genome	NC_013740.1	591001
RefSeq	Acidaminococcus intestini RyC-MR95 chromosome, complete genome	NC_016077.1	568816
RefSeq	Acidianus hospitalis W1 chromosome, complete genome	NC_015518.1	933801
RefSeq	Acidilobus saccharovorans 345-15 chromosome, complete genome	NC_014374.1	666510
RefSeq	Acidimicrobidae bacterium YM16-304 DNA, complete genome	NC_020520.1	1313172
RefSeq	Acidimicrobium ferrooxidans DSM 10331 chromosome, complete genome	NC_013124.1	525909
RefSeq	Acidiphilium cryptum JF-5 plasmid pACRY01, complete sequence	NC_009467.1	349163
RefSeq	Acidiphilium cryptum JF-5 plasmid pACRY02, complete sequence	NC_009468.1	349163
RefSeq	Acidiphilium cryptum JF-5 plasmid pACRY03, complete sequence	NC_009469.1	349163
RefSeq	Acidiphilium cryptum JF-5 plasmid pACRY04, complete sequence	NC_009470.1	349163
RefSeq	Acidiphilium cryptum JF-5 plasmid pACRY05, complete sequence	NC_009471.1	349163
RefSeq	Acidiphilium cryptum JF-5 plasmid pACRY06, complete sequence	NC_009472.1	349163
RefSeq	Acidiphilium cryptum JF-5 plasmid pACRY07, complete sequence	NC_009473.1	349163
RefSeq	Acidiphilium cryptum JF-5 plasmid pACRY08, complete sequence	NC_009474.1	349163
RefSeq	Acidiphilium cryptum JF-5 chromosome, complete genome	NC_009484.1	349163
RefSeq	Acidiphilium multivorum AIU301 plasmid pACMV1, complete sequence	NC_015178.1	926570
RefSeq	Acidiphilium multivorum AIU301 plasmid pACMV3, complete sequence	NC_015179.1	926570
RefSeq	Acidiphilium multivorum AIU301 plasmid pACMV5, complete sequence	NC_015180.1	926570
RefSeq	Acidiphilium multivorum AIU301 plasmid pACMV6, complete sequence	NC_015181.1	926570
RefSeq	Acidiphilium multivorum AIU301 plasmid pACMV8, complete sequence	NC_015182.1	926570
RefSeq	Acidiphilium multivorum AIU301, complete genome	NC_015186.1	926570
RefSeq	Acidiphilium multivorum AIU301 plasmid pACMV2, complete sequence	NC_015187.1	926570
RefSeq	Acidiphilium multivorum AIU301 plasmid pACMV4, complete sequence	NC_015188.1	926570
RefSeq	Acidiphilium multivorum AIU301 plasmid pACMV7, complete sequence	NC_015189.1	926570
RefSeq	Acidithiobacillus caldus SM-1 chromosome, complete genome	NC_015850.1	990288
RefSeq	Acidithiobacillus caldus SM-1 megaplasmid, complete sequence	NC_015851.1	990288
RefSeq	Acidithiobacillus caldus SM-1 plasmid pLAtc1, complete sequence	NC_015852.1	990288
RefSeq	Acidithiobacillus caldus SM-1 plasmid pLAtc2, complete sequence	NC_015853.1	990288
RefSeq	Acidithiobacillus caldus SM-1 plasmid pLAtc3, complete sequence	NC_015854.1	990288
RefSeq	Acidithiobacillus ferrivorans SS3 chromosome, complete genome	NC_015942.1	743299
RefSeq	Acidithiobacillus ferrooxidans ATCC 23270 chromosome, complete genome	NC_011761.1	243159
RefSeq	Acidithiobacillus ferrooxidans ATCC 53993 chromosome, complete genome	NC_011206.1	380394
RefSeq	Granulicella tundricola plasmid pACIX901, complete sequence	NC_015057.1	1198114
RefSeq	Granulicella tundricola plasmid pACIX903, complete sequence	NC_015058.1	1198114
RefSeq	Granulicella tundricola plasmid pACIX904, complete sequence	NC_015059.1	1198114
RefSeq	Granulicella tundricola plasmid pACIX905, complete sequence	NC_015060.1	1198114
RefSeq	Granulicella tundricola chromosome, complete genome	NC_015064.1	1198114
RefSeq	Granulicella tundricola plasmid pACIX902, complete sequence	NC_015065.1	1198114
RefSeq	Acidobacterium capsulatum ATCC 51196 chromosome, complete genome	NC_012483.1	240015
RefSeq	Acidothermus cellulolyticus 11B chromosome, complete genome	NC_008578.1	351607
RefSeq	Acidovorax sp. JS42 plasmid pAOVO01, complete sequence	NC_008765.1	232721
RefSeq	Acidovorax sp. JS42 plasmid pAOVO02, complete sequence	NC_008766.1	232721
RefSeq	Acidovorax sp. JS42 chromosome, complete genome	NC_008782.1	232721
RefSeq	Acidovorax sp. KKS102 chromosome, complete genome	NC_018708.1	358220
RefSeq	Acidovorax avenae subsp. avenae ATCC 19860 chromosome, complete genome	NC_015138.1	643561
RefSeq	Acidovorax citrulli AAC00-1 chromosome, complete genome	NC_008752.1	397945
RefSeq	Acidovorax ebreus TPSY chromosome, complete genome	NC_011992.1	535289
RefSeq	Aciduliprofundum sp. MAR08-339, complete genome	NC_019942.1	673860
RefSeq	Aciduliprofundum boonei T469 chromosome, complete genome	NC_013926.1	439481
RefSeq	Acinetobacter sp. ADP1 chromosome, complete genome	NC_005966.1	62977
RefSeq	Acinetobacter baumannii 1656-2 chromosome, complete genome	NC_017162.1	696749
RefSeq	Acinetobacter baumannii 1656-2 plasmid ABKp1, complete sequence	NC_017163.1	696749
RefSeq	Acinetobacter baumannii 1656-2 plasmid ABKp2, complete sequence	NC_017164.1	696749
RefSeq	Acinetobacter baumannii AB0057 plasmid pAB0057, complete sequence	NC_011585.1	480119
RefSeq	Acinetobacter baumannii AB0057 chromosome, complete genome	NC_011586.1	480119
RefSeq	Acinetobacter baumannii AB307-0294, complete genome	NC_011595.1	557600
RefSeq	Acinetobacter baumannii ACICU plasmid pACICU1, complete sequence	NC_010605.1	405416
RefSeq	Acinetobacter baumannii ACICU plasmid pACICU2, complete sequence	NC_010606.1	405416
RefSeq	Acinetobacter baumannii ACICU chromosome, complete genome	NC_010611.1	405416
RefSeq	Acinetobacter baumannii ATCC 17978 plasmid pAB1, complete sequence	NC_009083.1	400667
RefSeq	Acinetobacter baumannii ATCC 17978 plasmid pAB2, complete sequence	NC_009084.1	400667
RefSeq	Acinetobacter baumannii AYE plasmid p1ABAYE, complete sequence	NC_010401.1	509173
RefSeq	Acinetobacter baumannii AYE plasmid p2ABAYE, complete sequence	NC_010402.1	509173
RefSeq	Acinetobacter baumannii AYE plasmid p4ABAYE, complete sequence	NC_010403.1	509173
RefSeq	Acinetobacter baumannii AYE plasmid p3ABAYE, complete sequence	NC_010404.1	509173
RefSeq	Acinetobacter baumannii AYE chromosome, complete genome	NC_010410.1	509173
RefSeq	Acinetobacter baumannii BJAB07104, complete genome	NC_021726.1	1096995
RefSeq	Acinetobacter baumannii BJAB07104 plasmid p1BJAB07104, complete sequence	NC_021727.1	1096995
RefSeq	Acinetobacter baumannii BJAB07104 plasmid p2BJAB07104, complete sequence	NC_021728.1	1096995
RefSeq	Acinetobacter baumannii BJAB0715, complete genome	NC_021733.1	1096996
RefSeq	Acinetobacter baumannii BJAB0715 plasmid pBJAB0715, complete sequence	NC_021734.1	1096996
RefSeq	Acinetobacter baumannii BJAB0868, complete genome	NC_021729.1	1096997
RefSeq	Acinetobacter baumannii BJAB0868 plasmid p1BJAB0868, complete sequence	NC_021730.1	1096997
RefSeq	Acinetobacter baumannii BJAB0868 plasmid p2BJAB0868, complete sequence	NC_021731.1	1096997
RefSeq	Acinetobacter baumannii BJAB0868 plasmid p3BJAB0868, complete sequence	NC_021732.1	1096997
RefSeq	Acinetobacter baumannii D1279779 plasmid pD1279779, complete sequence	NC_020525.1	945556
RefSeq	Acinetobacter baumannii MDR-TJ chromosome, complete genome	NC_017847.1	889738
RefSeq	Acinetobacter baumannii MDR-TJ plasmid pABTJ1, complete sequence	NC_017848.1	889738
RefSeq	Acinetobacter baumannii MDR-TJ plasmid pABTJ2, complete sequence	NC_020524.1	889738
RefSeq	Acinetobacter baumannii MDR-ZJ06 chromosome, complete genome	NC_017171.1	497978
RefSeq	Acinetobacter baumannii MDR-ZJ06 plasmid pMDR-ZJ06, complete sequence	NC_017172.1	497978
RefSeq	Acinetobacter baumannii TYTH-1 chromosome, complete genome	NC_018706.1	1100841
RefSeq	Acinetobacter baumannii ZW85-1, complete genome	NC_023028.1	1400867
RefSeq	Acinetobacter baumannii ZW85-1 plasmid ZW85p2, complete sequence	NC_023031.1	1400867
RefSeq	Acinetobacter calcoaceticus PHEA-2 chromosome, complete genome	NC_016603.1	871585
RefSeq	Acinetobacter oleivorans DR1 chromosome, complete genome	NC_014259.1	436717
RefSeq	Actinobacillus pleuropneumoniae serovar 3 str. JL03 chromosome, complete genome	NC_010278.1	434271
RefSeq	Actinobacillus pleuropneumoniae serovar 5b str. L20 chromosome, complete genome	NC_009053.1	416269
RefSeq	Actinobacillus pleuropneumoniae serovar 7 str. AP76, complete genome	NC_010939.1	537457
RefSeq	Actinobacillus pleuropneumoniae serovar 7 str. AP76 plasmid APP7_C, complete sequence	NC_010940.1	537457
RefSeq	Actinobacillus pleuropneumoniae serovar 7 str. AP76 plasmid ABB7_B, complete sequence	NC_010941.1	537457
RefSeq	Actinobacillus pleuropneumoniae serovar 7 str. AP76 plasmid APP7_A, complete sequence	NC_010942.1	537457
RefSeq	Actinobacillus succinogenes 130Z chromosome, complete genome	NC_009655.1	339671
RefSeq	Actinobacillus suis H91-0380 chromosome, complete genome	NC_018690.1	696748
RefSeq	Actinoplanes sp. N902-109, complete genome	NC_021191.1	649831
RefSeq	Actinoplanes sp. SE50/110 chromosome, complete genome	NC_017803.1	134676
RefSeq	Actinoplanes friuliensis DSM 7358, complete genome	NC_022657.1	1246995
RefSeq	Actinoplanes missouriensis 431, complete genome	NC_017093.1	512565
RefSeq	Actinosynnema mirum DSM 43827 chromosome, complete genome	NC_013093.1	446462
RefSeq	Adlercreutzia equolifaciens DSM 19450 DNA, complete genome	NC_022567.1	1384484
RefSeq	Advenella kashmirensis WT001 chromosome, complete genome	NC_017964.1	1036672
RefSeq	Advenella kashmirensis WT001 plasmid pWTk445, complete sequence	NC_017965.1	1036672
RefSeq	Aequorivita sublithincola DSM 14238 chromosome, complete genome	NC_018013.1	746697
RefSeq	Aerococcus urinae ACS-120-V-Col10a chromosome, complete genome	NC_015278.1	866775
RefSeq	Aeromonas hydrophila subsp. hydrophila ATCC 7966 chromosome, complete genome	NC_008570.1	380703
RefSeq	Aeromonas hydrophila ML09-119, complete genome	NC_021290.1	1288394
RefSeq	Aeromonas salmonicida salmonicida A449 plasmid pAsa1, complete sequence	NC_004923.1	382245
RefSeq	Aeromonas salmonicida salmonicida A449 plasmid pAsa3, complete sequence	NC_004924.1	382245
RefSeq	Aeromonas salmonicida salmonicida A449 plasmid pAsa2, complete sequence	NC_004925.1	382245
RefSeq	Aeromonas salmonicida subsp. salmonicida A449, complete genome	NC_009348.1	382245
RefSeq	Aeromonas salmonicida subsp. salmonicida A449 plasmid 4, complete sequence	NC_009349.1	382245
RefSeq	Aeromonas salmonicida subsp. salmonicida A449 plasmid 5, complete sequence	NC_009350.1	382245
RefSeq	Aeromonas veronii B565 chromosome, complete genome	NC_015424.1	998088
RefSeq	Aggregatibacter actinomycetemcomitans ANH9381 chromosome, complete genome	NC_016513.1	754507
RefSeq	Aggregatibacter phage S1249, complete sequence	NC_013597.1	683735
RefSeq	Aggregatibacter actinomycetemcomitans D11S-1 plasmid S57, complete sequence	NC_014629.1	668336
RefSeq	Aggregatibacter actinomycetemcomitans D7S-1 chromosome, complete genome	NC_017846.1	694569
RefSeq	Aggregatibacter aphrophilus NJ8700 chromosome, complete genome	NC_012913.1	634176
RefSeq	Agrobacterium sp. H13-3 chromosome, complete genome	NC_015183.1	861208
RefSeq	Agrobacterium sp. H13-3 plasmid pAspH13-3a, complete sequence	NC_015184.1	861208
RefSeq	Agrobacterium sp. H13-3 chromosome linear, complete sequence	NC_015508.1	861208
RefSeq	Agrobacterium fabrum str. C58 chromosome circular, complete sequence	NC_003062.2	176299
RefSeq	Agrobacterium fabrum str. C58 chromosome linear, complete sequence	NC_003063.2	176299
RefSeq	Agrobacterium fabrum str. C58 plasmid At, complete sequence	NC_003064.2	176299
RefSeq	Agrobacterium fabrum str. C58 plasmid Ti, complete sequence	NC_003065.3	176299
RefSeq	Agrobacterium radiobacter K84 chromosome 2, complete sequence	NC_011983.1	311403
RefSeq	Agrobacterium radiobacter K84 chromosome 1, complete sequence	NC_011985.1	311403
RefSeq	Agrobacterium radiobacter K84 plasmid pAtK84c, complete sequence	NC_011987.1	311403
RefSeq	Agrobacterium radiobacter K84 plasmid pAtK84b, complete sequence	NC_011990.1	311403
RefSeq	Agrobacterium radiobacter K84 plasmid pAgK84, complete sequence	NC_011994.1	311403
RefSeq	Agrobacterium vitis S4 plasmid pAtS4e, complete sequence	NC_011981.1	311402
RefSeq	Agrobacterium vitis S4 plasmid pTiS4, complete sequence	NC_011982.1	311402
RefSeq	Agrobacterium vitis S4 plasmid pAtS4c, complete sequence	NC_011984.1	311402
RefSeq	Agrobacterium vitis S4 plasmid pAtS4a, complete sequence	NC_011986.1	311402
RefSeq	Agrobacterium vitis S4 chromosome 2, complete sequence	NC_011988.1	311402
RefSeq	Agrobacterium vitis S4 chromosome 1, complete sequence	NC_011989.1	311402
RefSeq	Agrobacterium vitis S4 plasmid pAtS4b, complete sequence	NC_011991.1	311402
RefSeq	Agromonas oligotrophica S58 DNA, complete genome	NC_020453.1	1245469
RefSeq	Akkermansia muciniphila ATCC BAA-835 chromosome, complete genome	NC_010655.1	349741
RefSeq	Alcanivorax borkumensis SK2 chromosome, complete genome	NC_008260.1	393595
RefSeq	Alcanivorax dieselolei B5 chromosome, complete genome	NC_018691.1	930169
RefSeq	Alicycliphilus denitrificans BC plasmid pALIDE01, complete sequence	NC_014908.1	596153
RefSeq	Alicycliphilus denitrificans BC chromosome, complete genome	NC_014910.1	596153
RefSeq	Alicycliphilus denitrificans BC plasmid pALIDE02, complete sequence	NC_014911.1	596153
RefSeq	Alicycliphilus denitrificans K601 chromosome, complete genome	NC_015422.1	596154
RefSeq	Alicycliphilus denitrificans K601 plasmid pALIDE201, complete sequence	NC_015423.1	596154
RefSeq	Alicyclobacillus acidocaldarius subsp. acidocaldarius DSM 446 chromosome, complete genome	NC_013205.1	521098
RefSeq	Alicyclobacillus acidocaldarius subsp. acidocaldarius DSM 446 plasmid pAACI01, complete sequence	NC_013206.1	521098
RefSeq	Alicyclobacillus acidocaldarius subsp. acidocaldarius DSM 446 plasmid pAACI02, complete sequence	NC_013207.1	521098
RefSeq	Alicyclobacillus acidocaldarius subsp. acidocaldarius DSM 446 plasmid pAACI03, complete sequence	NC_013208.1	521098
RefSeq	Alicyclobacillus acidocaldarius subsp. acidocaldarius Tc-4-1 chromosome, complete genome	NC_017167.1	1048834
RefSeq	Aliivibrio salmonicida LFI1238 plasmid pVSAL840, complete sequence	NC_011311.1	316275
RefSeq	Aliivibrio salmonicida LFI1238 chromosome chromosome 1, complete sequence	NC_011312.1	316275
RefSeq	Aliivibrio salmonicida LFI1238 chromosome 2, complete sequence	NC_011313.1	316275
RefSeq	Aliivibrio salmonicida LFI1238 plasmid pVSAL320, complete sequence	NC_011314.1	316275
RefSeq	Aliivibrio salmonicida LFI1238 plasmid pVSAL54, complete sequence	NC_011315.1	316275
RefSeq	Aliivibrio salmonicida LFI1238 plasmid pVSAL43, complete sequence	NC_011316.1	316275
RefSeq	Alistipes finegoldii DSM 17242 chromosome, complete genome	NC_018011.1	679935
RefSeq	Alistipes shahii WAL 8301 draft genome	NC_021030.1	717959
RefSeq	Alkalilimnicola ehrlichii MLHE-1 chromosome, complete genome	NC_008340.1	187272
RefSeq	Alkaliphilus metalliredigens QYMF chromosome, complete genome	NC_009633.1	293826
RefSeq	Alkaliphilus oremlandii OhILAs chromosome, complete genome	NC_009922.1	350688
RefSeq	Allochromatium vinosum DSM 180 chromosome, complete genome	NC_013851.1	572477
RefSeq	Allochromatium vinosum DSM 180 plasmid pALVIN01, complete sequence	NC_013852.1	572477
RefSeq	Allochromatium vinosum DSM 180 plasmid pALVIN02, complete sequence	NC_013862.1	572477
RefSeq	Alteromonas sp. SN2 chromosome, complete genome	NC_015554.1	715451
RefSeq	Alteromonas macleodii ATCC 27126 chromosome, complete genome	NC_018632.1	529120
RefSeq	Alteromonas macleodii AltDE1 chromosome, complete genome	NC_019393.1	1004786
RefSeq	Alteromonas macleodii AltDE1 plasmid pAMDE1-300, complete sequence	NC_019394.1	1004786
RefSeq	Alteromonas macleodii str. 'Aegean Sea MED64', complete genome	NC_023045.1	1300254
RefSeq	Alteromonas macleodii str. 'Balearic Sea AD45' chromosome, complete genome	NC_018679.1	1004787
RefSeq	Alteromonas macleodii str. 'Balearic Sea AD45' plasmid pAMBAS45, complete sequence	NC_018680.1	1004787
RefSeq	Alteromonas macleodii str. 'Black Sea 11' chromosome, complete genome	NC_018692.1	1004785
RefSeq	Alteromonas macleodii str. 'Deep ecotype', complete genome	NC_011138.3	1774373
RefSeq	Alteromonas macleodii str. 'English Channel 673' chromosome, complete genome	NC_018678.1	1004788
RefSeq	Alteromonas macleodii str. 'Ionian Sea U7', complete genome	NC_021717.1	1300256
RefSeq	Alteromonas macleodii str. 'Ionian Sea U8', complete genome	NC_021712.1	1300257
RefSeq	Alteromonas macleodii str. 'Ionian Sea UM4b', complete genome	NC_021714.1	1300259
RefSeq	Alteromonas macleodii str. 'Ionian Sea UM7', complete genome	NC_021713.1	1300258
RefSeq	Alteromonas macleodii str. 'Ionian Sea UM7' plasmid, complete sequence	NC_021718.1	1300258
RefSeq	Aminobacterium colombiense DSM 12261 chromosome, complete genome	NC_014011.1	572547
RefSeq	Ammonifex degensii KC4 chromosome, complete genome	NC_013385.1	429009
RefSeq	Ammonifex degensii KC4 plasmid pADEG01, complete sequence	NC_013386.1	429009
RefSeq	Amphibacillus xylanus NBRC 15112, complete genome	NC_018704.1	698758
RefSeq	Amycolatopsis mediterranei RB, complete genome	NC_022116.1	1221524
RefSeq	Amycolatopsis mediterranei S699 chromosome, complete genome	NC_017186.1	713604
RefSeq	Amycolatopsis mediterranei S699 chromosome, complete genome	NC_018266.1	713604
RefSeq	Amycolatopsis mediterranei U32 chromosome, complete genome	NC_014318.1	749927
RefSeq	Amycolatopsis orientalis HCCB10007, complete genome	NC_021252.1	1156913
RefSeq	Amycolatopsis orientalis HCCB10007 plasmid pXL100, complete sequence	NC_023497.1	1156913
RefSeq	Amycolicicoccus subflavus DQS3-9A1 plasmid pAS9A-1, complete sequence	NC_015560.1	443218
RefSeq	Amycolicicoccus subflavus DQS3-9A1 plasmid pAS9A-2, complete sequence	NC_015561.1	443218
RefSeq	Amycolicicoccus subflavus DQS3-9A1 chromosome, complete genome	NC_015564.1	443218
RefSeq	Anabaena sp. 90 chromosome chANA01, complete sequence	NC_019427.1	46234
RefSeq	Anabaena sp. 90 plasmid pANA01, complete sequence	NC_019428.1	46234
RefSeq	Anabaena sp. 90 plasmid pANA02, complete sequence	NC_019429.1	46234
RefSeq	Anabaena sp. 90 chromosome chANA02, complete sequence	NC_019439.1	46234
RefSeq	Anabaena sp. 90 plasmid pANA03, complete sequence	NC_019440.1	46234
RefSeq	Anabaena cylindrica PCC 7122, complete genome	NC_019771.1	272123
RefSeq	Anabaena cylindrica PCC 7122 plasmid pANACY.01, complete sequence	NC_019772.1	272123
RefSeq	Anabaena cylindrica PCC 7122 plasmid pANACY.03, complete sequence	NC_019773.1	272123
RefSeq	Anabaena cylindrica PCC 7122 plasmid pANACY.04, complete sequence	NC_019774.1	272123
RefSeq	Anabaena cylindrica PCC 7122 plasmid pANACY.06, complete sequence	NC_019775.1	272123
RefSeq	Anabaena cylindrica PCC 7122 plasmid pANACY.05, complete sequence	NC_020056.1	272123
RefSeq	Anabaena cylindrica PCC 7122 plasmid pANACY.02, complete sequence	NC_020157.1	272123
RefSeq	Anabaena variabilis ATCC 29413 plasmid A, complete sequence	NC_007410.1	240292
RefSeq	Anabaena variabilis ATCC 29413 plasmid B, complete sequence	NC_007411.1	240292
RefSeq	Anabaena variabilis ATCC 29413 plasmid C, complete sequence	NC_007412.1	240292
RefSeq	Anabaena variabilis ATCC 29413 incision element, complete genome	NC_014000.1	240292
RefSeq	Anaerobaculum mobile DSM 13181 chromosome, complete genome	NC_018024.1	891968
RefSeq	Anaerococcus prevotii DSM 20548 plasmid pAPRE01, complete sequence	NC_013164.1	525919
RefSeq	Anaerococcus prevotii DSM 20548 chromosome, complete genome	NC_013171.1	525919
RefSeq	Anaerolinea thermophila UNI-1, complete genome	NC_014960.1	926569
RefSeq	Anaeromyxobacter sp. Fw109-5 chromosome, complete genome	NC_009675.1	404589
RefSeq	Anaeromyxobacter sp. K chromosome, complete genome	NC_011145.1	447217
RefSeq	Anaeromyxobacter dehalogenans 2CP-1 chromosome, complete genome	NC_011891.1	455488
RefSeq	Anaeromyxobacter dehalogenans 2CP-C chromosome, complete genome	NC_007760.1	290397
RefSeq	Anaplasma centrale str. Israel chromosome, complete genome	NC_013532.1	574556
RefSeq	Anaplasma marginale str. Dawn genome	NC_022760.1	1412841
RefSeq	Anaplasma marginale str. Florida, complete genome	NC_012026.1	320483
RefSeq	Anaplasma marginale str. Gypsy Plains genome	NC_022784.1	1412840
RefSeq	Anaplasma marginale str. St. Maries chromosome, complete genome	NC_004842.2	234826
RefSeq	Anaplasma phagocytophilum str. Dog2 genome	NC_021881.1	1184254
RefSeq	Anaplasma phagocytophilum str. HZ2, complete genome	NC_021879.1	1184253
RefSeq	Anaplasma phagocytophilum HZ, complete genome	NC_007797.1	212042
RefSeq	Anaplasma phagocytophilum str. JM, complete genome	NC_021880.1	1173064
RefSeq	Anoxybacillus flavithermus WK1 chromosome, complete genome	NC_011567.1	491915
RefSeq	Aquifex aeolicus VF5 chromosome, complete genome	NC_000918.1	224324
RefSeq	Aquifex aeolicus VF5 plasmid ece1, complete sequence	NC_001880.1	224324
RefSeq	Arcanobacterium haemolyticum DSM 20595 chromosome, complete genome	NC_014218.1	644284
RefSeq	Archaeoglobus fulgidus DSM 4304 chromosome, complete genome	NC_000917.1	224325
RefSeq	Archaeoglobus profundus DSM 5631 chromosome, complete genome	NC_013741.1	572546
RefSeq	Archaeoglobus profundus DSM 5631 plasmid pArcpr01, complete sequence	NC_013742.1	572546
RefSeq	Archaeoglobus sulfaticallidus PM70-1, complete genome	NC_021169.1	387631
RefSeq	Archaeoglobus veneficus SNP6 chromosome, complete genome	NC_015320.1	693661
RefSeq	Arcobacter sp. L, complete genome	NC_017192.1	944547
RefSeq	Arcobacter sp. L plasmid pABL, complete sequence	NC_017193.1	944547
RefSeq	Arcobacter butzleri 7h1h, complete genome	NC_021878.1	1036172
RefSeq	Arcobacter butzleri ED-1, complete genome	NC_017187.1	944546
RefSeq	Arcobacter butzleri RM4018 chromosome, complete genome	NC_009850.1	367737
RefSeq	Arcobacter nitrofigilis DSM 7299 chromosome, complete genome	NC_014166.1	572480
RefSeq	Aromatoleum aromaticum EbN1 chromosome, complete genome	NC_006513.1	76114
RefSeq	Azoarcus sp. EbN1 plasmid 1, complete sequence	NC_006823.1	76114
RefSeq	Azoarcus sp. EbN1 plasmid 2, complete sequence	NC_006824.1	76114
RefSeq	Arthrobacter sp. FB24 plasmid 1, complete sequence	NC_008537.1	290399
RefSeq	Arthrobacter sp. FB24 plasmid 2, complete sequence	NC_008538.1	290399
RefSeq	Arthrobacter sp. FB24 plasmid 3, complete sequence	NC_008539.1	290399
RefSeq	Arthrobacter sp. FB24, complete sequence	NC_008541.1	290399
RefSeq	Arthrobacter sp. Rue61a plasmid pAL1, complete sequence	NC_009453.1	1118963
RefSeq	Arthrobacter sp. Rue61a chromosome, complete genome	NC_018531.1	1118963
RefSeq	Arthrobacter sp. Rue61a plasmid p232, complete sequence	NC_018532.1	1118963
RefSeq	Arthrobacter arilaitensis Re117 plasmid pRE117-2, complete sequence	NC_014548.1	861360
RefSeq	Arthrobacter arilaitensis Re117 plasmid pRE117-1, complete sequence	NC_014549.1	861360
RefSeq	Arthrobacter arilaitensis Re117 chromosome, complete genome	NC_014550.1	861360
RefSeq	Arthrobacter aurescens TC1, complete genome	NC_008711.1	290340
RefSeq	Arthrobacter aurescens TC1 plasmid TC1, complete sequence	NC_008712.1	290340
RefSeq	Arthrobacter aurescens TC1 plasmid TC2, complete sequence	NC_008713.1	290340
RefSeq	Arthrobacter chlorophenolicus A6 plasmid pACHL01, complete sequence	NC_011879.1	452863
RefSeq	Arthrobacter chlorophenolicus A6 plasmid pACHL02, complete sequence	NC_011881.1	452863
RefSeq	Arthrobacter chlorophenolicus A6 chromosome, complete genome	NC_011886.1	452863
RefSeq	Arthrobacter phenanthrenivorans Sphe3 chromosome, complete genome	NC_015145.1	930171
RefSeq	Arthrobacter phenanthrenivorans Sphe3 plasmid pASPHE301, complete sequence	NC_015146.1	930171
RefSeq	Arthrobacter phenanthrenivorans Sphe3 plasmid pASPHE302, complete sequence	NC_015147.1	930171
RefSeq	Arthrospira platensis NIES-39, complete genome, *** SEQUENCING IN PROGRESS ***	NC_016640.1	696747
RefSeq	Aster yellows witches'-broom phytoplasma AYWB, complete genome	NC_007716.1	322098
RefSeq	Aster yellows witches'-broom phytoplasma AYWB plasmid pAYWB-I, complete sequence	NC_007717.1	322098
RefSeq	Aster yellows witches'-broom phytoplasma AYWB plasmid pAYWB-II, complete sequence	NC_007718.1	322098
RefSeq	Aster yellows witches'-broom phytoplasma AYWB plasmid pAYWB-III, complete sequence	NC_007719.1	322098
RefSeq	Aster yellows witches'-broom phytoplasma AYWB plasmid pAYWB-IV, complete sequence	NC_007720.1	322098
RefSeq	Asticcacaulis excentricus CB 48 chromosome 1, complete sequence	NC_014816.1	573065
RefSeq	Asticcacaulis excentricus CB 48 chromosome 2, complete sequence	NC_014817.1	573065
RefSeq	Asticcacaulis excentricus CB 48 plasmid pASTEX01, complete sequence	NC_014818.1	573065
RefSeq	Asticcacaulis excentricus CB 48 plasmid pASTEX02, complete sequence	NC_014819.1	573065
RefSeq	Atopobium parvulum DSM 20469 chromosome, complete genome	NC_013203.1	521095
RefSeq	Azoarcus sp. BH72 chromosome, complete genome	NC_008702.1	62928
RefSeq	Azoarcus sp. KH32C DNA, complete genome	NC_020516.1	748247
RefSeq	Azoarcus sp. KH32C plasmid pAZKH DNA, complete genome	NC_020548.1	748247
RefSeq	Azorhizobium caulinodans ORS 571 chromosome, complete genome	NC_009937.1	438753
RefSeq	Azospirillum sp. B510 chromosome, complete genome	NC_013854.1	137722
RefSeq	Azospirillum sp. B510 plasmid pAB510a, complete sequence	NC_013855.1	137722
RefSeq	Azospirillum sp. B510 plasmid pAB510b, complete sequence	NC_013856.1	137722
RefSeq	Azospirillum sp. B510 plasmid pAB510c, complete sequence	NC_013857.1	137722
RefSeq	Azospirillum sp. B510 plasmid pAB510d, complete sequence	NC_013858.1	137722
RefSeq	Azospirillum sp. B510 plasmid pAB510e, complete sequence	NC_013859.1	137722
RefSeq	Azospirillum sp. B510 plasmid pAB510f, complete sequence	NC_013860.1	137722
RefSeq	Azospirillum brasilense Sp245 plasmid AZOBR_p1, complete sequence	NC_016594.1	1064539
RefSeq	Azospirillum brasilense Sp245 plasmid AZOBR_p3, complete sequence	NC_016595.1	1064539
RefSeq	Azospirillum brasilense Sp245 plasmid AZOBR_p4, complete sequence	NC_016596.1	1064539
RefSeq	Azospirillum brasilense Sp245 plasmid AZOBR_p6, complete sequence	NC_016597.1	1064539
RefSeq	Azospirillum brasilense Sp245, complete genome	NC_016617.1	1064539
RefSeq	Azospirillum brasilense Sp245 plasmid AZOBR_p2, complete sequence	NC_016618.1	1064539
RefSeq	Azospirillum brasilense Sp245 plasmid AZOBR_p5, complete sequence	NC_016619.1	1064539
RefSeq	Azospirillum lipoferum 4B plasmid AZO_p1, complete sequence	NC_016585.1	862719
RefSeq	Azospirillum lipoferum 4B plasmid AZO_p2, complete sequence	NC_016586.1	862719
RefSeq	Azospirillum lipoferum 4B plasmid AZO_p4, complete sequence	NC_016587.1	862719
RefSeq	Azospirillum lipoferum 4B plasmid AZO_p6, complete sequence	NC_016588.1	862719
RefSeq	Azospirillum lipoferum 4B, complete genome	NC_016622.1	862719
RefSeq	Azospirillum lipoferum 4B plasmid AZO_p3, complete sequence	NC_016623.1	862719
RefSeq	Azospirillum lipoferum 4B plasmid AZO_p5, complete sequence	NC_016624.1	862719
RefSeq	Azotobacter vinelandii CA6, complete genome	NC_021150.1	1283331
RefSeq	Azotobacter vinelandii CA, complete genome	NC_021149.1	1283330
RefSeq	Azotobacter vinelandii DJ chromosome, complete genome	NC_012560.1	322710
RefSeq	Bacillus sp. 1NLA3E, complete genome	NC_021171.1	666686
RefSeq	Bacillus sp. JS chromosome, complete genome	NC_017743.1	1127744
RefSeq	Bacillus amyloliquefaciens CC178, complete genome	NC_022653.1	1412898
RefSeq	Bacillus amyloliquefaciens DSM 7, complete genome	NC_014551.1	692420
RefSeq	Bacillus amyloliquefaciens FZB42, complete genome	NC_009725.1	326423
RefSeq	Bacillus amyloliquefaciens IT-45, complete genome	NC_020272.1	1091041
RefSeq	Bacillus amyloliquefaciens IT-45 plasmid pBA45-1, whole genome shotgun sequence	NC_020273.1	1091041
RefSeq	Bacillus amyloliquefaciens LFB112, complete genome	NC_023073.1	1415165
RefSeq	Bacillus amyloliquefaciens LL3 plasmid pMC1, complete sequence	NC_017189.1	1001582
RefSeq	Bacillus amyloliquefaciens LL3 chromosome, complete genome	NC_017190.1	1001582
RefSeq	Bacillus amyloliquefaciens TA208 chromosome, complete genome	NC_017188.1	999891
RefSeq	Bacillus amyloliquefaciens XH7 chromosome, complete genome	NC_017191.1	1034836
RefSeq	Bacillus amyloliquefaciens Y2 chromosome, complete genome	NC_017912.1	1126211
RefSeq	Bacillus amyloliquefaciens subsp. plantarum AS43.3 chromosome, complete genome	NC_019842.1	1225788
RefSeq	Bacillus amyloliquefaciens subsp. plantarum CAU B946, complete genome	NC_016784.1	1114958
RefSeq	Bacillus amyloliquefaciens subsp. plantarum NAU-B3, complete genome	NC_022530.1	1385727
RefSeq	Bacillus amyloliquefaciens subsp. plantarum NAU-B3 plasmid pBamNAU-B3a	NC_022531.1	1385727
RefSeq	Bacillus amyloliquefaciens subsp. plantarum UCMB5033, complete genome	NC_022075.1	1338518
RefSeq	Bacillus amyloliquefaciens subsp. plantarum UCMB5036 complete genome	NC_020410.1	1150475
RefSeq	Bacillus amyloliquefaciens subsp. plantarum UCMB5113, complete genome	NC_022081.1	1150476
RefSeq	Bacillus amyloliquefaciens subsp. plantarum YAU B9601-Y2, complete genome	NC_017061.1	1155777
RefSeq	Bacillus anthracis str. A0248 plasmid pXO2, complete sequence	NC_012655.1	592021
RefSeq	Bacillus anthracis str. A0248 plasmid pXO1, complete sequence	NC_012656.1	592021
RefSeq	Bacillus anthracis str. A0248, complete genome	NC_012659.1	592021
RefSeq	Bacillus anthracis str. Ames chromosome, complete genome	NC_003997.3	198094
RefSeq	Bacillus anthracis str. CDC 684 plasmid pX02, complete sequence	NC_012577.1	568206
RefSeq	Bacillus anthracis str. CDC 684 plasmid pX01, complete sequence	NC_012579.1	568206
RefSeq	Bacillus anthracis str. CDC 684 chromosome, complete genome	NC_012581.1	568206
RefSeq	Bacillus anthracis str. H9401 plasmid BAP1, complete sequence	NC_017726.1	768494
RefSeq	Bacillus anthracis str. H9401 plasmid BAP2, complete sequence	NC_017727.1	768494
RefSeq	Bacillus anthracis str. H9401 chromosome, complete genome	NC_017729.1	768494
RefSeq	Bacillus anthracis str. Sterne chromosome, complete genome	NC_005945.1	260799
RefSeq	Bacillus anthracis str. 'Ames Ancestor' plasmid pXO1, complete sequence	NC_007322.2	261594
RefSeq	Bacillus anthracis str. 'Ames Ancestor' plasmid pXO2, complete sequence	NC_007323.3	261594
RefSeq	Bacillus anthracis str. 'Ames Ancestor' chromosome, complete genome	NC_007530.2	261594
RefSeq	Bacillus atrophaeus 1942 chromosome, complete genome	NC_014639.1	720555
RefSeq	Bacillus cellulosilyticus DSM 2522 chromosome, complete genome	NC_014829.1	649639
RefSeq	Bacillus cereus 03BB102, complete genome	NC_012472.1	572264
RefSeq	Bacillus cereus 03BB102 plasmid p03BB102_179, complete sequence	NC_012473.1	572264
RefSeq	Bacillus cereus AH187 plasmid pAH187_12, complete sequence	NC_011654.1	405534
RefSeq	Bacillus cereus AH187 plasmid pAH187_270, complete sequence	NC_011655.1	405534
RefSeq	Bacillus cereus AH187 plasmid pAH187_45, complete sequence	NC_011656.1	405534
RefSeq	Bacillus cereus AH187 plasmid pAH187_3, complete sequence	NC_011657.1	405534
RefSeq	Bacillus cereus AH187 chromosome, complete genome	NC_011658.1	405534
RefSeq	Bacillus cereus AH820 plasmid pAH820_10, complete sequence	NC_011771.1	405535
RefSeq	Bacillus cereus AH820 chromosome, complete genome	NC_011773.1	405535
RefSeq	Bacillus cereus AH820 plasmid pAH820_3, complete sequence	NC_011776.1	405535
RefSeq	Bacillus cereus AH820 plasmid pAH820_272, complete sequence	NC_011777.1	405535
RefSeq	Bacillus cereus ATCC 10987, complete genome	NC_003909.8	222523
RefSeq	Bacillus cereus ATCC 10987 plasmid pBc10987, complete sequence	NC_005707.1	222523
RefSeq	Bacillus cereus ATCC 14579 plasmid pBClin15, complete sequence	NC_004721.2	226900
RefSeq	Bacillus cereus ATCC 14579 chromosome, complete genome	NC_004722.1	226900
RefSeq	Bacillus cereus B4264 chromosome, complete genome	NC_011725.1	405532
RefSeq	Bacillus cereus E33L chromosome, complete genome	NC_006274.1	288681
RefSeq	Bacillus cereus E33L plasmid pE33L466, complete sequence	NC_007103.1	288681
RefSeq	Bacillus cereus E33L plasmid pE33L5, complete sequence	NC_007104.1	288681
RefSeq	Bacillus cereus E33L plasmid pE33L54, complete sequence	NC_007105.1	288681
RefSeq	Bacillus cereus E33L plasmid pE33L8, complete sequence	NC_007106.1	288681
RefSeq	Bacillus cereus E33L plasmid pE33L9, complete sequence	NC_007107.1	288681
RefSeq	Bacillus cereus F837/76 chromosome, complete genome	NC_016779.1	347495
RefSeq	Bacillus cereus F837/76 plasmid pF837_10, complete sequence	NC_016780.1	347495
RefSeq	Bacillus cereus F837/76 plasmid pF837_55, complete sequence	NC_016794.1	347495
RefSeq	Bacillus cereus FRI-35 chromosome, complete genome	NC_018491.1	1217984
RefSeq	Bacillus cereus FRI-35 plasmid p01, complete sequence	NC_018492.1	1217984
RefSeq	Bacillus cereus FRI-35 plasmid p02, complete sequence	NC_018493.1	1217984
RefSeq	Bacillus cereus FRI-35 plasmid p04, complete sequence	NC_018494.1	1217984
RefSeq	Bacillus cereus FRI-35 plasmid p03, complete sequence	NC_018499.1	1217984
RefSeq	Bacillus cereus G9842 chromosome, complete genome	NC_011772.1	405531
RefSeq	Bacillus cereus G9842 plasmid pG9842_140, complete sequence	NC_011774.1	405531
RefSeq	Bacillus cereus G9842 plasmid pG9842_209, complete sequence	NC_011775.1	405531
RefSeq	Bacillus cereus NC7401, complete genome	NC_016771.1	334406
RefSeq	Bacillus cereus NC7401 plasmid pNC1, complete sequence	NC_016772.1	334406
RefSeq	Bacillus cereus NC7401 plasmid pNC2, complete sequence	NC_016773.1	334406
RefSeq	Bacillus cereus NC7401 plasmid pNC4, complete sequence	NC_016774.1	334406
RefSeq	Bacillus cereus NC7401 plasmid pNCcld, complete sequence	NC_016792.1	334406
RefSeq	Bacillus cereus NC7401 plasmid pNC3, complete sequence	NC_016793.1	334406
RefSeq	Bacillus cereus Q1 chromosome, complete genome	NC_011969.1	361100
RefSeq	Bacillus cereus Q1 plasmid pBc53, complete sequence	NC_011971.1	361100
RefSeq	Bacillus cereus Q1 plasmid pBc239, complete sequence	NC_011973.1	361100
RefSeq	Bacillus cereus biovar anthracis str. CI plasmid pCI-XO1, complete sequence	NC_014331.1	637380
RefSeq	Bacillus cereus biovar anthracis str. CI plasmid pCI-XO2, complete sequence	NC_014332.1	637380
RefSeq	Bacillus cereus biovar anthracis str. CI plasmid pBAslCI14, complete sequence	NC_014333.1	637380
RefSeq	Bacillus cereus biovar anthracis str. CI chromosome, complete genome	NC_014335.1	637380
RefSeq	Bacillus clausii KSM-K16, complete genome	NC_006582.1	66692
RefSeq	Bacillus coagulans 2-6 chromosome, complete genome	NC_015634.1	941639
RefSeq	Bacillus coagulans 36D1 chromosome, complete genome	NC_016023.1	345219
RefSeq	Bacillus cereus subsp. cytotoxis NVH 391-98 plasmid pBC9801, complete sequence	NC_009673.1	315749
RefSeq	Bacillus cytotoxicus NVH 391-98 chromosome, complete genome	NC_009674.1	315749
RefSeq	Bacillus halodurans C-125 chromosome, complete genome	NC_002570.2	272558
RefSeq	Bacillus infantis NRRL B-14911, complete genome	NC_022524.1	1367477
RefSeq	Bacillus licheniformis 9945A, complete genome	NC_021362.1	766760
RefSeq	Bacillus licheniformis ATCC 14580 chromosome, complete genome	NC_006270.3	279010
RefSeq	Bacillus licheniformis DSM 13 = ATCC 14580 chromosome, complete genome	NC_006322.1	279010
RefSeq	Bacillus megaterium DSM 319 chromosome, complete genome	NC_014103.1	592022
RefSeq	Bacillus megaterium QM B1551 plasmid pBM400, complete sequence	NC_004604.2	545693
RefSeq	Bacillus megaterium QM B1551 plasmid pBM100, complete sequence	NC_010008.2	545693
RefSeq	Bacillus megaterium QM B1551 plasmid pBM200, complete sequence	NC_010009.2	545693
RefSeq	Bacillus megaterium QM B1551 plasmid pBM300, complete sequence	NC_010010.2	545693
RefSeq	Bacillus megaterium QM B1551 chromosome, complete genome	NC_014019.1	545693
RefSeq	Bacillus megaterium QM B1551 plasmid pBM700, complete sequence	NC_014023.1	545693
RefSeq	Bacillus megaterium QM B1551 plasmid pBM500, complete sequence	NC_014025.1	545693
RefSeq	Bacillus megaterium QM B1551 plasmid pBM600, complete sequence	NC_014031.1	545693
RefSeq	Bacillus megaterium WSH-002 chromosome, complete genome	NC_017138.1	1006007
RefSeq	Bacillus megaterium WSH-002 plasmid WSH-002_p1, complete sequence	NC_017139.1	1006007
RefSeq	Bacillus megaterium WSH-002 plasmid WSH-002_p2, complete sequence	NC_017140.1	1006007
RefSeq	Bacillus megaterium WSH-002 plasmid WSH-002_p3, complete sequence	NC_017141.1	1006007
RefSeq	Bacillus pseudofirmus OF4 chromosome, complete genome	NC_013791.2	398511
RefSeq	Bacillus pseudofirmus OF4 plasmid pBpOF4-01, complete sequence	NC_013792.1	398511
RefSeq	Bacillus pseudofirmus OF4 plasmid pBpOF4-02, complete sequence	NC_013793.1	398511
RefSeq	Bacillus selenitireducens MLS10 chromosome, complete genome	NC_014219.1	439292
RefSeq	Bacillus subtilis subsp. subtilis str. 168 chromosome, complete genome	NC_000964.3	224308
RefSeq	Bacillus subtilis subsp. subtilis 6051-HGW, complete genome	NC_020507.1	1147161
RefSeq	Bacillus subtilis subsp. subtilis str. BAB-1, complete genome	NC_020832.1	1302650
RefSeq	Bacillus subtilis subsp. subtilis str. BSP1 chromosome, complete genome	NC_019896.1	1192196
RefSeq	Bacillus subtilis BSn5 chromosome, complete genome	NC_014976.1	936156
RefSeq	Bacillus subtilis PY79, complete genome	NC_022898.1	1415167
RefSeq	Bacillus subtilis QB928 chromosome, complete genome	NC_018520.1	1220533
RefSeq	Bacillus subtilis subsp. subtilis str. RO-NN-1 chromosome, complete genome	NC_017195.1	1052588
RefSeq	Bacillus subtilis XF-1, complete genome	NC_020244.1	1233100
RefSeq	Bacillus subtilis subsp. natto BEST195 plasmid pBEST195S, complete sequence	NC_017194.1	645657
RefSeq	Bacillus subtilis subsp. spizizenii TU-B-10 chromosome, complete genome	NC_016047.1	1052585
RefSeq	Bacillus subtilis subsp. spizizenii str. W23 chromosome, complete genome	NC_014479.1	655816
RefSeq	Bacillus thuringiensis str. Al Hakam plasmid pALH1, complete sequence	NC_008598.1	412694
RefSeq	Bacillus thuringiensis str. Al Hakam chromosome, complete genome	NC_008600.1	412694
RefSeq	Bacillus thuringiensis BMB171 chromosome, complete genome	NC_014171.1	714359
RefSeq	Bacillus thuringiensis BMB171 plasmid pBMB171, complete sequence	NC_014172.1	714359
RefSeq	Bacillus thuringiensis Bt407 chromosome, complete genome	NC_018877.1	527021
RefSeq	Bacillus thuringiensis Bt407 plasmid BTB_502p, complete sequence	NC_018878.1	527021
RefSeq	Bacillus thuringiensis Bt407 plasmid BTB_78p, complete sequence	NC_018879.1	527021
RefSeq	Bacillus thuringiensis Bt407 plasmid BTB_15p, complete sequence	NC_018880.1	527021
RefSeq	Bacillus thuringiensis Bt407 plasmid BTB_8p, complete sequence	NC_018881.1	527021
RefSeq	Bacillus thuringiensis Bt407 plasmid BTB_7p, complete sequence	NC_018882.1	527021
RefSeq	Bacillus thuringiensis Bt407 plasmid BTB_6p, complete sequence	NC_018883.1	527021
RefSeq	Bacillus thuringiensis Bt407 plasmid BTB_5p, complete sequence	NC_018884.1	527021
RefSeq	Bacillus thuringiensis Bt407 plasmid BTB_2p, complete sequence	NC_018885.1	527021
RefSeq	Bacillus thuringiensis Bt407 plasmid BTB_9p, complete sequence	NC_018886.1	527021
RefSeq	Bacillus thuringiensis HD-771 plasmid p01, complete sequence	NC_018486.1	1218175
RefSeq	Bacillus thuringiensis HD-771 plasmid p03, complete sequence	NC_018487.1	1218175
RefSeq	Bacillus thuringiensis HD-771 plasmid p04, complete sequence	NC_018488.1	1218175
RefSeq	Bacillus thuringiensis HD-771 plasmid p06, complete sequence	NC_018489.1	1218175
RefSeq	Bacillus thuringiensis HD-771 plasmid p08, complete sequence	NC_018490.1	1218175
RefSeq	Bacillus thuringiensis HD-771 chromosome, complete genome	NC_018500.1	1218175
RefSeq	Bacillus thuringiensis HD-771 plasmid p02, complete sequence	NC_018501.1	1218175
RefSeq	Bacillus thuringiensis HD-771 plasmid p05, complete sequence	NC_018502.1	1218175
RefSeq	Bacillus thuringiensis HD-771 plasmid p07, complete sequence	NC_018503.1	1218175
RefSeq	Bacillus thuringiensis HD-789, complete genome	NC_018508.1	1217737
RefSeq	Bacillus thuringiensis HD-789 plasmid p02, complete sequence	NC_018509.1	1217737
RefSeq	Bacillus thuringiensis HD-789 plasmid p03, complete sequence	NC_018510.1	1217737
RefSeq	Bacillus thuringiensis HD-789 plasmid p05, complete sequence	NC_018511.1	1217737
RefSeq	Bacillus thuringiensis HD-789 plasmid p06, complete sequence	NC_018512.1	1217737
RefSeq	Bacillus thuringiensis HD-789 plasmid p01, complete sequence	NC_018516.1	1217737
RefSeq	Bacillus thuringiensis HD-789 plasmid p04, complete sequence	NC_018517.1	1217737
RefSeq	Bacillus thuringiensis MC28 plasmid pMC8, complete sequence	NC_018684.1	1195464
RefSeq	Bacillus thuringiensis MC28 plasmid pMC95, complete sequence	NC_018685.1	1195464
RefSeq	Bacillus thuringiensis MC28 plasmid pMC183, complete sequence	NC_018686.1	1195464
RefSeq	Bacillus thuringiensis MC28 plasmid pMC189, complete sequence	NC_018687.1	1195464
RefSeq	Bacillus thuringiensis MC28 plasmid pMC319, complete sequence	NC_018688.1	1195464
RefSeq	Bacillus thuringiensis MC28 plasmid pMC429, complete sequence	NC_018689.1	1195464
RefSeq	Bacillus thuringiensis MC28 chromosome, complete genome	NC_018693.1	1195464
RefSeq	Bacillus thuringiensis MC28 plasmid pMC54, complete sequence	NC_018694.1	1195464
RefSeq	Bacillus thuringiensis YBT-1518 plasmid pBMB0228, complete sequence	NC_020124.1	529122
RefSeq	Bacillus thuringiensis YBT-1518, complete genome	NC_022873.1	529122
RefSeq	Bacillus thuringiensis YBT-1518 plasmid pBMB0229, complete sequence	NC_022874.1	529122
RefSeq	Bacillus thuringiensis YBT-1518 plasmid pBMB0230, complete sequence	NC_022875.1	529122
RefSeq	Bacillus thuringiensis YBT-1518 plasmid pBMB0231, complete sequence	NC_022876.1	529122
RefSeq	Bacillus thuringiensis YBT-1518 plasmid pBMB0232, complete sequence	NC_022877.1	529122
RefSeq	Bacillus thuringiensis YBT-1518 plasmid pBMB0233, complete sequence	NC_022882.1	529122
RefSeq	Bacillus thuringiensis serovar thuringiensis str. IS5056, complete genome	NC_020376.1	1286404
RefSeq	Bacillus thuringiensis serovar thuringiensis str. IS5056 plasmid pIS56-8, complete sequence	NC_020377.1	1286404
RefSeq	Bacillus thuringiensis serovar thuringiensis str. IS5056 plasmid pIS56-9, complete sequence	NC_020378.1	1286404
RefSeq	Bacillus thuringiensis serovar thuringiensis str. IS5056 plasmid pIS56-15, complete sequence	NC_020379.1	1286404
RefSeq	Bacillus thuringiensis serovar thuringiensis str. IS5056 plasmid pIS56-16, complete sequence	NC_020380.1	1286404
RefSeq	Bacillus thuringiensis serovar thuringiensis str. IS5056 plasmid pIS56-39, complete sequence	NC_020381.1	1286404
RefSeq	Bacillus thuringiensis serovar thuringiensis str. IS5056 plasmid pIS56-68, complete sequence	NC_020382.1	1286404
RefSeq	Bacillus thuringiensis serovar thuringiensis str. IS5056 plasmid pIS56-85, complete sequence	NC_020383.1	1286404
RefSeq	Bacillus thuringiensis serovar thuringiensis str. IS5056 plasmid pIS56-285, complete sequence	NC_020384.1	1286404
RefSeq	Bacillus thuringiensis serovar thuringiensis str. IS5056 plasmid pIS56-328, complete sequence	NC_020385.1	1286404
RefSeq	Bacillus thuringiensis serovar thuringiensis str. IS5056 plasmid pIS56-6, complete sequence	NC_020390.1	1286404
RefSeq	Bacillus thuringiensis serovar thuringiensis str. IS5056 plasmid pIS56-11, complete sequence	NC_020391.1	1286404
RefSeq	Bacillus thuringiensis serovar thuringiensis str. IS5056 plasmid pIS56-63, complete sequence	NC_020392.1	1286404
RefSeq	Bacillus thuringiensis serovar thuringiensis str. IS5056 plasmid pIS56-107, complete sequence	NC_020393.1	1286404
RefSeq	Bacillus thuringiensis serovar thuringiensis str. IS5056 plasmid pIS56-233, complete sequence	NC_020394.1	1286404
RefSeq	Bacillus thuringiensis serovar chinensis CT-43 plasmid pCT127, complete sequence	NC_017202.1	541229
RefSeq	Bacillus thuringiensis serovar chinensis CT-43 plasmid pCT281, complete sequence	NC_017203.1	541229
RefSeq	Bacillus thuringiensis serovar chinensis CT-43 plasmid pCT51, complete sequence	NC_017204.1	541229
RefSeq	Bacillus thuringiensis serovar chinensis CT-43 plasmid pCT72, complete sequence	NC_017205.1	541229
RefSeq	Bacillus thuringiensis serovar chinensis CT-43 plasmid pCT83, complete sequence	NC_017206.1	541229
RefSeq	Bacillus thuringiensis serovar chinensis CT-43 plasmid pCT8513, complete sequence	NC_017207.1	541229
RefSeq	Bacillus thuringiensis serovar chinensis CT-43 chromosome, complete genome	NC_017208.1	541229
RefSeq	Bacillus thuringiensis serovar chinensis CT-43 plasmid pCT14, complete sequence	NC_017209.1	541229
RefSeq	Bacillus thuringiensis serovar chinensis CT-43 plasmid pCT6880, complete sequence	NC_017210.1	541229
RefSeq	Bacillus thuringiensis serovar chinensis CT-43 plasmid pCT8252, complete sequence	NC_017211.1	541229
RefSeq	Bacillus thuringiensis serovar chinensis CT-43 plasmid pCT9547, complete sequence	NC_017212.1	541229
RefSeq	Bacillus thuringiensis serovar finitimus YBT-020 plasmid pBMB28, complete sequence	NC_017199.1	930170
RefSeq	Bacillus thuringiensis serovar finitimus YBT-020 chromosome, complete genome	NC_017200.1	930170
RefSeq	Bacillus thuringiensis serovar finitimus YBT-020 plasmid pBMB26, complete sequence	NC_017201.1	930170
RefSeq	Bacillus thuringiensis serovar konkukian str. 97-27 chromosome, complete genome	NC_005957.1	281309
RefSeq	Bacillus thuringiensis serovar konkukian str. 97-27 plasmid pBT9727, complete sequence	NC_006578.1	281309
RefSeq	Bacillus thuringiensis serovar kurstaki str. HD73, complete genome	NC_020238.1	1279365
RefSeq	Bacillus thuringiensis serovar kurstaki str. HD73 plasmid pHT77, complete sequence	NC_020239.1	1279365
RefSeq	Bacillus thuringiensis serovar kurstaki str. HD73 plasmid pAW63, complete sequence	NC_020240.1	1279365
RefSeq	Bacillus thuringiensis serovar kurstaki str. HD73 plasmid pHT8_1, complete sequence	NC_020241.1	1279365
RefSeq	Bacillus thuringiensis serovar kurstaki str. HD73 plasmid pHT8_2, complete sequence	NC_020242.1	1279365
RefSeq	Bacillus thuringiensis serovar kurstaki str. HD73 plasmid pHT7, complete sequence	NC_020243.1	1279365
RefSeq	Bacillus thuringiensis serovar kurstaki str. HD73 plasmid pHT73, complete sequence	NC_020249.1	1279365
RefSeq	Bacillus thuringiensis serovar kurstaki str. HD73 plasmid pHT11, complete sequence	NC_020250.1	1279365
RefSeq	Bacillus toyonensis BCT-7112, complete genome	NC_022781.1	1415784
RefSeq	Bacillus toyonensis BCT-7112 plasmid pBCT77, complete sequence	NC_022782.1	1415784
RefSeq	Bacillus toyonensis BCT-7112 plasmid pBCT8, complete sequence	NC_022783.1	1415784
RefSeq	Bacillus weihenstephanensis KBAB4 plasmid pBWB401, complete sequence	NC_010180.1	315730
RefSeq	Bacillus weihenstephanensis KBAB4 plasmid pBWB402, complete sequence	NC_010181.1	315730
RefSeq	Bacillus weihenstephanensis KBAB4 plasmid pBWB403, complete sequence	NC_010182.1	315730
RefSeq	Bacillus weihenstephanensis KBAB4 plasmid pBWB404, complete sequence	NC_010183.1	315730
RefSeq	Bacillus weihenstephanensis KBAB4 chromosome, complete genome	NC_010184.1	315730
RefSeq	Bacteriovorax marinus SJ, complete genome	NC_016620.1	862908
RefSeq	Bacteriovorax marinus SJ plasmid pBMS1, complete sequence	NC_019100.1	862908
RefSeq	Bacteroides fragilis 638R, complete genome	NC_016776.1	862962
RefSeq	Bacteroides fragilis NCTC 9343, complete genome	NC_003228.3	272559
RefSeq	Bacteroides fragilis NCTC 9343 plasmid pBF9343, complete sequence	NC_006873.1	272559
RefSeq	Bacteroides fragilis YCH46 plasmid pBFY46, complete sequence	NC_006297.1	295405
RefSeq	Bacteroides fragilis YCH46 DNA, complete genome	NC_006347.1	295405
RefSeq	Bacteroides helcogenes P 36-108 chromosome, complete genome	NC_014933.1	693979
RefSeq	Bacteroides salanitronis DSM 18170 chromosome, complete genome	NC_015164.1	667015
RefSeq	Bacteroides salanitronis DSM 18170 plasmid pBACSA01, complete sequence	NC_015165.1	667015
RefSeq	Bacteroides salanitronis DSM 18170 plasmid pBACSA03, complete sequence	NC_015166.1	667015
RefSeq	Bacteroides salanitronis DSM 18170 plasmid pBACSA02, complete sequence	NC_015168.1	667015
RefSeq	Bacteroides thetaiotaomicron VPI-5482 chromosome, complete genome	NC_004663.1	226186
RefSeq	Bacteroides thetaiotaomicron VPI-5482 plasmid p5482, complete sequence	NC_004703.1	226186
RefSeq	Bacteroides vulgatus ATCC 8482 chromosome, complete genome	NC_009614.1	435590
RefSeq	Bartonella australis Aust/NH1, complete genome	NC_020300.1	1094489
RefSeq	Bartonella bacilliformis KC583, complete genome	NC_008783.1	360095
RefSeq	Bartonella clarridgeiae 73, complete genome	NC_014932.1	696125
RefSeq	Bartonella grahamii as4aup, complete genome	NC_012846.1	634504
RefSeq	Bartonella grahamii as4aup plasmid pBGR3, complete sequence	NC_012847.1	634504
RefSeq	Bartonella henselae str. Houston-1 chromosome, complete genome	NC_005956.1	283166
RefSeq	Bartonella quintana RM-11 chromosome, complete genome	NC_018533.1	1225179
RefSeq	Bartonella quintana str. Toulouse, complete genome	NC_005955.1	283165
RefSeq	Bartonella tribocorum CIP 105476 plasmid pBT01, complete sequence	NC_010160.1	382640
RefSeq	Bartonella tribocorum CIP 105476 chromosome, complete genome	NC_010161.1	382640
RefSeq	Bartonella vinsonii subsp. berkhoffii str. Winnie, complete genome	NC_020301.1	1094497
RefSeq	Baumannia cicadellinicola str. Hc (Homalodisca coagulata), complete genome	NC_007984.1	374463
RefSeq	Bdellovibrio bacteriovorus HD100, complete genome	NC_005363.1	264462
RefSeq	Bdellovibrio bacteriovorus str. Tiberius chromosome, complete genome	NC_019567.1	1069642
RefSeq	Bdellovibrio exovorus JSS, complete genome	NC_020813.1	1184267
RefSeq	Beijerinckia indica subsp. indica ATCC 9039 plasmid pBIND02, complete sequence	NC_010578.1	395963
RefSeq	Beijerinckia indica subsp. indica ATCC 9039 plasmid pBIND01, complete sequence	NC_010580.1	395963
RefSeq	Beijerinckia indica subsp. indica ATCC 9039 chromosome, complete genome	NC_010581.1	395963
RefSeq	Belliella baltica DSM 15883 chromosome, complete genome	NC_018010.1	866536
RefSeq	Beutenbergia cavernae DSM 12333 chromosome, complete genome	NC_012669.1	471853
RefSeq	Bibersteinia trehalosi USDA-ARS-USMARC-192, complete genome	NC_020515.1	1171377
RefSeq	Bifidobacterium adolescentis ATCC 15703 chromosome, complete genome	NC_008618.1	367928
RefSeq	Bifidobacterium animalis subsp. animalis ATCC 25527 chromosome, complete genome	NC_017834.1	703613
RefSeq	Bifidobacterium animalis subsp. lactis AD011 chromosome, complete genome	NC_011835.1	442563
RefSeq	Bifidobacterium animalis subsp. lactis ATCC 27673 chromosome, complete genome	NC_022523.1	1167629
RefSeq	Bifidobacterium animalis subsp. lactis B420 chromosome, complete genome	NC_017866.1	1168290
RefSeq	Bifidobacterium animalis subsp. lactis BB-12 chromosome, complete genome	NC_017214.1	552531
RefSeq	Bifidobacterium animalis subsp. lactis BLC1, complete genome	NC_017216.2	1075106
RefSeq	Bifidobacterium animalis subsp. lactis Bi-07 chromosome, complete genome	NC_017867.1	742729
RefSeq	Bifidobacterium animalis subsp. lactis Bl12, complete genome	NC_021593.1	1281781
RefSeq	Bifidobacterium animalis subsp. lactis Bl-04 chromosome, complete genome	NC_012814.1	580050
RefSeq	Bifidobacterium animalis subsp. lactis CNCM I-2494 chromosome, complete genome	NC_017215.1	1042403
RefSeq	Bifidobacterium animalis subsp. lactis DSM 10140 chromosome, complete genome	NC_012815.1	555970
RefSeq	Bifidobacterium animalis subsp. lactis V9 chromosome, complete genome	NC_017217.1	573236
RefSeq	Bifidobacterium asteroides PRL2011 chromosome, complete genome	NC_018720.1	1147128
RefSeq	Bifidobacterium bifidum BGN4 chromosome, complete genome	NC_017999.1	484020
RefSeq	Bifidobacterium bifidum PRL2010 chromosome, complete genome	NC_014638.1	702459
RefSeq	Bifidobacterium bifidum S17 chromosome, complete genome	NC_014616.1	883062
RefSeq	Bifidobacterium breve ACS-071-V-Sch8b chromosome, complete genome	NC_017218.1	866777
RefSeq	Bifidobacterium breve UCC2003, complete genome	NC_020517.1	326426
RefSeq	Bifidobacterium dentium Bd1 chromosome, complete genome	NC_013714.1	401473
RefSeq	Bifidobacterium longum subsp. longum BBMN68 chromosome, complete genome	NC_014656.1	890402
RefSeq	Bifidobacterium longum DJO10A plasmid pDOJH10L, complete sequence	NC_004252.1	205913
RefSeq	Bifidobacterium longum DJO10A plasmid pDOJH10S, complete sequence	NC_004253.1	205913
RefSeq	Bifidobacterium longum DJO10A chromosome, complete genome	NC_010816.1	205913
RefSeq	Bifidobacterium longum subsp. longum F8 draft genome	NC_021008.1	722911
RefSeq	Bifidobacterium longum subsp. longum JCM 1217 chromosome, complete genome	NC_015067.1	565042
RefSeq	Bifidobacterium longum subsp. longum JDM301 chromosome, complete genome	NC_014169.1	759350
RefSeq	Bifidobacterium longum subsp. longum KACC 91563 plasmid BLNIAS_P1, complete sequence	NC_017220.1	1035817
RefSeq	Bifidobacterium longum subsp. longum KACC 91563 chromosome, complete genome	NC_017221.1	1035817
RefSeq	Bifidobacterium longum subsp. longum KACC 91563 plasmid BLNIAS_P2, complete sequence	NC_017222.1	1035817
RefSeq	Bifidobacterium longum NCC2705 chromosome, complete genome	NC_004307.2	206672
RefSeq	Bifidobacterium longum NCC2705 plasmid pBLO1, complete sequence	NC_004943.1	206672
RefSeq	Bifidobacterium longum subsp. infantis 157F chromosome, complete genome	NC_015052.1	565040
RefSeq	Bifidobacterium longum subsp. infantis 157F plasmid p157F-NC1, complete sequence	NC_015053.1	565040
RefSeq	Bifidobacterium longum subsp. infantis 157F plasmid p157F-NC2, complete sequence	NC_015066.1	565040
RefSeq	Bifidobacterium longum subsp. infantis ATCC 15697, complete genome	NC_017219.1	391904
RefSeq	Bifidobacterium longum subsp. infantis ATCC 15697 chromosome, complete genome	NC_011593.1	391904
RefSeq	Bifidobacterium thermophilum RBL67, complete genome	NC_020546.1	1254439
RefSeq	Blastococcus saxobsidens DD2, complete genome	NC_016943.1	1146883
RefSeq	Blattabacterium sp. (Blaberus giganteus) chromosome, complete genome	NC_017924.1	1186051
RefSeq	Blattabacterium sp. (Blaberus giganteus) plasmid pBGIBA, complete sequence	NC_017925.1	1186051
RefSeq	Blattabacterium sp. (Blatta orientalis) str. Tarazona, complete genome	NC_020195.1	1072467
RefSeq	Blattabacterium sp. (Blatta orientalis) str. Tarazona plasmid, complete sequence	NC_020196.1	1072467
RefSeq	Blattabacterium sp. (Blattella germanica) str. Bge, complete genome	NC_013454.1	331104
RefSeq	Blattabacterium sp. (Blattella germanica) str. Bge plasmid pBge, complete sequence	NC_015679.1	331104
RefSeq	Blattabacterium sp. (Cryptocercus punctulatus) str. Cpu plasmid pCpu, complete sequence	NC_016598.1	1075399
RefSeq	Blattabacterium sp. (Cryptocercus punctulatus) str. Cpu chromosome, complete genome	NC_016621.1	1075399
RefSeq	Blattabacterium sp. (Mastotermes darwiniensis) str. MADAR chromosome, complete genome	NC_016146.1	1074889
RefSeq	Blattabacterium sp. (Mastotermes darwiniensis) str. MADAR plasmid pMADAR_001, complete sequence	NC_016150.1	1074889
RefSeq	Blattabacterium sp. (Nauphoeta cinerea), complete genome	NC_022550.1	1316444
RefSeq	Blattabacterium sp. (Nauphoeta cinerea) plasmid, complete sequence	NC_022551.1	1316444
RefSeq	Blattabacterium sp. (Panesthia angustipennis spadica) str. BPAA DNA, complete genome	NC_020510.1	1229512
RefSeq	Blattabacterium sp. (Periplaneta americana) str. BPLAN, complete genome	NC_013418.2	600809
RefSeq	Blattabacterium sp. (Periplaneta americana) str. BPLAN plasmid pBPLAN, complete sequence	NC_013419.1	600809
RefSeq	Bordetella avium 197N chromosome, complete genome	NC_010645.1	360910
RefSeq	Bordetella bronchiseptica 253, complete genome	NC_019382.1	568707
RefSeq	Bordetella bronchiseptica MO149, complete genome	NC_018829.1	1208658
RefSeq	Bordetella bronchiseptica RB50 chromosome, complete genome	NC_002927.3	257310
RefSeq	Bordetella parapertussis 12822 chromosome, complete genome	NC_002928.3	257311
RefSeq	Bordetella pertussis 18323, complete genome	NC_018518.1	568706
RefSeq	Bordetella parapertussis Bpp5, complete genome	NC_018828.1	1208660
RefSeq	Bordetella parapertussis Bpp5 plasmid BPP5P1, complete sequence	NC_018830.1	1208660
RefSeq	Bordetella pertussis CS chromosome, complete genome	NC_017223.1	1017264
RefSeq	Bordetella pertussis Tohama I chromosome, complete genome	NC_002929.2	257313
RefSeq	Bordetella petrii DSM 12804 chromosome, complete genome	NC_010170.1	94624
RefSeq	Borrelia afzelii HLJ01 chromosome, complete genome	NC_018887.1	1239934
RefSeq	Borrelia afzelii PKo plasmid cp32-11, complete sequence	NC_017224.1	390236
RefSeq	Borrelia afzelii PKo plasmid cp32-12, complete sequence	NC_017225.1	390236
RefSeq	Borrelia afzelii PKo plasmid cp32-3, complete sequence	NC_017226.1	390236
RefSeq	Borrelia afzelii PKo plasmid cp32-5, complete sequence	NC_017227.1	390236
RefSeq	Borrelia afzelii PKo plasmid cp32-9, complete sequence	NC_017228.1	390236
RefSeq	Borrelia afzelii PKo plasmid cp26, complete sequence	NC_017229.1	390236
RefSeq	Borrelia afzelii PKo plasmid cp32-1, complete sequence	NC_017230.1	390236
RefSeq	Borrelia afzelii PKo plasmid cp32-7, complete sequence	NC_017231.1	390236
RefSeq	Borrelia afzelii PKo plasmid lp17, complete sequence	NC_017232.1	390236
RefSeq	Borrelia afzelii PKo plasmid lp28-3, complete sequence	NC_017233.1	390236
RefSeq	Borrelia afzelii PKo plasmid lp28-4, complete sequence	NC_017234.1	390236
RefSeq	Borrelia afzelii PKo plasmid lp28-7, complete sequence	NC_017235.1	390236
RefSeq	Borrelia afzelii PKo plasmid lp28-8, complete sequence	NC_017236.1	390236
RefSeq	Borrelia afzelii PKo plasmid lp38, complete sequence	NC_017237.1	390236
RefSeq	Borrelia afzelii PKo chromosome, complete genome	NC_017238.1	390236
RefSeq	Borrelia afzelii PKo plasmid lp28-2, complete sequence	NC_017239.1	390236
RefSeq	Borrelia afzelii PKo plasmid lp32-10, complete sequence	NC_017240.1	390236
RefSeq	Borrelia afzelii PKo plasmid lp54, complete sequence	NC_017241.1	390236
RefSeq	Borrelia afzelii PKo plasmid cp30, complete sequence	NC_008273.1	390236
RefSeq	Borrelia afzelii PKo plasmid cp27, complete sequence	NC_008274.1	390236
RefSeq	Borrelia afzelii PKo, complete genome	NC_008277.1	390236
RefSeq	Borrelia afzelii PKo plasmid lp60, complete sequence	NC_008564.1	390236
RefSeq	Borrelia afzelii PKo plasmid lp60-2, complete sequence	NC_008565.1	390236
RefSeq	Borrelia afzelii PKo plasmid lp34, complete sequence	NC_008566.1	390236
RefSeq	Borrelia afzelii PKo plasmid lp32, complete sequence	NC_008567.1	390236
RefSeq	Borrelia afzelii PKo plasmid lp28, complete sequence	NC_008568.1	390236
RefSeq	Borrelia afzelii PKo plasmid lp25, complete sequence	NC_008569.1	390236
RefSeq	Borrelia afzelii PKo clone fragment a	NT_167350.1	390236
RefSeq	Borrelia afzelii PKo clone fragment b	NT_167351.1	390236
RefSeq	Borrelia afzelii PKo clone fragment c	NT_167352.1	390236
RefSeq	Borrelia bissettii DN127 plasmid cp32-11, complete sequence	NC_015903.1	521010
RefSeq	Borrelia bissettii DN127 plasmid cp32-4, complete sequence	NC_015904.1	521010
RefSeq	Borrelia bissettii DN127 plasmid cp32-6, complete sequence	NC_015905.1	521010
RefSeq	Borrelia bissettii DN127 plasmid cp32-quad, complete sequence	NC_015906.1	521010
RefSeq	Borrelia bissettii DN127 plasmid cp26, complete sequence	NC_015907.1	521010
RefSeq	Borrelia bissettii DN127 plasmid cp32-3, complete sequence	NC_015908.1	521010
RefSeq	Borrelia bissettii DN127 plasmid cp32-5, complete sequence	NC_015909.1	521010
RefSeq	Borrelia bissettii DN127 plasmid cp32-7, complete sequence	NC_015910.1	521010
RefSeq	Borrelia bissettii DN127 plasmid cp9, complete sequence	NC_015911.1	521010
RefSeq	Borrelia bissettii DN127 plasmid lp17, complete sequence	NC_015915.1	521010
RefSeq	Borrelia bissettii DN127 plasmid lp28-3, complete sequence	NC_015916.1	521010
RefSeq	Borrelia bissettii DN127 plasmid lp28-4, complete sequence	NC_015917.1	521010
RefSeq	Borrelia bissettii DN127 plasmid lp28-7, complete sequence	NC_015918.1	521010
RefSeq	Borrelia bissettii DN127 plasmid lp54, complete sequence	NC_015919.1	521010
RefSeq	Borrelia bissettii DN127 plasmid lp56, complete sequence	NC_015920.1	521010
RefSeq	Borrelia bissettii DN127 chromosome, complete genome	NC_015921.1	521010
RefSeq	Borrelia bissettii DN127 plasmid lp25, complete sequence	NC_015922.1	521010
RefSeq	Borrelia burgdorferi B31 plasmid cp32-1, complete sequence	NC_000948.1	224326
RefSeq	Borrelia burgdorferi B31 plasmid cp32-3, complete sequence	NC_000949.1	224326
RefSeq	Borrelia burgdorferi B31 plasmid cp32-4, complete sequence	NC_000950.1	224326
RefSeq	Borrelia burgdorferi B31 plasmid cp32-6, complete sequence	NC_000951.1	224326
RefSeq	Borrelia burgdorferi B31 plasmid cp32-7, complete sequence	NC_000952.1	224326
RefSeq	Borrelia burgdorferi B31 plasmid cp32-8, complete sequence	NC_000953.1	224326
RefSeq	Borrelia burgdorferi B31 plasmid cp32-9, complete sequence	NC_000954.1	224326
RefSeq	Borrelia burgdorferi B31 plasmid lp21, complete sequence	NC_000955.2	224326
RefSeq	Borrelia burgdorferi B31 plasmid lp56, complete sequence	NC_000956.1	224326
RefSeq	Borrelia burgdorferi B31 plasmid lp5, complete sequence	NC_000957.1	224326
RefSeq	Borrelia burgdorferi B31 chromosome, complete genome	NC_001318.1	224326
RefSeq	Borrelia burgdorferi B31 plasmid lp17, complete sequence	NC_001849.2	224326
RefSeq	Borrelia burgdorferi B31 plasmid lp25, complete sequence	NC_001850.1	224326
RefSeq	Borrelia burgdorferi B31 plasmid lp28-1, complete sequence	NC_001851.2	224326
RefSeq	Borrelia burgdorferi B31 plasmid lp28-2, complete sequence	NC_001852.1	224326
RefSeq	Borrelia burgdorferi B31 plasmid lp28-3, complete sequence	NC_001853.1	224326
RefSeq	Borrelia burgdorferi B31 plasmid lp28-4, complete sequence	NC_001854.1	224326
RefSeq	Borrelia burgdorferi B31 plasmid lp36, complete sequence	NC_001855.1	224326
RefSeq	Borrelia burgdorferi B31 plasmid lp38, complete sequence	NC_001856.1	224326
RefSeq	Borrelia burgdorferi B31 plasmid lp54, complete sequence	NC_001857.2	224326
RefSeq	Borrelia burgdorferi B31 plasmid cp26, complete sequence	NC_001903.1	224326
RefSeq	Borrelia burgdorferi B31 plasmid cp9, complete sequence	NC_001904.1	224326
RefSeq	Borrelia burgdorferi CA382, complete genome	NC_022048.1	1328311
RefSeq	Borrelia burgdorferi JD1 plasmid JD1_lp54, complete sequence	NC_013129.1	521008
RefSeq	Borrelia burgdorferi JD1 plasmid JD1 cp32-11, complete sequence	NC_017393.1	521008
RefSeq	Borrelia burgdorferi JD1 plasmid JD1 cp32-1+5, complete sequence	NC_017394.1	521008
RefSeq	Borrelia burgdorferi JD1 plasmid JD1 cp26, complete sequence	NC_017395.1	521008
RefSeq	Borrelia burgdorferi JD1 plasmid JD1 cp32-12, complete sequence	NC_017396.1	521008
RefSeq	Borrelia burgdorferi JD1 plasmid JD1 cp32-9, complete sequence	NC_017397.1	521008
RefSeq	Borrelia burgdorferi JD1 chromosome, complete genome	NC_017403.1	521008
RefSeq	Borrelia burgdorferi JD1 plasmid JD1 lp28-1, complete sequence	NC_017404.1	521008
RefSeq	Borrelia burgdorferi JD1 plasmid JD1 lp28-3, complete sequence	NC_017405.1	521008
RefSeq	Borrelia burgdorferi JD1 plasmid JD1 lp28-5, complete sequence	NC_017406.1	521008
RefSeq	Borrelia burgdorferi JD1 plasmid JD1 lp28-4, complete sequence	NC_017407.1	521008
RefSeq	Borrelia burgdorferi JD1 plasmid JD1 lp28-6, complete sequence	NC_017408.1	521008
RefSeq	Borrelia burgdorferi JD1 plasmid JD1 lp25, complete sequence	NC_017409.1	521008
RefSeq	Borrelia burgdorferi JD1 plasmid JD1 lp17, complete sequence	NC_017410.1	521008
RefSeq	Borrelia burgdorferi JD1 plasmid JD1 lp36, complete sequence	NC_017411.1	521008
RefSeq	Borrelia burgdorferi JD1 plasmid JD1 lp28-7, complete sequence	NC_017412.1	521008
RefSeq	Borrelia burgdorferi JD1 plasmid JD1 lp38, complete sequence	NC_017413.1	521008
RefSeq	Borrelia burgdorferi JD1 plasmid JD1 cp32-6, complete sequence	NC_017425.1	521008
RefSeq	Borrelia burgdorferi JD1 plasmid JD1 cp32-8, complete sequence	NC_017426.1	521008
RefSeq	Borrelia burgdorferi JD1 plasmid JD1 cp32-3, complete sequence	NC_017427.1	521008
RefSeq	Borrelia burgdorferi JD1 plasmid JD1 cp32-10, complete sequence	NC_017428.1	521008
RefSeq	Borrelia burgdorferi N40 plasmid N40_lp54, complete sequence	NC_013130.1	521007
RefSeq	Borrelia burgdorferi N40 plasmid N40_cp32-5, complete sequence	NC_017398.1	521007
RefSeq	Borrelia burgdorferi N40 plasmid N40_cp9, complete sequence	NC_017399.1	521007
RefSeq	Borrelia burgdorferi N40 plasmid N40_cp32-4, complete sequence	NC_017400.1	521007
RefSeq	Borrelia burgdorferi N40 plasmid N40_cp26, complete sequence	NC_017401.1	521007
RefSeq	Borrelia burgdorferi N40 plasmid N40_cp32-9, complete sequence	NC_017402.1	521007
RefSeq	Borrelia burgdorferi N40 plasmid N40_lp36, complete sequence	NC_017414.1	521007
RefSeq	Borrelia burgdorferi N40 plasmid N40_lp28-5, complete sequence	NC_017415.1	521007
RefSeq	Borrelia burgdorferi N40 plasmid N40_lp28-4, complete sequence	NC_017416.1	521007
RefSeq	Borrelia burgdorferi N40 plasmid N40_lp17, complete sequence	NC_017417.1	521007
RefSeq	Borrelia burgdorferi N40 chromosome, complete genome	NC_017418.1	521007
RefSeq	Borrelia burgdorferi N40 plasmid N40_lp28-2, complete sequence	NC_017419.1	521007
RefSeq	Borrelia burgdorferi N40 plasmid N40_lp25, complete sequence	NC_017420.1	521007
RefSeq	Borrelia burgdorferi N40 plasmid N40_lp38, complete sequence	NC_017421.1	521007
RefSeq	Borrelia burgdorferi N40 plasmid N40_cp32-7, complete sequence	NC_017422.1	521007
RefSeq	Borrelia burgdorferi N40 plasmid N40_cp32-12, complete sequence	NC_017423.1	521007
RefSeq	Borrelia burgdorferi N40 plasmid N40_cp32-10, complete sequence	NC_017424.1	521007
RefSeq	Borrelia burgdorferi ZS7 plasmid ZS7_cp32-3+10, complete sequence	NC_011720.1	445985
RefSeq	Borrelia burgdorferi ZS7 plasmid ZS7_cp32-9, complete sequence	NC_011722.1	445985
RefSeq	Borrelia burgdorferi ZS7 plasmid ZS7_cp26, complete sequence	NC_011724.1	445985
RefSeq	Borrelia burgdorferi ZS7, complete genome	NC_011728.1	445985
RefSeq	Borrelia burgdorferi ZS7 plasmid ZS7_cp32-1, complete sequence	NC_011731.1	445985
RefSeq	Borrelia burgdorferi ZS7 plasmid ZS7_cp32-12, complete sequence	NC_011735.1	445985
RefSeq	Borrelia burgdorferi ZS7 plasmid ZS7_cp32-4, complete sequence	NC_011736.1	445985
RefSeq	Borrelia burgdorferi ZS7 plasmid ZS7_lp36, complete sequence	NC_011778.1	445985
RefSeq	Borrelia burgdorferi ZS7 plasmid ZS7_lp28-2, complete sequence	NC_011779.1	445985
RefSeq	Borrelia burgdorferi ZS7 plasmid ZS7_lp28-1, complete sequence	NC_011780.1	445985
RefSeq	Borrelia burgdorferi ZS7 plasmid ZS7_lp28-3, complete sequence	NC_011781.1	445985
RefSeq	Borrelia burgdorferi ZS7 plasmid ZS7_lp17, complete sequence	NC_011782.1	445985
RefSeq	Borrelia burgdorferi ZS7 plasmid ZS7_lp25, complete sequence	NC_011783.1	445985
RefSeq	Borrelia burgdorferi ZS7 plasmid ZS7_lp54, complete sequence	NC_011784.1	445985
RefSeq	Borrelia burgdorferi ZS7 plasmid ZS7_lp28-4, complete sequence	NC_011785.1	445985
RefSeq	Borrelia crocidurae str. Achema plasmid unnamed, complete sequence	NC_017774.1	1155096
RefSeq	Borrelia crocidurae str. Achema plasmid unnamed, complete sequence	NC_017775.1	1155096
RefSeq	Borrelia crocidurae str. Achema plasmid unnamed, complete sequence	NC_017776.1	1155096
RefSeq	Borrelia crocidurae str. Achema plasmid unnamed, complete sequence	NC_017777.1	1155096
RefSeq	Borrelia crocidurae str. Achema plasmid unnamed, complete sequence	NC_017778.1	1155096
RefSeq	Borrelia crocidurae str. Achema plasmid unnamed, complete sequence	NC_017779.1	1155096
RefSeq	Borrelia crocidurae str. Achema plasmid unnamed, complete sequence	NC_017780.1	1155096
RefSeq	Borrelia crocidurae str. Achema plasmid unnamed, complete sequence	NC_017781.1	1155096
RefSeq	Borrelia crocidurae str. Achema plasmid unnamed, complete sequence	NC_017782.1	1155096
RefSeq	Borrelia crocidurae str. Achema plasmid unnamed, complete sequence	NC_017783.1	1155096
RefSeq	Borrelia crocidurae str. Achema plasmid unnamed, complete sequence	NC_017784.1	1155096
RefSeq	Borrelia crocidurae str. Achema plasmid unnamed, complete sequence	NC_017785.1	1155096
RefSeq	Borrelia crocidurae str. Achema plasmid unnamed, complete sequence	NC_017786.1	1155096
RefSeq	Borrelia crocidurae str. Achema plasmid unnamed, complete sequence	NC_017787.1	1155096
RefSeq	Borrelia crocidurae str. Achema plasmid unnamed, complete sequence	NC_017788.1	1155096
RefSeq	Borrelia crocidurae str. Achema plasmid unnamed, complete sequence	NC_017789.1	1155096
RefSeq	Borrelia crocidurae str. Achema plasmid unnamed, complete sequence	NC_017794.1	1155096
RefSeq	Borrelia crocidurae str. Achema plasmid unnamed, complete sequence	NC_017795.1	1155096
RefSeq	Borrelia crocidurae str. Achema plasmid unnamed, complete sequence	NC_017796.1	1155096
RefSeq	Borrelia crocidurae str. Achema plasmid unnamed, complete sequence	NC_017797.1	1155096
RefSeq	Borrelia crocidurae str. Achema plasmid unnamed, complete sequence	NC_017798.1	1155096
RefSeq	Borrelia crocidurae str. Achema plasmid unnamed, complete sequence	NC_017799.1	1155096
RefSeq	Borrelia crocidurae str. Achema plasmid unnamed, complete sequence	NC_017800.1	1155096
RefSeq	Borrelia crocidurae str. Achema plasmid unnamed, complete sequence	NC_017801.1	1155096
RefSeq	Borrelia crocidurae str. Achema plasmid unnamed, complete sequence	NC_017802.1	1155096
RefSeq	Borrelia crocidurae str. Achema chromosome, complete genome	NC_017808.1	1155096
RefSeq	Borrelia crocidurae str. Achema plasmid unnamed, complete sequence	NC_017809.1	1155096
RefSeq	Borrelia crocidurae str. Achema plasmid unnamed, complete sequence	NC_017810.1	1155096
RefSeq	Borrelia crocidurae str. Achema plasmid unnamed, complete sequence	NC_017811.1	1155096
RefSeq	Borrelia crocidurae str. Achema plasmid unnamed, complete sequence	NC_017812.1	1155096
RefSeq	Borrelia crocidurae str. Achema plasmid unnamed, complete sequence	NC_017813.1	1155096
RefSeq	Borrelia crocidurae str. Achema plasmid unnamed, complete sequence	NC_017814.1	1155096
RefSeq	Borrelia crocidurae str. Achema plasmid unnamed, complete sequence	NC_017815.1	1155096
RefSeq	Borrelia crocidurae str. Achema plasmid unnamed, complete sequence	NC_017816.1	1155096
RefSeq	Borrelia crocidurae str. Achema plasmid unnamed, complete sequence	NC_017817.1	1155096
RefSeq	Borrelia crocidurae str. Achema plasmid unnamed, complete sequence	NC_017818.1	1155096
RefSeq	Borrelia crocidurae str. Achema plasmid unnamed, complete sequence	NC_017819.1	1155096
RefSeq	Borrelia crocidurae str. Achema plasmid unnamed, complete sequence	NC_017820.1	1155096
RefSeq	Borrelia crocidurae str. Achema plasmid unnamed, complete sequence	NC_017821.1	1155096
RefSeq	Borrelia crocidurae str. Achema plasmid unnamed, complete sequence	NC_017822.1	1155096
RefSeq	Borrelia duttonii Ly plasmid pl11, complete sequence	NC_011224.1	412419
RefSeq	Borrelia duttonii Ly plasmid pl15, complete sequence	NC_011226.1	412419
RefSeq	Borrelia duttonii Ly, complete genome	NC_011229.1	412419
RefSeq	Borrelia duttonii Ly plasmid pl28, complete sequence	NC_011245.1	412419
RefSeq	Borrelia duttonii Ly plasmid pl165, complete sequence	NC_011247.1	412419
RefSeq	Borrelia duttonii Ly plasmid pl35, complete sequence	NC_011248.1	412419
RefSeq	Borrelia duttonii Ly plasmid pl36, complete sequence	NC_011249.1	412419
RefSeq	Borrelia duttonii Ly plasmid pl40, complete sequence	NC_011250.1	412419
RefSeq	Borrelia duttonii Ly plasmid pl41, complete sequence	NC_011251.1	412419
RefSeq	Borrelia duttonii Ly plasmid pl42, complete sequence	NC_011254.1	412419
RefSeq	Borrelia duttonii Ly plasmid pl70, complete sequence	NC_011256.1	412419
RefSeq	Borrelia duttonii Ly plasmid pl23, complete sequence	NC_011257.1	412419
RefSeq	Borrelia duttonii Ly plasmid pl23b, complete sequence	NC_011259.1	412419
RefSeq	Borrelia duttonii Ly plasmid pl26, complete sequence	NC_011261.1	412419
RefSeq	Borrelia duttonii Ly plasmid pl31, complete sequence	NC_011262.1	412419
RefSeq	Borrelia duttonii Ly plasmid pl32, complete sequence	NC_011264.1	412419
RefSeq	Borrelia duttonii Ly plasmid pl27, complete sequence	NC_011265.1	412419
RefSeq	Borrelia garinii BgVir chromosome linear, complete sequence	NC_017717.1	1081646
RefSeq	Borrelia garinii BgVir plasmid cp26, complete sequence	NC_017725.1	1081646
RefSeq	Borrelia garinii BgVir plasmid lp54, complete sequence	NC_017804.1	1081646
RefSeq	Borrelia garinii NMJW1 chromosome, complete genome	NC_018747.1	1234596
RefSeq	Borrelia garinii PBi plasmid cp26, complete sequence	NC_006128.1	290434
RefSeq	Borrelia garinii PBi plasmid lp54, complete sequence	NC_006129.1	290434
RefSeq	Borrelia garinii PBi chromosome linear, complete sequence	NC_006156.1	290434
RefSeq	Borrelia hermsii DAH chromosome, complete genome	NC_010673.1	314723
RefSeq	Borrelia hermsii DAH clone fragment 1025rc	NT_187136.1	314723
RefSeq	Borrelia hermsii DAH clone fragment 1034rc	NT_187137.1	314723
RefSeq	Borrelia hermsii DAH clone fragment 1029	NT_187138.1	314723
RefSeq	Borrelia hermsii DAH clone fragment 1046T	NT_187139.1	314723
RefSeq	Borrelia hermsii DAH clone fragment 1047L	NT_187140.1	314723
RefSeq	Borrelia hermsii DAH clone fragment 1047R	NT_187141.1	314723
RefSeq	Borrelia hermsii DAH clone fragment 1050	NT_187142.1	314723
RefSeq	Borrelia hermsii DAH clone fragment 1051L	NT_187143.1	314723
RefSeq	Borrelia hermsii DAH clone fragment 983	NT_187144.1	314723
RefSeq	Borrelia hermsii DAH	NT_187145.1	314723
RefSeq	Borrelia recurrentis A1, complete genome	NC_011244.1	412418
RefSeq	Borrelia recurrentis A1 plasmid pl124, complete sequence	NC_011246.1	412418
RefSeq	Borrelia recurrentis A1 plasmid pl23, complete sequence	NC_011252.1	412418
RefSeq	Borrelia recurrentis A1 plasmid pl33, complete sequence	NC_011253.1	412418
RefSeq	Borrelia recurrentis A1 plasmid pl35, complete sequence	NC_011255.1	412418
RefSeq	Borrelia recurrentis A1 plasmid pl37, complete sequence	NC_011258.1	412418
RefSeq	Borrelia recurrentis A1 plasmid pl53, complete sequence	NC_011260.1	412418
RefSeq	Borrelia recurrentis A1 plasmid pl6, complete sequence	NC_011263.1	412418
RefSeq	Borrelia turicatae 91E135 chromosome, complete genome	NC_008710.1	314724
RefSeq	Borrelia valaisiana VS116 plasmid VS116_cp32-5, complete sequence	NC_012128.1	445987
RefSeq	Borrelia valaisiana VS116 plasmid VS116_cp26, complete sequence	NC_012129.1	445987
RefSeq	Borrelia valaisiana VS116 plasmid VS116_cp9, complete sequence	NC_012130.1	445987
RefSeq	Borrelia valaisiana VS116 plasmid VS116_cp32-2-7, complete sequence	NC_012131.1	445987
RefSeq	Borrelia valaisiana VS116 plasmid VS116_cp32-10, complete sequence	NC_012133.1	445987
RefSeq	Borrelia valaisiana VS116 plasmid VS116_lp25, complete sequence	NC_012166.1	445987
RefSeq	Borrelia valaisiana VS116 plasmid VS116_lp28-8, complete sequence	NC_012169.1	445987
RefSeq	Borrelia valaisiana VS116 plasmid VS116_lp54, complete sequence	NC_012177.1	445987
RefSeq	Borrelia valaisiana VS116 plasmid VS116_lp17, complete sequence	NC_012180.1	445987
RefSeq	Borrelia valaisiana VS116 plasmid VS116_lp28-3, complete sequence	NC_012185.1	445987
RefSeq	Borrelia valaisiana VS116 plasmid VS116_lp36, complete sequence	NC_012204.1	445987
RefSeq	Brachybacterium faecium DSM 4810 chromosome, complete genome	NC_013172.1	446465
RefSeq	Brachyspira hyodysenteriae WA1 chromosome, complete genome	NC_012225.1	565034
RefSeq	Brachyspira hyodysenteriae WA1 plasmid pBHWA1, complete sequence	NC_012226.1	565034
RefSeq	Brachyspira intermedia PWS/A plasmid pInt, complete sequence	NC_017242.1	1045858
RefSeq	Brachyspira intermedia PWS/A chromosome, complete genome	NC_017243.1	1045858
RefSeq	Brachyspira murdochii DSM 12563 chromosome, complete genome	NC_014150.1	526224
RefSeq	Brachyspira pilosicoli 95/1000 chromosome, complete genome	NC_014330.1	759914
RefSeq	Brachyspira pilosicoli B2904 chromosome, complete genome	NC_018607.1	1133568
RefSeq	Brachyspira pilosicoli P43/6/78 chromosome, complete genome	NC_019908.1	1042417
RefSeq	Brachyspira pilosicoli WesB complete genome	NC_018604.1	1161918
RefSeq	Bradyrhizobium sp. BTAi1 plasmid pBBta01, complete sequence	NC_009475.1	288000
RefSeq	Bradyrhizobium sp. BTAi1 chromosome, complete genome	NC_009485.1	288000
RefSeq	Bradyrhizobium sp. ORS 278 chromosome, complete genome	NC_009445.1	114615
RefSeq	Bradyrhizobium sp. S23321, complete genome	NC_017082.1	335659
RefSeq	Bradyrhizobium japonicum USDA 110 chromosome, complete genome	NC_004463.1	224911
RefSeq	Bradyrhizobium japonicum USDA 6, complete genome	NC_017249.1	1037409
RefSeq	Brevibacillus brevis NBRC 100599, complete genome	NC_012491.1	358681
RefSeq	Brevundimonas subvibrioides ATCC 15264 chromosome, complete genome	NC_014375.1	633149
RefSeq	Brucella abortus A13334 chromosome 2, complete sequence	NC_016777.1	1104320
RefSeq	Brucella abortus A13334 chromosome 1, complete sequence	NC_016795.1	1104320
RefSeq	Brucella abortus S19 chromosome 2, complete sequence	NC_010740.1	430066
RefSeq	Brucella abortus S19 chromosome 1, complete sequence	NC_010742.1	430066
RefSeq	Brucella abortus bv. 1 str. 9-941 chromosome I, complete sequence	NC_006932.1	262698
RefSeq	Brucella abortus bv. 1 str. 9-941 chromosome II, complete sequence	NC_006933.1	262698
RefSeq	Brucella canis ATCC 23365 chromosome I, complete sequence	NC_010103.1	483179
RefSeq	Brucella canis ATCC 23365 chromosome II, complete sequence	NC_010104.1	483179
RefSeq	Brucella canis HSK A52141 chromosome 1, complete sequence	NC_016778.1	1104321
RefSeq	Brucella canis HSK A52141 chromosome 2, complete sequence	NC_016796.1	1104321
RefSeq	Brucella ceti TE10759-12 chromosome 1, complete sequence	NC_022905.1	1423891
RefSeq	Brucella ceti TE10759-12 chromosome 2, complete sequence	NC_022906.1	1423891
RefSeq	Brucella melitensis ATCC 23457 chromosome I, complete sequence	NC_012441.1	546272
RefSeq	Brucella melitensis ATCC 23457 chromosome II, complete sequence	NC_012442.1	546272
RefSeq	Brucella melitensis M28 chromosome chromosome 1, complete sequence	NC_017244.1	941967
RefSeq	Brucella melitensis M28 chromosome chromosome 2, complete sequence	NC_017245.1	941967
RefSeq	Brucella melitensis M5-90 chromosome chromosome I, complete sequence	NC_017246.1	703352
RefSeq	Brucella melitensis M5-90 chromosome chromosome II, complete sequence	NC_017247.1	703352
RefSeq	Brucella melitensis NI chromosome chromosome I, complete sequence	NC_017248.1	1029825
RefSeq	Brucella melitensis NI chromosome chromosome II, complete sequence	NC_017283.1	1029825
RefSeq	Brucella melitensis biovar Abortus 2308 chromosome I, complete sequence	NC_007618.1	359391
RefSeq	Brucella melitensis biovar Abortus 2308 chromosome II, complete sequence	NC_007624.1	359391
RefSeq	Brucella melitensis bv. 1 str. 16M chromosome I, complete sequence	NC_003317.1	224914
RefSeq	Brucella melitensis bv. 1 str. 16M chromosome II, complete sequence	NC_003318.1	224914
RefSeq	Brucella microti CCM 4915 chromosome 2, complete sequence	NC_013118.1	568815
RefSeq	Brucella microti CCM 4915 chromosome 1, complete sequence	NC_013119.1	568815
RefSeq	Brucella ovis ATCC 25840 chromosome II, complete sequence	NC_009504.1	444178
RefSeq	Brucella ovis ATCC 25840 chromosome I, complete sequence	NC_009505.1	444178
RefSeq	Brucella pinnipedialis B2/94 chromosome 1, complete sequence	NC_015857.1	520461
RefSeq	Brucella pinnipedialis B2/94 chromosome 2, complete sequence	NC_015858.1	520461
RefSeq	Brucella suis 1330 chromosome II, complete genome	NC_017250.1	204722
RefSeq	Brucella suis 1330 chromosome I, complete genome	NC_017251.1	204722
RefSeq	Brucella suis 1330 chromosome I, complete sequence	NC_004310.3	204722
RefSeq	Brucella suis 1330 chromosome II, complete sequence	NC_004311.2	204722
RefSeq	Brucella suis ATCC 23445 chromosome II, complete sequence	NC_010167.1	470137
RefSeq	Brucella suis ATCC 23445 chromosome I, complete sequence	NC_010169.1	470137
RefSeq	Brucella suis VBI22 chromosome II, complete sequence	NC_016775.1	1112912
RefSeq	Brucella suis VBI22 chromosome I, complete sequence	NC_016797.1	1112912
RefSeq	Buchnera aphidicola str. 5A (Acyrthosiphon pisum) chromosome, complete genome	NC_011833.1	563178
RefSeq	Buchnera aphidicola str. APS (Acyrthosiphon pisum) plasmid pTrp, complete sequence	NC_002252.1	107806
RefSeq	Buchnera aphidicola str. APS (Acyrthosiphon pisum) plasmid pLeu, complete sequence	NC_002253.1	107806
RefSeq	Buchnera aphidicola str. APS (Acyrthosiphon pisum) chromosome, complete genome	NC_002528.1	107806
RefSeq	Buchnera aphidicola str. Ak (Acyrthosiphon kondoi) chromosome, complete genome	NC_017256.1	1005090
RefSeq	Buchnera aphidicola str. Ak (Acyrthosiphon kondoi) plasmid pLeu, complete sequence	NC_017257.1	1005090
RefSeq	Buchnera aphidicola str. Ak (Acyrthosiphon kondoi) plasmid pTrp, complete sequence	NC_017258.1	1005090
RefSeq	Buchnera aphidicola str. Bp (Baizongia pistaciae) chromosome, complete genome	NC_004545.1	224915
RefSeq	Buchnera aphidicola str. Bp (Baizongia pistaciae) plasmid pBBp1, complete sequence	NC_004555.1	224915
RefSeq	Buchnera aphidicola str. Cc (Cinara cedri), complete genome	NC_008513.1	372461
RefSeq	Buchnera aphidicola BCc plasmid pLeu-BCc, complete sequence	NC_011878.1	372461
RefSeq	Buchnera aphidicola str. JF98 (Acyrthosiphon pisum) chromosome, complete genome	NC_017254.1	713600
RefSeq	Buchnera aphidicola str. JF99 (Acyrthosiphon pisum) chromosome, complete genome	NC_017253.1	713601
RefSeq	Buchnera aphidicola str. LL01 (Acyrthosiphon pisum) chromosome, complete genome	NC_017255.1	713603
RefSeq	Buchnera aphidicola str. Sg (Schizaphis graminum) chromosome, complete genome	NC_004061.1	198804
RefSeq	Buchnera aphidicola str. TLW03 (Acyrthosiphon pisum) chromosome, complete genome	NC_017252.1	713602
RefSeq	Buchnera aphidicola str. Tuc7 (Acyrthosiphon pisum) chromosome, complete genome	NC_011834.1	561501
RefSeq	Buchnera aphidicola str. Ua (Uroleucon ambrosiae) chromosome, complete genome	NC_017259.1	1005057
RefSeq	Buchnera aphidicola str. Ua (Uroleucon ambrosiae) plasmid pTrp, complete sequence	NC_017260.1	1005057
RefSeq	Buchnera aphidicola str. Ua (Uroleucon ambrosiae) plasmid pLeu, complete sequence	NC_017261.1	1005057
RefSeq	Buchnera aphidicola (Cinara tujafilina) chromosome, complete genome	NC_015662.1	261317
RefSeq	Burkholderia sp. 383 chromosome 3, complete sequence	NC_007509.1	482957
RefSeq	Burkholderia sp. 383 chromosome 1, complete sequence	NC_007510.1	482957
RefSeq	Burkholderia sp. 383 chromosome 2, complete sequence	NC_007511.1	482957
RefSeq	Burkholderia sp. CCGE1001 chromosome 1, complete sequence	NC_015136.1	640510
RefSeq	Burkholderia sp. CCGE1001 chromosome 2, complete sequence	NC_015137.1	640510
RefSeq	Burkholderia sp. CCGE1002 chromosome 1, complete sequence	NC_014117.1	640511
RefSeq	Burkholderia sp. CCGE1002 chromosome 2, complete sequence	NC_014118.1	640511
RefSeq	Burkholderia sp. CCGE1002 chromosome 3, complete sequence	NC_014119.1	640511
RefSeq	Burkholderia sp. CCGE1002 plasmid pBC201, complete sequence	NC_014120.1	640511
RefSeq	Burkholderia sp. CCGE1003 chromosome 1, complete sequence	NC_014539.1	640512
RefSeq	Burkholderia sp. CCGE1003 chromosome 2, complete sequence	NC_014540.1	640512
RefSeq	Burkholderia sp. KJ006 chromosome 1, complete sequence	NC_017920.1	416344
RefSeq	Burkholderia sp. KJ006 chromosome 2, complete sequence	NC_017921.1	416344
RefSeq	Burkholderia sp. KJ006 chromosome 3, complete sequence	NC_017922.1	416344
RefSeq	Burkholderia sp. KJ006 plasmid pKJ006, complete sequence	NC_017923.1	416344
RefSeq	Burkholderia sp. RPE64 DNA, chromosome 1, complete genome	NC_021287.1	758793
RefSeq	Burkholderia sp. RPE64 DNA, chromosome 3, complete genome	NC_021288.1	758793
RefSeq	Burkholderia sp. RPE64 plasmid p1 DNA, complete genome	NC_021289.1	758793
RefSeq	Burkholderia sp. RPE64 DNA, chromosome 2, complete genome	NC_021294.1	758793
RefSeq	Burkholderia sp. RPE64 plasmid p2 DNA, complete genome	NC_021295.1	758793
RefSeq	Burkholderia sp. YI23 chromosome 1, complete sequence	NC_016589.1	1097668
RefSeq	Burkholderia sp. YI23 chromosome 3, complete sequence	NC_016590.1	1097668
RefSeq	Burkholderia sp. YI23 plasmid byi_2p, complete sequence	NC_016591.1	1097668
RefSeq	Burkholderia sp. YI23 plasmid byi_3p, complete sequence	NC_016592.1	1097668
RefSeq	Burkholderia sp. YI23 chromosome 2, complete sequence	NC_016625.1	1097668
RefSeq	Burkholderia sp. YI23 plasmid byi_1p, complete sequence	NC_016626.1	1097668
RefSeq	Burkholderia cepacia AMMD plasmid 1, complete sequence	NC_008385.1	339670
RefSeq	Burkholderia ambifaria AMMD chromosome 1, complete sequence	NC_008390.1	339670
RefSeq	Burkholderia ambifaria AMMD chromosome 2, complete sequence	NC_008391.1	339670
RefSeq	Burkholderia ambifaria AMMD chromosome 3, complete sequence	NC_008392.1	339670
RefSeq	Burkholderia ambifaria MC40-6 chromosome 1, complete sequence	NC_010551.1	398577
RefSeq	Burkholderia ambifaria MC40-6 chromosome 2, complete sequence	NC_010552.1	398577
RefSeq	Burkholderia ambifaria MC40-6 plasmid pBMC401, complete sequence	NC_010553.1	398577
RefSeq	Burkholderia ambifaria MC40-6 chromosome 3, complete sequence	NC_010557.1	398577
RefSeq	Burkholderia cenocepacia AU 1054 chromosome 1, complete sequence	NC_008060.1	331271
RefSeq	Burkholderia cenocepacia AU 1054 chromosome 2, complete sequence	NC_008061.1	331271
RefSeq	Burkholderia cenocepacia AU 1054 chromosome 3, complete sequence	NC_008062.1	331271
RefSeq	Burkholderia cenocepacia HI2424 chromosome 1, complete sequence	NC_008542.1	331272
RefSeq	Burkholderia cenocepacia HI2424 chromosome 2, complete sequence	NC_008543.1	331272
RefSeq	Burkholderia cenocepacia HI2424 chromosome 3, complete sequence	NC_008544.1	331272
RefSeq	Burkholderia cenocepacia HI2424 plasmid 1, complete sequence	NC_008545.1	331272
RefSeq	Burkholderia cenocepacia J2315 chromosome 1, complete sequence	NC_011000.1	216591
RefSeq	Burkholderia cenocepacia J2315 chromosome 2, complete sequence	NC_011001.1	216591
RefSeq	Burkholderia cenocepacia J2315 chromosome 3, complete sequence	NC_011002.1	216591
RefSeq	Burkholderia cenocepacia J2315 plasmid pBCJ2315, complete sequence	NC_011003.1	216591
RefSeq	Burkholderia cenocepacia MC0-3 chromosome 1, complete sequence	NC_010508.1	406425
RefSeq	Burkholderia cenocepacia MC0-3 chromosome 3, complete sequence	NC_010512.1	406425
RefSeq	Burkholderia cenocepacia MC0-3 chromosome 2, complete sequence	NC_010515.1	406425
RefSeq	Burkholderia cepacia GG4 chromosome 1, complete sequence	NC_018513.1	1009846
RefSeq	Burkholderia cepacia GG4 chromosome 2, complete sequence	NC_018514.1	1009846
RefSeq	Burkholderia gladioli BSR3 chromosome 2, complete sequence	NC_015376.1	999541
RefSeq	Burkholderia gladioli BSR3 plasmid bgla_2p, complete sequence	NC_015377.1	999541
RefSeq	Burkholderia gladioli BSR3 plasmid bgla_3p, complete sequence	NC_015378.1	999541
RefSeq	Burkholderia gladioli BSR3 chromosome 1, complete sequence	NC_015381.1	999541
RefSeq	Burkholderia gladioli BSR3 plasmid bgla_1p, complete sequence	NC_015382.1	999541
RefSeq	Burkholderia gladioli BSR3 plasmid bgla_4p, complete sequence	NC_015383.1	999541
RefSeq	Burkholderia glumae BGR1 plasmid bglu_2p, complete sequence	NC_012718.1	626418
RefSeq	Burkholderia glumae BGR1 plasmid bglu_3p, complete sequence	NC_012720.2	626418
RefSeq	Burkholderia glumae BGR1 chromosome 2, complete sequence	NC_012721.2	626418
RefSeq	Burkholderia glumae BGR1 plasmid bglu_1p, complete sequence	NC_012723.1	626418
RefSeq	Burkholderia glumae BGR1 chromosome 1, complete sequence	NC_012724.2	626418
RefSeq	Burkholderia glumae BGR1 plasmid bglu_4p, complete sequence	NC_012725.2	626418
RefSeq	Burkholderia mallei ATCC 23344 chromosome 1, complete sequence	NC_006348.1	243160
RefSeq	Burkholderia mallei ATCC 23344 chromosome 2, complete sequence	NC_006349.2	243160
RefSeq	Burkholderia mallei NCTC 10229 chromosome II, complete sequence	NC_008835.1	412022
RefSeq	Burkholderia mallei NCTC 10229 chromosome I, complete sequence	NC_008836.1	412022
RefSeq	Burkholderia mallei NCTC 10247 chromosome II, complete sequence	NC_009079.1	320389
RefSeq	Burkholderia mallei NCTC 10247 chromosome I, complete sequence	NC_009080.1	320389
RefSeq	Burkholderia mallei SAVP1 chromosome II, complete sequence	NC_008784.1	320388
RefSeq	Burkholderia mallei SAVP1 chromosome I, complete sequence	NC_008785.1	320388
RefSeq	Burkholderia multivorans ATCC 17616 plasmid pBMUL01, complete sequence	NC_010070.1	395019
RefSeq	Burkholderia multivorans ATCC 17616 chromosome 1, complete sequence	NC_010084.1	395019
RefSeq	Burkholderia multivorans ATCC 17616 chromosome 2, complete sequence	NC_010086.1	395019
RefSeq	Burkholderia multivorans ATCC 17616 chromosome 3, complete sequence	NC_010087.1	395019
RefSeq	Burkholderia multivorans ATCC 17616 chromosome 3, complete sequence	NC_010801.1	395019
RefSeq	Burkholderia multivorans ATCC 17616 plasmid pTGL1, complete sequence	NC_010802.1	395019
RefSeq	Burkholderia multivorans ATCC 17616 chromosome 1, complete sequence	NC_010804.1	395019
RefSeq	Burkholderia multivorans ATCC 17616 chromosome 2, complete genome	NC_010805.1	395019
RefSeq	Burkholderia phenoliruptrix BR3459a chromosome 2, complete sequence	NC_018672.1	1229205
RefSeq	Burkholderia phenoliruptrix BR3459a chromosome 1, complete sequence	NC_018695.1	1229205
RefSeq	Burkholderia phenoliruptrix BR3459a plasmid pSYMBR3459, complete sequence	NC_018696.1	1229205
RefSeq	Burkholderia phymatum STM815 chromosome 1, complete sequence	NC_010622.1	391038
RefSeq	Burkholderia phymatum STM815 chromosome 2, complete sequence	NC_010623.1	391038
RefSeq	Burkholderia phymatum STM815 plasmid pBPHY01, complete sequence	NC_010625.1	391038
RefSeq	Burkholderia phymatum STM815 plasmid pBPHY02, complete sequence	NC_010627.1	391038
RefSeq	Burkholderia phytofirmans PsJN chromosome 2, complete sequence	NC_010676.1	398527
RefSeq	Burkholderia phytofirmans PsJN plasmid pBPHYT01, complete sequence	NC_010679.1	398527
RefSeq	Burkholderia phytofirmans PsJN chromosome 1, complete sequence	NC_010681.1	398527
RefSeq	Burkholderia pseudomallei 1026b chromosome 1, complete sequence	NC_017831.1	884204
RefSeq	Burkholderia pseudomallei 1026b chromosome 2, complete sequence	NC_017832.1	884204
RefSeq	Burkholderia pseudomallei 1106a chromosome I, complete sequence	NC_009076.1	357348
RefSeq	Burkholderia pseudomallei 1106a chromosome II, complete sequence	NC_009078.1	357348
RefSeq	Burkholderia pseudomallei 1710b chromosome I, complete sequence	NC_007434.1	320372
RefSeq	Burkholderia pseudomallei 1710b chromosome II, complete sequence	NC_007435.1	320372
RefSeq	Burkholderia pseudomallei 668 chromosome I, complete sequence	NC_009074.1	320373
RefSeq	Burkholderia pseudomallei 668 chromosome chromosome II, complete sequence	NC_009075.1	320373
RefSeq	Burkholderia pseudomallei BPC006 chromosome I, complete sequence	NC_018527.1	1229785
RefSeq	Burkholderia pseudomallei BPC006 chromosome II, complete sequence	NC_018529.1	1229785
RefSeq	Burkholderia pseudomallei K96243 chromosome 1, complete sequence	NC_006350.1	272560
RefSeq	Burkholderia pseudomallei K96243 chromosome 2, complete sequence	NC_006351.1	272560
RefSeq	Burkholderia pseudomallei MSHR305 chromosome 1, complete sequence	NC_021877.1	1335307
RefSeq	Burkholderia pseudomallei MSHR305 chromosome 2, complete sequence	NC_021884.1	1335307
RefSeq	Burkholderia pseudomallei MSHR346 chromosome I, complete sequence	NC_012695.1	536230
RefSeq	Burkholderia pseudomallei NCTC 13179 chromosome 2, complete sequence	NC_022658.1	1241583
RefSeq	Burkholderia pseudomallei NCTC 13179 chromosome 1, complete sequence	NC_022659.1	1241583
RefSeq	Burkholderia rhizoxinica HKI 454 plasmid pBRH01, complete sequence	NC_014718.1	882378
RefSeq	Burkholderia rhizoxinica HKI 454 chromosome, complete genome	NC_014722.1	882378
RefSeq	Burkholderia rhizoxinica HKI 454 plasmid pBRH02, complete sequence	NC_014723.1	882378
RefSeq	Burkholderia thailandensis E264 chromosome II, complete sequence	NC_007650.1	271848
RefSeq	Burkholderia thailandensis E264 chromosome I, complete sequence	NC_007651.1	271848
RefSeq	Burkholderia thailandensis MSMB121 chromosome 1, complete sequence	NC_021173.1	1249661
RefSeq	Burkholderia thailandensis MSMB121 chromosome 2, complete sequence	NC_021174.1	1249661
RefSeq	Burkholderia vietnamiensis G4 plasmid pBVIE05, complete sequence	NC_009226.1	269482
RefSeq	Burkholderia vietnamiensis G4 plasmid pBVIE02, complete sequence	NC_009227.1	269482
RefSeq	Burkholderia vietnamiensis G4 plasmid pBVIE04, complete sequence	NC_009228.1	269482
RefSeq	Burkholderia vietnamiensis G4 plasmid pBVIE03, complete sequence	NC_009229.1	269482
RefSeq	Burkholderia vietnamiensis G4 plasmid pBVIE01, complete sequence	NC_009230.1	269482
RefSeq	Burkholderia vietnamiensis G4 chromosome 3, complete sequence	NC_009254.1	269482
RefSeq	Burkholderia vietnamiensis G4 chromosome 2, complete sequence	NC_009255.1	269482
RefSeq	Burkholderia vietnamiensis G4 chromosome 1, complete sequence	NC_009256.1	269482
RefSeq	Burkholderia xenovorans LB400 chromosome 1, complete sequence	NC_007951.1	266265
RefSeq	Burkholderia xenovorans LB400 chromosome 2, complete sequence	NC_007952.1	266265
RefSeq	Burkholderia xenovorans LB400 chromosome 3, complete genome	NC_007953.1	266265
RefSeq	Butyrivibrio proteoclasticus B316 chromosome 1, complete genome	NC_014387.1	515622
RefSeq	Butyrivibrio proteoclasticus B316 chromosome 2, complete genome	NC_014388.1	515622
RefSeq	Butyrivibrio proteoclasticus B316 plasmid pCY360, complete sequence	NC_014389.1	515622
RefSeq	Butyrivibrio proteoclasticus B316 plasmid pCY186, complete sequence	NC_014390.1	515622
RefSeq	Caldicellulosiruptor bescii DSM 6725 chromosome, complete genome	NC_012034.1	521460
RefSeq	Caldicellulosiruptor bescii DSM 6725 plasmid pATHE01, complete sequence	NC_012036.1	521460
RefSeq	Caldicellulosiruptor bescii DSM 6725 plasmid pATHE02, complete sequence	NC_012037.1	521460
RefSeq	Caldicellulosiruptor hydrothermalis 108 chromosome, complete genome	NC_014652.1	632292
RefSeq	Caldicellulosiruptor kristjanssonii I77R1B plasmid pCALKR01, complete sequence	NC_014719.1	632335
RefSeq	Caldicellulosiruptor kristjanssonii I77R1B chromosome, complete genome	NC_014721.1	632335
RefSeq	Caldicellulosiruptor kronotskyensis 2002 chromosome, complete genome	NC_014720.1	632348
RefSeq	Caldicellulosiruptor lactoaceticus 6A chromosome, complete genome	NC_015949.1	632516
RefSeq	Caldicellulosiruptor obsidiansis OB47 chromosome, complete genome	NC_014392.1	608506
RefSeq	Caldicellulosiruptor owensensis OL chromosome, complete genome	NC_014657.1	632518
RefSeq	Caldicellulosiruptor saccharolyticus DSM 8903 chromosome, complete genome	NC_009437.1	351627
RefSeq	Caldilinea aerophila DSM 14535 = NBRC 104270, complete genome	NC_017079.1	926550
RefSeq	Caldisericum exile AZM16c01, complete genome	NC_017096.1	511051
RefSeq	Caldisphaera lagunensis DSM 15908 chromosome, complete genome	NC_019791.1	1056495
RefSeq	Calditerrivibrio nitroreducens DSM 19672 plasmid pCALNI01, complete sequence	NC_014749.1	768670
RefSeq	Calditerrivibrio nitroreducens DSM 19672 chromosome, complete genome	NC_014758.1	768670
RefSeq	Caldivirga maquilingensis IC-167 chromosome, complete genome	NC_009954.1	397948
RefSeq	Calothrix sp. PCC 6303 plasmid pCAL6303.01, complete sequence	NC_019727.1	1170562
RefSeq	Calothrix sp. PCC 6303 plasmid pCAL6303.02, complete sequence	NC_019728.1	1170562
RefSeq	Calothrix sp. PCC 6303 chromosome, complete genome	NC_019751.1	1170562
RefSeq	Calothrix sp. PCC 6303 plasmid pCAL6303.03, complete sequence	NC_019752.1	1170562
RefSeq	Calothrix sp. PCC 7507 chromosome, complete genome	NC_019682.1	99598
RefSeq	Campylobacter fetus subsp. testudinum 03-427 chromosome, complete genome	NC_022759.1	1244528
RefSeq	Campylobacter coli 15-537360 plasmid pCC42yr, complete sequence	NC_022656.1	1358410
RefSeq	Campylobacter coli 15-537360, complete genome	NC_022660.1	1358410
RefSeq	Campylobacter coli 76339, complete genome	NC_022132.1	1367491
RefSeq	Campylobacter coli CVM N29710, complete genome	NC_022347.1	1273173
RefSeq	Campylobacter coli CVM N29710 plasmid pN29710-2, complete sequence	NC_022348.1	1273173
RefSeq	Campylobacter coli CVM N29710 plasmid pN29710-1, complete sequence	NC_022355.1	1273173
RefSeq	Campylobacter concisus 13826 plasmid pCCON31, complete sequence	NC_009795.1	360104
RefSeq	Campylobacter concisus 13826 plasmid pCCON16, complete sequence	NC_009796.1	360104
RefSeq	Campylobacter concisus 13826, complete genome	NC_009802.1	360104
RefSeq	Campylobacter curvus 525.92 chromosome, complete genome	NC_009715.1	360105
RefSeq	Campylobacter fetus subsp. fetus 82-40 chromosome, complete genome	NC_008599.1	360106
RefSeq	Campylobacter hominis ATCC BAA-381 plasmid pCH4, complete sequence	NC_009713.1	360107
RefSeq	Campylobacter hominis ATCC BAA-381, complete genome	NC_009714.1	360107
RefSeq	Campylobacter jejuni subsp. jejuni 00-2544 plasmid, complete sequence	NC_022354.1	1383068
RefSeq	Campylobacter jejuni 4031 genome sequence	NC_022529.1	1347340
RefSeq	Campylobacter jejuni subsp. jejuni 81116, complete genome	NC_009839.1	407148
RefSeq	Campylobacter jejuni subsp. jejuni 81-176 plasmid pVir, complete sequence	NC_008770.1	354242
RefSeq	Campylobacter jejuni subsp. jejuni 81-176 chromosome, complete genome	NC_008787.1	354242
RefSeq	Campylobacter jejuni subsp. jejuni 81-176 plasmid pTet, complete sequence	NC_008790.1	354242
RefSeq	Campylobacter jejuni subsp. jejuni IA3902 chromosome, complete genome	NC_017279.1	567106
RefSeq	Campylobacter jejuni subsp. jejuni IA3902 plasmid pVir, complete sequence	NC_017284.1	567106
RefSeq	Campylobacter jejuni subsp. jejuni ICDCCJ07001 plasmid pTet, complete sequence	NC_014801.1	757425
RefSeq	Campylobacter jejuni subsp. jejuni M1 chromosome, complete genome	NC_017280.1	645464
RefSeq	Campylobacter jejuni subsp. jejuni NCTC 11168-BN148, complete genome	NC_018521.1	1211776
RefSeq	Campylobacter jejuni subsp. jejuni NCTC 11168 = ATCC 700819 chromosome, complete genome	NC_002163.1	192222
RefSeq	Campylobacter jejuni RM1221, complete genome	NC_003912.7	195099
RefSeq	Campylobacter jejuni subsp. jejuni S3 chromosome, complete genome	NC_017281.1	718271
RefSeq	Campylobacter jejuni subsp. jejuni S3 plasmid pTet, complete sequence	NC_017282.1	718271
RefSeq	Campylobacter jejuni subsp. doylei 269.97 chromosome, complete genome	NC_009707.1	360109
RefSeq	Campylobacter lari RM2100, complete genome	NC_012039.1	306263
RefSeq	Campylobacter lari RM2100 megaplasmid pCL2100, complete sequence	NC_012040.1	306263
RefSeq	Candidatus Accumulibacter phosphatis clade IIA str. UW-1 plasmid pAph02, complete sequence	NC_013190.1	522306
RefSeq	Candidatus Accumulibacter phosphatis clade IIA str. UW-1 plasmid pAph03, complete sequence	NC_013191.1	522306
RefSeq	Candidatus Accumulibacter phosphatis clade IIA str. UW-1 plasmid pAph01, complete sequence	NC_013193.1	522306
RefSeq	Candidatus Accumulibacter phosphatis clade IIA str. UW-1 chromosome, complete genome	NC_013194.1	522306
RefSeq	Candidatus Amoebophilus asiaticus 5a2 chromosome, complete genome	NC_010830.1	452471
RefSeq	Candidatus Arthromitus sp. SFB-mouse-Japan, complete genome	NC_015913.1	1029718
RefSeq	Candidatus Arthromitus sp. SFB-mouse-Yit, complete genome	NC_017294.1	1041809
RefSeq	Candidatus Arthromitus sp. SFB-rat-Yit, complete genome	NC_016012.1	1041504
RefSeq	Candidatus Azobacteroides pseudotrichonymphae genomovar. CFP2 plasmid pCFPG2, complete sequence	NC_011561.1	511995
RefSeq	Candidatus Azobacteroides pseudotrichonymphae genomovar. CFP2 plasmid pCFPG3, complete sequence	NC_011562.1	511995
RefSeq	Candidatus Azobacteroides pseudotrichonymphae genomovar. CFP2 plasmid pCFPG4, complete sequence	NC_011563.1	511995
RefSeq	Candidatus Azobacteroides pseudotrichonymphae genomovar. CFP2 plasmid pCFPG1, complete sequence	NC_011564.1	511995
RefSeq	Candidatus Azobacteroides pseudotrichonymphae genomovar. CFP2 chromosome, complete genome	NC_011565.1	511995
RefSeq	Candidatus Blochmannia chromaiodes str. 640 chromosome, complete genome	NC_020075.1	1240471
RefSeq	Candidatus Blochmannia floridanus chromosome, complete genome	NC_005061.1	203907
RefSeq	Candidatus Blochmannia pennsylvanicus str. BPEN chromosome, complete genome	NC_007292.1	291272
RefSeq	Candidatus Blochmannia vafer str. BVAF chromosome, complete genome	NC_014909.2	859654
RefSeq	Candidatus Carsonella ruddii HT isolate Thao2000 chromosome, complete genome	NC_018417.1	1202539
RefSeq	Candidatus Chloracidobacterium thermophilum B chromosome chromosome 1, complete sequence	NC_016024.1	981222
RefSeq	Candidatus Chloracidobacterium thermophilum B chromosome chromosome 2, complete sequence	NC_016025.1	981222
RefSeq	Candidatus Cloacamonas acidaminovorans str. Evry provisional genome sequence from WWE1 candidate division	NC_020449.1	459349
RefSeq	Candidatus Desulforudis audaxviator MP104C chromosome, complete genome	NC_010424.1	477974
RefSeq	Candidatus Hamiltonella defensa 5AT (Acyrthosiphon pisum) chromosome, complete genome	NC_012751.1	572265
RefSeq	Candidatus Hamiltonella defensa 5AT (Acyrthosiphon pisum) plasmid pHD5AT, complete sequence	NC_012752.1	572265
RefSeq	Candidatus Kinetoplastibacterium blastocrithidii TCC012E, complete genome	NC_020285.1	1208922
RefSeq	Candidatus Kinetoplastibacterium blastocrithidii (ex Strigomonas culicis) chromosome, complete genome	NC_019814.1	1208923
RefSeq	Candidatus Kinetoplastibacterium crithidii TCC036E, complete genome	NC_020283.1	1208918
RefSeq	Candidatus Kinetoplastibacterium crithidii (ex Angomonas deanei ATCC 30255), complete genome	NC_019815.1	1267577
RefSeq	Candidatus Kinetoplastibacterium desouzaii TCC079E, complete genome	NC_020294.1	1208919
RefSeq	Candidatus Kinetoplastibacterium galatii TCC219, complete genome	NC_020284.1	1208921
RefSeq	Candidatus Kinetoplastibacterium oncopeltii TCC290E, complete genome	NC_020299.1	1208920
RefSeq	Candidatus Korarchaeum cryptofilum OPF8 chromosome, complete genome	NC_010482.1	374847
RefSeq	Candidatus Koribacter versatilis Ellin345 chromosome, complete genome	NC_008009.1	204669
RefSeq	Candidatus Liberibacter americanus str. Sao Paulo, complete genome	NC_022793.1	1261131
RefSeq	Candidatus Liberibacter asiaticus str. gxpsy, complete genome	NC_020549.1	1174529
RefSeq	Candidatus Liberibacter asiaticus str. psy62 chromosome, complete genome	NC_012985.3	537021
RefSeq	Candidatus Liberibacter solanacearum CLso-ZC1 chromosome, complete genome	NC_014774.1	658172
RefSeq	Candidatus Midichloria mitochondrii IricVA chromosome, complete genome	NC_015722.1	696127
RefSeq	Candidatus Moranella endobia PCIT chromosome, complete genome	NC_015735.1	903503
RefSeq	Candidatus Moranella endobia PCVAL, complete genome	NC_021057.1	1234603
RefSeq	Candidatus Mycoplasma haemominutum 'Birmingham 1' noncontiguous finished genome	NC_021007.1	1116213
RefSeq	Candidatus Nitrosopumilus sp. AR2 chromosome, complete genome	NC_018656.1	1229909
RefSeq	Candidatus Nitrospira defluvii, complete genome	NC_014355.1	330214
RefSeq	Candidatus Pelagibacter sp. IMCC9063 chromosome, complete genome	NC_015380.1	1002672
RefSeq	Candidatus Pelagibacter ubique HTCC1062 chromosome, complete genome	NC_007205.1	335992
RefSeq	Candidatus Phytoplasma australiense, complete genome	NC_010544.1	59748
RefSeq	Candidatus Phytoplasma mali chromosome, complete genome	NC_011047.1	37692
RefSeq	Candidatus Portiera aleyrodidarum BT-B chromosome, complete genome	NC_018507.1	1206109
RefSeq	Candidatus Portiera aleyrodidarum BT-B-HRs chromosome, complete genome	NC_018677.1	1206109
RefSeq	Candidatus Portiera aleyrodidarum BT-QVLC chromosome, complete genome	NC_018618.1	1239881
RefSeq	Candidatus Portiera aleyrodidarum BT-QVLC chromosome, complete genome	NC_018676.1	1239881
RefSeq	Candidatus Protochlamydia amoebophila UWE25 chromosome, complete genome	NC_005861.1	264201
RefSeq	Candidatus Puniceispirillum marinum IMCC1322 chromosome, complete genome	NC_014010.1	488538
RefSeq	Candidatus Rickettsia amblyommii str. GAT-30V plasmid pMCE_1, complete sequence	NC_017020.1	1105111
RefSeq	Candidatus Rickettsia amblyommii str. GAT-30V plasmid pMCE_3, complete sequence	NC_017021.1	1105111
RefSeq	Candidatus Rickettsia amblyommii str. GAT-30V chromosome, complete genome	NC_017028.1	1105111
RefSeq	Candidatus Rickettsia amblyommii str. GAT-30V plasmid pMCE_2, complete sequence	NC_017029.1	1105111
RefSeq	Candidatus Riesia pediculicola USDA plasmid pPAN, complete sequence	NC_013962.1	515618
RefSeq	Candidatus Riesia pediculicola USDA chromosome, complete genome	NC_014109.1	515618
RefSeq	Candidatus Ruthia magnifica str. Cm (Calyptogena magnifica), complete genome	NC_008610.1	413404
RefSeq	Candidatus Saccharibacteria bacterium RAAC3_TM7_1, complete genome	NC_023004.1	1394711
RefSeq	Candidatus Solibacter usitatus Ellin6076 chromosome, complete genome	NC_008536.1	234267
RefSeq	Candidatus Tremblaya phenacola PAVE plasmid, complete sequence	NC_021553.1	1266371
RefSeq	Candidatus Vesicomyosocius okutanii HA, complete genome	NC_009465.1	412965
RefSeq	Capnocytophaga canimorsus Cc5 chromosome, complete genome	NC_015846.1	860228
RefSeq	Capnocytophaga ochracea DSM 7271 chromosome, complete genome	NC_013162.1	521097
RefSeq	Carboxydothermus hydrogenoformans Z-2901 chromosome, complete genome	NC_007503.1	246194
RefSeq	Cardinium endosymbiont cEper1 of Encarsia pergandiella, complete genome	NC_018605.1	1231626
RefSeq	Cardinium endosymbiont cEper1 of Encarsia pergandiella plasmid pCher, complete sequence	NC_018606.1	1231626
RefSeq	Carnobacterium sp. 17-4 plasmid pCAR50, complete sequence	NC_015390.1	208596
RefSeq	Carnobacterium sp. 17-4 chromosome, complete genome	NC_015391.1	208596
RefSeq	Carnobacterium sp. WN1359 plasmid pWNCR12, complete sequence	NC_022601.1	1266845
RefSeq	Carnobacterium sp. WN1359 plasmid pWNCR47, complete sequence	NC_022602.1	1266845
RefSeq	Carnobacterium sp. WN1359 plasmid pWNCR64, complete sequence	NC_022603.1	1266845
RefSeq	Carnobacterium sp. WN1359, complete genome	NC_022606.1	1266845
RefSeq	Carnobacterium sp. WN1359 plasmid pWNCR15, complete sequence	NC_022607.1	1266845
RefSeq	Carnobacterium sp. WN1359 plasmid pWNCR9, complete sequence	NC_022608.1	1266845
RefSeq	Carnobacterium maltaromaticum LMA28 complete genome	NC_019425.2	1234679
RefSeq	Catenulispora acidiphila DSM 44928 chromosome, complete genome	NC_013131.1	479433
RefSeq	Caulobacter sp. K31 plasmid pCAUL02, complete sequence	NC_010333.1	366602
RefSeq	Caulobacter sp. K31 plasmid pCAUL01, complete sequence	NC_010335.1	366602
RefSeq	Caulobacter sp. K31 chromosome, complete genome	NC_010338.1	366602
RefSeq	Caulobacter crescentus CB15 chromosome, complete genome	NC_002696.2	190650
RefSeq	Caulobacter crescentus NA1000, complete genome	NC_011916.1	565050
RefSeq	Caulobacter segnis ATCC 21756 chromosome, complete genome	NC_014100.1	509190
RefSeq	Cellulomonas fimi ATCC 484 chromosome, complete genome	NC_015514.1	590998
RefSeq	Cellulomonas flavigena DSM 20109 chromosome, complete genome	NC_014151.1	446466
RefSeq	Cellulophaga algicola DSM 14237 chromosome, complete genome	NC_014934.1	688270
RefSeq	Cellulophaga lytica DSM 7489 chromosome, complete genome	NC_015167.1	867900
RefSeq	Cellvibrio japonicus Ueda107 chromosome, complete genome	NC_010995.1	498211
RefSeq	Chamaesiphon minutus PCC 6605, complete genome	NC_019697.1	1173020
RefSeq	Chamaesiphon minutus PCC 6605 plasmid pCHA6605.02, complete sequence	NC_019698.1	1173020
RefSeq	Chamaesiphon minutus PCC 6605 plasmid pCHA6605.01, partial sequence	NC_020053.1	1173020
RefSeq	Mesorhizobium sp. BNC1 plasmid 1, complete sequence	NC_008242.1	266779
RefSeq	Mesorhizobium sp. BNC1 plasmid 2, complete sequence	NC_008243.1	266779
RefSeq	Chelativorans sp. BNC1 plasmid 3, complete sequence	NC_008244.1	266779
RefSeq	Chelativorans sp. BNC1 chromosome, complete genome	NC_008254.1	266779
RefSeq	Chitinophaga pinensis DSM 2588 chromosome, complete genome	NC_013132.1	485918
RefSeq	Chlamydia muridarum Nigg plasmid pMoPn, complete sequence	NC_002182.1	243161
RefSeq	Chlamydia muridarum Nigg, complete genome	NC_002620.2	243161
RefSeq	Chlamydia pecorum P787, complete genome	NC_022441.1	1234369
RefSeq	Chlamydia pecorum PV3056/3, complete genome	NC_022439.1	1234367
RefSeq	Chlamydia pecorum W73, complete genome	NC_022440.1	1234368
RefSeq	Chlamydia psittaci 01DC12, complete genome	NC_019391.1	1221877
RefSeq	Chlamydia psittaci 01DC12 plasmid p01DC12, complete sequence	NC_019392.1	1221877
RefSeq	Chlamydia psittaci 84/55 chromosome, complete genome	NC_018619.1	1218176
RefSeq	Chlamydia psittaci 84/55 plasmid pcp8455, complete sequence	NC_018633.1	1218176
RefSeq	Chlamydia psittaci CP3 chromosome, complete genome	NC_018625.1	1050219
RefSeq	Chlamydia psittaci CP3 plasmid pcpCP3, complete sequence	NC_018634.1	1050219
RefSeq	Chlamydia psittaci GR9 chromosome, complete genome	NC_018620.1	1218353
RefSeq	Chlamydia psittaci M56 chromosome, complete genome	NC_018623.1	1218357
RefSeq	Chlamydia psittaci M56 plasmid pcpM56, complete sequence	NC_018635.1	1218357
RefSeq	Chlamydia psittaci MN chromosome, complete genome	NC_018627.1	1218354
RefSeq	Chlamydia psittaci MN plasmid pcpMN, complete sequence	NC_018636.1	1218354
RefSeq	Chlamydia psittaci NJ1 chromosome, complete genome	NC_018626.1	1050221
RefSeq	Chlamydia psittaci NJ1 plasmid pcpNJ1, complete sequence	NC_018637.1	1050221
RefSeq	Chlamydia psittaci VS225 chromosome, complete genome	NC_018621.1	1218355
RefSeq	Chlamydia psittaci VS225 plasmid pcpVS225, complete sequence	NC_018638.1	1218355
RefSeq	Chlamydia psittaci WC chromosome, complete genome	NC_018624.1	1218358
RefSeq	Chlamydia psittaci WC plasmid pcpWC, complete sequence	NC_018639.1	1218358
RefSeq	Chlamydia psittaci WS/RT/E30 chromosome, complete genome	NC_018622.1	1218356
RefSeq	Chlamydia psittaci WS/RT/E30 plasmid pcpWSRTE30, complete sequence	NC_018640.1	1218356
RefSeq	Chlamydia trachomatis 434/Bu chromosome, complete genome	NC_010287.1	471472
RefSeq	Chlamydia trachomatis A2497, complete genome	NC_016798.1	580047
RefSeq	Chlamydia trachomatis A2497 chromosome, complete genome	NC_017437.1	580047
RefSeq	Chlamydia trachomatis A2497 plasmid0001, complete sequence	NC_017438.1	580047
RefSeq	Chlamydia trachomatis A/363 plasmid pA363, complete sequence	NC_019272.1	1071753
RefSeq	Chlamydia trachomatis A/363 complete genome	NC_020966.1	1071753
RefSeq	Chlamydia trachomatis A/5291 complete genome	NC_020939.1	1071754
RefSeq	Chlamydia trachomatis A/5291 plasmid pA5291, complete sequence	NC_020946.1	1071754
RefSeq	Chlamydia trachomatis A/7249 complete genome	NC_020944.1	1071755
RefSeq	Chlamydia trachomatis A/7249 plasmid pA7249, complete sequence	NC_020979.1	1071755
RefSeq	Chlamydia trachomatis A/HAR-13, complete genome	NC_007429.1	315277
RefSeq	Chlamydia trachomatis A/HAR-13 plasmid pCTA, complete sequence	NC_007430.1	315277
RefSeq	Chlamydia trachomatis B/Jali20/OT chromosome, complete genome	NC_012686.1	580049
RefSeq	Chlamydia trachomatis B/TZ1A828/OT chromosome, complete genome	NC_012687.1	672161
RefSeq	Chlamydia trachomatis C/TW-3 plasmid unnamed, complete sequence	NC_023057.1	1431547
RefSeq	Chlamydia trachomatis C/TW-3, complete genome	NC_023060.1	1431547
RefSeq	Chlamydia trachomatis D-EC chromosome, complete genome	NC_017434.1	759363
RefSeq	Chlamydia trachomatis D-EC plasmid pCTDEC1, complete sequence	NC_017435.1	759363
RefSeq	Chlamydia trachomatis D-LC plasmid pCTDLC1, complete sequence	NC_017433.1	759364
RefSeq	Chlamydia trachomatis D-LC chromosome, complete genome	NC_017436.1	759364
RefSeq	Chlamydia trachomatis D/SotonD1 high quality draft genome sequence	NC_020967.1	1071756
RefSeq	Chlamydia trachomatis D/SotonD1 plasmid pSotonD1, complete sequence	NC_020986.1	1071756
RefSeq	Chlamydia trachomatis D/SotonD5 complete genome	NC_020943.1	1071757
RefSeq	Chlamydia trachomatis D/SotonD5 plasmid pSotonD5, complete sequence	NC_020958.1	1071757
RefSeq	Chlamydia trachomatis D/SotonD6 plasmid pSotonD6, complete sequence	NC_020959.1	1071758
RefSeq	Chlamydia trachomatis D/SotonD6 high quality draft genome sequence	NC_020968.1	1071758
RefSeq	Chlamydia trachomatis D/UW-3/CX chromosome, complete genome	NC_000117.1	272561
RefSeq	Chlamydia trachomatis E/11023 chromosome, complete genome	NC_017431.1	707183
RefSeq	Chlamydia trachomatis E/150 chromosome, complete genome	NC_017439.1	707184
RefSeq	Chlamydia trachomatis E/Bour plasmid pBour, complete sequence	NC_020947.1	596777
RefSeq	Chlamydia trachomatis E/Bour complete genome	NC_020971.1	596777
RefSeq	Chlamydia trachomatis E/C599 high quality draft genome sequence	NC_022537.1	1100832
RefSeq	Chlamydia trachomatis plasmid pSW3, complete sequence	NC_012631.1	813
RefSeq	Chlamydia trachomatis E/SW3, complete genome	NC_017952.1	1071759
RefSeq	Chlamydia trachomatis E/SotonE4 complte genome	NC_020969.1	1071760
RefSeq	Chlamydia trachomatis E/SotonE4 plasmid pSotonE4, complete sequence	NC_020987.1	1071760
RefSeq	Chlamydia trachomatis E/SotonE8 high quality draft genome	NC_020942.1	1071761
RefSeq	Chlamydia trachomatis E/SotonE8 plasmid pSotonE8, complete sequence	NC_020960.1	1071761
RefSeq	Chlamydia trachomatis plasmid pSW4, complete sequence	NC_012625.1	813
RefSeq	Chlamydia trachomatis F/SW4, complete genome	NC_017951.1	1071762
RefSeq	Chlamydia trachomatis plasmid pSW5, complete sequence	NC_012626.1	813
RefSeq	Chlamydia trachomatis F/SW5, complete genome	NC_017953.1	1071763
RefSeq	Chlamydia trachomatis F/SWFPminus high quality draft genome sequence	NC_022548.1	1100833
RefSeq	Chlamydia trachomatis G/11074 chromosome, complete genome	NC_017440.1	707187
RefSeq	Chlamydia trachomatis G/11222 chromosome, complete genome	NC_017430.1	707186
RefSeq	Chlamydia trachomatis G/9301 chromosome, complete genome	NC_017432.1	718219
RefSeq	Chlamydia trachomatis G/9768 chromosome, complete genome	NC_017429.1	707185
RefSeq	Chlamydia trachomatis G/SotonG1 complete genome	NC_020941.1	1071765
RefSeq	Chlamydia trachomatis G/SotonG1 plasmid pSotonG1, complete sequence	NC_020961.1	1071765
RefSeq	Chlamydia trachomatis IU824 complete genome	NC_020511.1	1260222
RefSeq	Chlamydia trachomatis IU824 plasmid pIU824, complete sequence	NC_020551.1	1260222
RefSeq	Chlamydia trachomatis IU888 complete genome	NC_020512.1	1260223
RefSeq	Chlamydia trachomatis IU888 plasmid pIU888, complete sequence	NC_020513.1	1260223
RefSeq	Chlamydia trachomatis Ia/SotonIa1 plasmid pSotonIa1, complete sequence	NC_020962.1	1071766
RefSeq	Chlamydia trachomatis Ia/SotonIa1 complete genome	NC_020970.1	1071766
RefSeq	Chlamydia trachomatis J/6276tet1, complete genome	NC_021892.1	907272
RefSeq	Chlamydia trachomatis K/SotonK1 plasmid pSotonK1, complete sequence	NC_020963.1	1071768
RefSeq	Chlamydia trachomatis K/SotonK1 complete genome	NC_020965.1	1071768
RefSeq	Chlamydia trachomatis L1/115 complete genome	NC_020929.1	1071770
RefSeq	Chlamydia trachomatis L1/115 plasmid pL1115, complete sequence	NC_020951.1	1071770
RefSeq	Chlamydia trachomatis L1/224 plasmid pL1224, complete sequence	NC_020952.1	1071771
RefSeq	Chlamydia trachomatis L1/224 complete genome	NC_020973.1	1071771
RefSeq	Chlamydia trachomatis L1/440/LN complete genome	NC_020937.1	1071769
RefSeq	Chlamydia trachomatis L2/25667R complete genome	NC_020930.1	1071772
RefSeq	Chlamydia trachomatis L2/434/Bu(f) plasmid pL2/434/Bu(f), complete sequence	NC_021049.1	1262673
RefSeq	Chlamydia trachomatis L2/434/Bu(f), complete genome	NC_021052.1	1262673
RefSeq	Chlamydia trachomatis L2/434/Bu(i), complete genome	NC_021050.1	1263406
RefSeq	Chlamydia trachomatis L2/434/Bu(i) plasmid pL2/434/Bu(i), complete sequence	NC_021051.1	1263406
RefSeq	Chlamydia trachomatis L2b/795 complete genome	NC_020938.1	1071777
RefSeq	Chlamydia trachomatis L2b/795 plasmid pL2b795, complete sequence	NC_020983.1	1071777
RefSeq	Chlamydia trachomatis L2b/8200/07 complete genome	NC_020945.1	1071773
RefSeq	Chlamydia trachomatis L2b/820007 plasmid pL2b820007 complete sequence	NC_020984.1	1071773
RefSeq	Chlamydia trachomatis L2b/Ams1 complete genome	NC_020933.1	1071778
RefSeq	Chlamydia trachomatis L2b/Ams1 plasmid pAms1, complete sequence	NC_020980.1	1071778
RefSeq	Chlamydia trachomatis L2b/Ams2 high quality draft genome sequence	NC_020934.1	1071779
RefSeq	Chlamydia trachomatis L2b/Ams2 plasmid pAms2, complete sequence	NC_020948.1	1071779
RefSeq	Chlamydia trachomatis L2b/Ams3 plasmid pAms3, complete sequence	NC_020949.1	1071780
RefSeq	Chlamydia trachomatis L2b/Ams3 high quality draft genome sequence	NC_020977.1	1071780
RefSeq	Chlamydia trachomatis L2b/Ams4 high quality draft genome sequence	NC_020978.1	1071781
RefSeq	Chlamydia trachomatis L2b/Ams4 plasmid pAms4, complete sequence	NC_020981.1	1071781
RefSeq	Chlamydia trachomatis L2b/Ams5 high quality draft genome sequence	NC_020936.1	1071782
RefSeq	Chlamydia trachomatis L2b/Ams5 plasmid pAms5, complete sequence	NC_020950.1	1071782
RefSeq	Chlamydia trachomatis L2b/CV204 plasmid pL2bCV204, complete sequence	NC_020955.1	1071776
RefSeq	Chlamydia trachomatis L2b/CV204 high quality draft genome sequence	NC_020976.1	1071776
RefSeq	Chlamydia trachomatis L2b/Canada1 high quality draft genome sequence	NC_020935.1	1075085
RefSeq	Chlamydia trachomatis L2b/Canada1 plasmid pL2bCan1, complete sequence	NC_020953.1	1075085
RefSeq	Chlamydia trachomatis L2b/LST high quality draft genome sequence	NC_020975.1	1071775
RefSeq	Chlamydia trachomatis L2b/LST plasmid pL2bLST, complete sequence	NC_020985.1	1071775
RefSeq	Chlamydia trachomatis L2b/UCH-1/proctitis chromosome, complete genome	NC_010280.2	471473
RefSeq	Chlamydia trachomatis L2b/UCH-2 complete genome	NC_020931.1	1071774
RefSeq	Chlamydia trachomatis L2b/UCH-2 plasmid pL2bUCH2, complete sequence	NC_020956.1	1071774
RefSeq	Chlamydia trachomatis L2c chromosome, complete genome	NC_015744.1	887712
RefSeq	Chlamydia trachomatis L3/404/LN plasmid pL3404, complete sequence	NC_020957.1	1071783
RefSeq	Chlamydia trachomatis L3/404/LN complete genome	NC_020974.1	1071783
RefSeq	Chlamydia trachomatis RC-F/69, complete genome	NC_021895.1	907263
RefSeq	Chlamydia trachomatis RC-F(s)/342, complete genome	NC_021890.1	907269
RefSeq	Chlamydia trachomatis RC-F(s)/852, complete genome	NC_021888.1	907265
RefSeq	Chlamydia trachomatis RC-J/943, complete genome	NC_021896.1	907266
RefSeq	Chlamydia trachomatis RC-J/953, complete genome	NC_021889.1	907267
RefSeq	Chlamydia trachomatis RC-J/966, complete genome	NC_021898.1	907271
RefSeq	Chlamydia trachomatis RC-J/971, complete genome	NC_021899.1	1007871
RefSeq	Chlamydia trachomatis RC-J(s)/122, complete genome	NC_021891.1	907270
RefSeq	Chlamydia trachomatis RC-L2/55, complete genome	NC_021893.1	1007870
RefSeq	Chlamydia trachomatis RC-L2(s)/3, complete genome	NC_021897.1	907268
RefSeq	Chlamydia trachomatis RC-L2(s)/46, complete genome	NC_021887.1	907264
RefSeq	Chlamydia trachomatis Sweden2, complete genome	NC_017441.1	634464
RefSeq	Chlamydia trachomatis F/SotonF3 high quality draft genome sequence	NC_020964.1	1071764
RefSeq	Chlamydia trachomatis F/SotonF3 plasmid pSotonF3, complete sequence	NC_020988.1	1071764
RefSeq	Chlamydia trachomatis Ia/SotonIa3 complete genome	NC_020940.1	1071767
RefSeq	Chlamydia trachomatis Ia/SotonIa3 plasmid pSotonIa3, complete sequence	NC_020989.1	1071767
RefSeq	Chlamydia trachomatis L1/1322/p2 plasmid pL11322, complete sequence	NC_020982.1	1075087
RefSeq	Chlamydophila abortus S26/3, complete genome	NC_004552.2	218497
RefSeq	Chlamydophila caviae GPIC chromosome, complete genome	NC_003361.3	227941
RefSeq	Chlamydophila caviae GPIC plasmid pCpGP1, complete sequence	NC_004720.1	227941
RefSeq	Chlamydophila felis Fe/C-56, complete genome	NC_007899.1	264202
RefSeq	Chlamydophila felis Fe/C-56 plasmid pCfe1, complete sequence	NC_007900.1	264202
RefSeq	Chlamydophila pecorum E58 chromosome, complete genome	NC_015408.1	331635
RefSeq	Chlamydia phage phiCPAR39, complete sequence	NC_002180.1	117575
RefSeq	Chlamydophila pneumoniae CWL029 chromosome, complete genome	NC_000922.1	115713
RefSeq	Chlamydophila pneumoniae J138 chromosome, complete genome	NC_002491.1	138677
RefSeq	Chlamydophila pneumoniae LPCoLN chromosome, complete genome	NC_017285.1	406984
RefSeq	Chlamydophila pneumoniae LPCoLN plasmid unnamed, complete sequence	NC_017286.1	406984
RefSeq	Chlamydophila pneumoniae TW-183, complete genome	NC_005043.1	182082
RefSeq	Chlamydophila psittaci 01DC11 chromosome, complete genome	NC_017289.1	1112252
RefSeq	Chlamydophila psittaci 02DC15 chromosome, complete genome	NC_017292.1	1112254
RefSeq	Chlamydophila psittaci 08DC60 chromosome, complete genome	NC_017290.1	1112267
RefSeq	Chlamydophila psittaci 6BC chromosome, complete genome	NC_017287.1	331636
RefSeq	Chlamydophila psittaci 6BC plasmid pCps6BC, complete sequence	NC_017288.1	331636
RefSeq	Chlamydophila psittaci 6BC plasmid p6BC, complete sequence	NC_015217.1	331636
RefSeq	Chlamydophila psittaci 6BC chromosome, complete genome	NC_015470.1	331636
RefSeq	Chlamydophila psittaci C19/98 chromosome, complete genome	NC_017291.1	1112250
RefSeq	Chlorobaculum parvum NCIB 8327 chromosome, complete genome	NC_011027.1	517417
RefSeq	Chlorobium chlorochromatii CaD3 chromosome, complete genome	NC_007514.1	340177
RefSeq	Chlorobium limicola DSM 245 chromosome, complete genome	NC_010803.1	290315
RefSeq	Chlorobium luteolum DSM 273 chromosome, complete genome	NC_007512.1	319225
RefSeq	Chlorobium phaeobacteroides BS1 chromosome, complete genome	NC_010831.1	331678
RefSeq	Chlorobium phaeobacteroides DSM 266 chromosome, complete genome	NC_008639.1	290317
RefSeq	Chlorobium phaeovibrioides DSM 265 chromosome, complete genome	NC_009337.1	290318
RefSeq	Chlorobium tepidum TLS chromosome, complete genome	NC_002932.3	194439
RefSeq	Chloroflexus sp. Y-400-fl chromosome, complete genome	NC_012032.1	480224
RefSeq	Chloroflexus aggregans DSM 9485 chromosome, complete genome	NC_011831.1	326427
RefSeq	Chloroflexus aurantiacus J-10-fl chromosome, complete genome	NC_010175.1	324602
RefSeq	Chloroherpeton thalassium ATCC 35110 chromosome, complete genome	NC_011026.1	517418
RefSeq	Chromobacterium violaceum ATCC 12472 chromosome, complete genome	NC_005085.1	243365
RefSeq	Chromohalobacter salexigens DSM 3043 chromosome, complete genome	NC_007963.1	290398
RefSeq	Chroococcidiopsis thermalis PCC 7203 chromosome, complete genome	NC_019695.1	251229
RefSeq	Chroococcidiopsis thermalis PCC 7203 plasmid pCHRO.02, complete sequence	NC_019696.1	251229
RefSeq	Chroococcidiopsis thermalis PCC 7203 plasmid pCHRO.01, complete sequence	NC_019699.1	251229
RefSeq	Chthonomonas calidirosea T49 complete genome	NC_021487.1	1303518
RefSeq	Citrobacter koseri ATCC BAA-895 chromosome, complete genome	NC_009792.1	290338
RefSeq	Citrobacter koseri ATCC BAA-895 plasmid pCKO3, complete sequence	NC_009793.1	290338
RefSeq	Citrobacter koseri ATCC BAA-895 plasmid pCKO2, complete sequence	NC_009794.1	290338
RefSeq	Citrobacter rodentium ICC168 chromosome, complete genome	NC_013716.1	637910
RefSeq	Citrobacter rodentium ICC168 plasmid pCROD1, complete sequence	NC_013717.1	637910
RefSeq	Citrobacter rodentium ICC168 plasmid pCROD2, complete sequence	NC_013718.1	637910
RefSeq	Citrobacter rodentium ICC168 plasmid pCROD3, complete sequence	NC_013719.1	637910
RefSeq	Clavibacter michiganensis subsp. michiganensis NCPPB 382 plasmid pCM1, complete sequence	NC_009478.1	443906
RefSeq	Clavibacter michiganensis subsp. michiganensis NCPPB 382 plasmid pCM2, complete sequence	NC_009479.1	443906
RefSeq	Clavibacter michiganensis subsp. michiganensis NCPPB 382 chromosome, complete genome	NC_009480.1	443906
RefSeq	Clavibacter michiganensis subsp. nebraskensis NCPPB 2581 complete genome	NC_020891.1	1097677
RefSeq	Clavibacter michiganensis subsp. sepedonicus plasmid pCS1, complete sequence	NC_010399.1	31964
RefSeq	Clavibacter michiganensis subsp. sepedonicus chromosome, complete genome	NC_010407.1	31964
RefSeq	Clavibacter michiganensis subsp. sepedonicus plasmid pCSL1, complete sequence	NC_010408.1	31964
RefSeq	Clostridiales genomosp. BVAB3 str. UPII9-5 chromosome, complete genome	NC_013895.2	699246
RefSeq	Clostridium sp. BNL1100 chromosome, complete genome	NC_016791.1	755731
RefSeq	Clostridium sp. SY8519, complete genome	NC_015737.1	1042156
RefSeq	Clostridium acetobutylicum ATCC 824 plasmid pSOL1, complete sequence	NC_001988.2	272562
RefSeq	Clostridium acetobutylicum ATCC 824 chromosome, complete genome	NC_003030.1	272562
RefSeq	Clostridium acetobutylicum DSM 1731 plasmid pSMBa, complete sequence	NC_015686.1	991791
RefSeq	Clostridium acetobutylicum DSM 1731 chromosome, complete genome	NC_015687.1	991791
RefSeq	Clostridium acetobutylicum DSM 1731 plasmid pSMBb, complete sequence	NC_015688.1	991791
RefSeq	Clostridium acetobutylicum EA 2018 chromosome, complete genome	NC_017295.1	863638
RefSeq	Clostridium acetobutylicum EA 2018 EA2018plasmid, complete sequence	NC_017296.1	863638
RefSeq	Clostridium acidurici 9a plasmid pCuri3, complete sequence	NC_018657.1	1128398
RefSeq	Clostridium acidurici 9a chromosome, complete genome	NC_018664.1	1128398
RefSeq	Clostridium autoethanogenum DSM 10061, complete genome	NC_022592.1	1341692
RefSeq	Clostridium beijerinckii NCIMB 8052 chromosome, complete genome	NC_009617.1	290402
RefSeq	Clostridium botulinum A2 str. Kyoto chromosome, complete genome	NC_012563.1	536232
RefSeq	Clostridium botulinum A3 str. Loch Maree plasmid pCLK, complete sequence	NC_010418.1	498214
RefSeq	Clostridium botulinum A3 str. Loch Maree chromosome, complete genome	NC_010520.1	498214
RefSeq	Clostridium botulinum A str. ATCC 19397 chromosome, complete genome	NC_009697.1	441770
RefSeq	Clostridium botulinum A str. ATCC 3502 chromosome, complete genome	NC_009495.1	413999
RefSeq	Clostridium botulinum A str. ATCC 3502 plasmid pBOT3502, complete sequence	NC_009496.1	413999
RefSeq	Clostridium botulinum A str. Hall chromosome, complete genome	NC_009698.1	441771
RefSeq	Clostridium botulinum B1 str. Okra plasmid pCLD, complete sequence	NC_010379.1	498213
RefSeq	Clostridium botulinum B1 str. Okra chromosome, complete genome	NC_010516.1	498213
RefSeq	Clostridium botulinum BKT015925 plasmid p1BKT015925, complete sequence	NC_015417.1	929506
RefSeq	Clostridium botulinum BKT015925 plasmid p3BKT015925, complete sequence	NC_015418.1	929506
RefSeq	Clostridium botulinum BKT015925 plasmid p5BKT015925, complete sequence	NC_015419.1	929506
RefSeq	Clostridium botulinum BKT015925 chromosome, complete genome	NC_015425.1	929506
RefSeq	Clostridium botulinum BKT015925 plasmid p2BKT015925, complete sequence	NC_015426.1	929506
RefSeq	Clostridium botulinum BKT015925 plasmid p4BKT015925, complete sequence	NC_015427.1	929506
RefSeq	Clostridium botulinum B str. Eklund 17B chromosome, complete genome	NC_010674.1	935198
RefSeq	Clostridium botulinum B str. Eklund 17B plasmid pCLL, complete sequence	NC_010680.1	935198
RefSeq	Clostridium botulinum Ba4 str. 657 plasmid pCLJ, complete sequence	NC_012654.1	515621
RefSeq	Clostridium botulinum Ba4 str. 657 plasmid pCLJ2, complete sequence	NC_012657.1	515621
RefSeq	Clostridium botulinum Ba4 str. 657 chromosome, complete genome	NC_012658.1	515621
RefSeq	Clostridium botulinum E3 str. Alaska E43 chromosome, complete genome	NC_010723.1	508767
RefSeq	Clostridium botulinum F str. 230613 chromosome, complete genome	NC_017297.1	758678
RefSeq	Clostridium botulinum F str. 230613 plasmid pCBF, complete sequence	NC_017298.1	758678
RefSeq	Clostridium botulinum F str. Langeland chromosome, complete genome	NC_009699.1	441772
RefSeq	Clostridium botulinum F str. Langeland plasmid pCLI, complete sequence	NC_009700.1	441772
RefSeq	Clostridium botulinum H04402 065, complete genome	NC_017299.1	941968
RefSeq	Clostridium cellulolyticum H10 chromosome, complete genome	NC_011898.1	394503
RefSeq	Clostridium cellulovorans 743B chromosome, complete genome	NC_014393.1	573061
RefSeq	Clostridium clariflavum DSM 19732 chromosome, complete genome	NC_016627.1	720554
RefSeq	Peptoclostridium difficile 630 plasmid pCD630, complete sequence	NC_008226.1	272563
RefSeq	Peptoclostridium difficile 630, complete genome	NC_009089.1	272563
RefSeq	Clostridium difficile CD196 chromosome, complete genome	NC_013315.1	645462
RefSeq	Clostridium difficile M120, complete genome	NC_017174.1	699035
RefSeq	Clostridium difficile M68, complete genome	NC_017175.1	699037
RefSeq	Clostridium kluyveri DSM 555 plasmid pCKL555A, complete sequence	NC_009466.1	431943
RefSeq	Clostridium kluyveri DSM 555 chromosome, complete genome	NC_009706.1	431943
RefSeq	Clostridium kluyveri NBRC 12016 plasmid pCKL1, complete sequence	NC_011836.1	583346
RefSeq	Clostridium kluyveri NBRC 12016, complete genome	NC_011837.1	583346
RefSeq	Clostridium lentocellum DSM 5427 chromosome, complete genome	NC_015275.1	642492
RefSeq	Clostridium ljungdahlii DSM 13528 chromosome, complete genome	NC_014328.1	748727
RefSeq	Clostridium novyi NT chromosome, complete genome	NC_008593.1	386415
RefSeq	Clostridium pasteurianum BC1, complete genome	NC_021182.1	86416
RefSeq	Clostridium pasteurianum BC1 plasmid pCLOPA01, complete sequence	NC_021183.1	86416
RefSeq	Clostridium perfringens str. 13 plasmid pCP13, complete sequence	NC_003042.1	195102
RefSeq	Clostridium perfringens str. 13 chromosome, complete genome	NC_003366.1	195102
RefSeq	Clostridium perfringens ATCC 13124 chromosome, complete genome	NC_008261.1	195103
RefSeq	Clostridium phage phiSM101, complete genome	NC_008265.1	396359
RefSeq	Clostridium phytofermentans ISDg chromosome, complete genome	NC_010001.1	357809
RefSeq	Clostridium saccharobutylicum DSM 13864, complete genome	NC_022571.1	1345695
RefSeq	Clostridium saccharolyticum WM1 chromosome, complete genome	NC_014376.1	610130
RefSeq	Clostridium saccharoperbutylacetonicum N1-4(HMT), complete genome	NC_020291.1	931276
RefSeq	Clostridium saccharoperbutylacetonicum N1-4(HMT) plasmid Csp_135p, complete sequence	NC_020292.1	931276
RefSeq	Clostridium stercorarium subsp. stercorarium DSM 8532, complete genome	NC_020134.1	1121335
RefSeq	Clostridium stercorarium subsp. stercorarium DSM 8532, complete genome	NC_020887.2	1121335
RefSeq	Clostridium tetani 12124569 main chromosome, complete genome	NC_022777.1	1231072
RefSeq	Clostridium tetani 12124569, plasmid p12124569, complete sequence	NC_022778.1	1231072
RefSeq	Clostridium tetani E88 chromosome, complete genome	NC_004557.1	212717
RefSeq	Clostridium tetani E88 plasmid pE88, complete sequence	NC_004565.1	212717
RefSeq	Clostridium thermocellum ATCC 27405 chromosome, complete genome	NC_009012.1	203119
RefSeq	Clostridium thermocellum DSM 1313 chromosome, complete genome	NC_017304.1	637887
RefSeq	Collimonas fungivorans Ter331 chromosome, complete genome	NC_015856.1	1005048
RefSeq	Colwellia psychrerythraea 34H chromosome, complete genome	NC_003910.7	167879
RefSeq	Comamonadaceae bacterium CR, complete genome	NC_022576.1	946483
RefSeq	Comamonas testosteroni CNB-1 plasmid pCNB, complete sequence	NC_010935.1	543891
RefSeq	Comamonas testosteroni CNB-2, complete genome	NC_013446.2	688245
RefSeq	Conexibacter woesei DSM 14684 chromosome, complete genome	NC_013739.1	469383
RefSeq	Coprothermobacter proteolyticus DSM 5265 chromosome, complete genome	NC_011295.1	309798
RefSeq	Coraliomargarita akajimensis DSM 45221 chromosome, complete genome	NC_014008.1	583355
RefSeq	Corallococcus coralloides DSM 2259 chromosome, complete genome	NC_017030.1	1144275
RefSeq	Coriobacterium glomerans PW2 chromosome, complete genome	NC_015389.1	700015
RefSeq	Corynebacterium argentoratense DSM 44202, complete genome	NC_022198.1	1348662
RefSeq	Corynebacterium aurimucosum ATCC 700975 plasmid pET44827, complete sequence	NC_010813.1	548476
RefSeq	Corynebacterium aurimucosum ATCC 700975 chromosome, complete genome	NC_012590.1	548476
RefSeq	Corynebacterium callunae DSM 20147, complete genome	NC_020506.1	1121353
RefSeq	Corynebacterium callunae DSM 20147 plasmid pCC1, complete sequence	NC_020523.1	1121353
RefSeq	Corynebacterium callunae DSM 20147 plasmid pCC2, complete sequence	NC_020553.1	1121353
RefSeq	Corynebacterium diphtheriae 241 chromosome, complete genome	NC_016782.1	698966
RefSeq	Corynebacterium diphtheriae 31A chromosome, complete genome	NC_016799.1	698962
RefSeq	Corynebacterium diphtheriae BH8 chromosome, complete genome	NC_016800.1	698973
RefSeq	Corynebacterium diphtheriae C7 (beta) chromosome, complete genome	NC_016801.1	698963
RefSeq	Corynebacterium diphtheriae CDCE 8392 chromosome, complete genome	NC_016785.1	698965
RefSeq	Corynebacterium diphtheriae HC01 chromosome, complete genome	NC_016786.1	698967
RefSeq	Corynebacterium diphtheriae HC02 chromosome, complete genome	NC_016802.1	698968
RefSeq	Corynebacterium diphtheriae HC03 chromosome, complete genome	NC_016787.1	698969
RefSeq	Corynebacterium diphtheriae HC04 chromosome, complete genome	NC_016788.1	698970
RefSeq	Corynebacterium diphtheriae INCA 402 chromosome, complete genome	NC_016783.1	698972
RefSeq	Corynebacterium diphtheriae NCTC 13129 chromosome, complete genome	NC_002935.2	257309
RefSeq	Corynebacterium diphtheriae PW8 chromosome, complete genome	NC_016789.1	698964
RefSeq	Corynebacterium diphtheriae VA01 chromosome, complete genome	NC_016790.1	698971
RefSeq	Corynebacterium efficiens YS-314 plasmid pCE2, complete sequence	NC_004319.1	196164
RefSeq	Corynebacterium efficiens YS-314 plasmid pCE3, complete sequence	NC_004320.1	196164
RefSeq	Corynebacterium efficiens YS-314 chromosome, complete genome	NC_004369.1	196164
RefSeq	Corynebacterium glutamicum K051 complete genome, strain ATCC 13032, sub-strain K051	NC_020519.1	1204414
RefSeq	Corynebacterium glutamicum ATCC 13032 chromosome, complete genome	NC_003450.3	196627
RefSeq	Corynebacterium glutamicum ATCC 13032, complete genome	NC_006958.1	196627
RefSeq	Corynebacterium glutamicum MB001, complete genome	NC_022040.1	1310161
RefSeq	Corynebacterium glutamicum R chromosome, complete genome	NC_009342.1	340322
RefSeq	Corynebacterium glutamicum R plasmid pCGR1, complete sequence	NC_009343.1	340322
RefSeq	Corynebacterium glutamicum SCgG1, complete genome	NC_021351.1	1232381
RefSeq	Corynebacterium glutamicum SCgG2, complete genome	NC_021352.1	1232383
RefSeq	Corynebacterium halotolerans YIM 70093 = DSM 44683 chromosome, complete genome	NC_020302.1	1121362
RefSeq	Corynebacterium halotolerans YIM 70093 = DSM 44683 plasmid pCha1, complete sequence	NC_020303.1	1121362
RefSeq	Corynebacterium jeikeium K411 plasmid pKW4, complete sequence	NC_003080.1	306537
RefSeq	Corynebacterium jeikeium K411 chromosome, complete genome	NC_007164.1	306537
RefSeq	Corynebacterium kroppenstedtii DSM 44385 chromosome, complete genome	NC_012704.1	645127
RefSeq	Corynebacterium maris DSM 45190, complete genome	NC_021915.1	1224163
RefSeq	Corynebacterium maris DSM 45190 plasmid pCmaris1, complete sequence	NC_021920.1	1224163
RefSeq	Corynebacterium pseudotuberculosis 1002 chromosome, complete genome	NC_017300.1	679896
RefSeq	Corynebacterium pseudotuberculosis 1/06-A chromosome, complete genome	NC_017308.1	1087454
RefSeq	Corynebacterium pseudotuberculosis 267 chromosome, complete genome	NC_017462.1	1089446
RefSeq	Corynebacterium pseudotuberculosis 316 chromosome, complete genome	NC_016932.1	1074485
RefSeq	Corynebacterium pseudotuberculosis 3/99-5 chromosome, complete genome	NC_016781.1	1087452
RefSeq	Corynebacterium pseudotuberculosis 42/02-A chromosome, complete genome	NC_017306.1	1087453
RefSeq	Corynebacterium pseudotuberculosis C231 chromosome, complete genome	NC_017301.1	681645
RefSeq	Corynebacterium pseudotuberculosis CIP 52.97 chromosome, complete genome	NC_017307.1	935697
RefSeq	Corynebacterium pseudotuberculosis Cp162 chromosome, complete genome	NC_018019.1	1161911
RefSeq	Corynebacterium pseudotuberculosis FRC41 chromosome, complete genome	NC_014329.1	765874
RefSeq	Corynebacterium pseudotuberculosis I19 chromosome, complete genome	NC_017303.1	889513
RefSeq	Corynebacterium pseudotuberculosis P54B96 chromosome, complete genome	NC_017031.1	1117942
RefSeq	Corynebacterium pseudotuberculosis PAT10 chromosome, complete genome	NC_017305.1	935298
RefSeq	Corynebacterium resistens DSM 45100 chromosome, complete genome	NC_015673.1	662755
RefSeq	Corynebacterium terpenotabidum Y-11, complete genome	NC_021663.1	1200352
RefSeq	Corynebacterium ulcerans 0102, complete genome	NC_018101.1	996634
RefSeq	Corynebacterium ulcerans 809 chromosome, complete genome	NC_017317.1	945711
RefSeq	Corynebacterium ulcerans BR-AD22 chromosome, complete genome	NC_015683.1	945712
RefSeq	Corynebacterium urealyticum DSM 7109 chromosome, complete genome	NC_010545.1	504474
RefSeq	Corynebacterium urealyticum DSM 7111, complete genome	NC_020230.1	1267754
RefSeq	Corynebacterium variabile DSM 44702 chromosome, complete genome	NC_015859.1	858619
RefSeq	Coxiella burnetii CbuG_Q212 chromosome, complete genome	NC_011527.1	434923
RefSeq	Coxiella burnetii CbuK_Q154 plasmid pQpRS_K_Q154, complete sequence	NC_011526.1	434924
RefSeq	Coxiella burnetii CbuK_Q154 chromosome, complete genome	NC_011528.1	434924
RefSeq	Coxiella burnetii Dugway 5J108-111 plasmid pQpDG, complete sequence	NC_009726.1	434922
RefSeq	Coxiella burnetii Dugway 5J108-111 chromosome, complete genome	NC_009727.1	434922
RefSeq	Coxiella burnetii RSA 331 plasmid QpH1, complete sequence	NC_010115.1	360115
RefSeq	Coxiella burnetii RSA 331 chromosome, complete genome	NC_010117.1	360115
RefSeq	Coxiella burnetii RSA 493 chromosome, complete genome	NC_002971.3	227377
RefSeq	Coxiella burnetii RSA 493 plasmid pQpH1, complete sequence	NC_004704.1	227377
RefSeq	Crinalium epipsammum PCC 9333 plasmid pCRI9333.01, complete sequence	NC_019733.1	1173022
RefSeq	Crinalium epipsammum PCC 9333 plasmid pCRI9333.02, complete sequence	NC_019734.1	1173022
RefSeq	Crinalium epipsammum PCC 9333 plasmid pCRI9333.04, complete sequence	NC_019735.1	1173022
RefSeq	Crinalium epipsammum PCC 9333 plasmid pCRI9333.05, complete sequence	NC_019736.1	1173022
RefSeq	Crinalium epipsammum PCC 9333 plasmid pCRI9333.07, complete sequence	NC_019737.1	1173022
RefSeq	Crinalium epipsammum PCC 9333 chromosome, complete genome	NC_019753.1	1173022
RefSeq	Crinalium epipsammum PCC 9333 plasmid pCRI9333.03, complete sequence	NC_019754.1	1173022
RefSeq	Crinalium epipsammum PCC 9333 plasmid pCRI9333.06, complete sequence	NC_019755.1	1173022
RefSeq	Crinalium epipsammum PCC 9333 plasmid pCRI9333.08, complete sequence	NC_019756.1	1173022
RefSeq	Croceibacter atlanticus HTCC2559 chromosome, complete genome	NC_014230.1	216432
RefSeq	Cronobacter sakazakii CMCC 45402 plasmid p1, complete sequence	NC_023024.1	1401659
RefSeq	Cronobacter sakazakii CMCC 45402 plasmid p2, complete sequence	NC_023025.1	1401659
RefSeq	Cronobacter sakazakii CMCC 45402, complete genome	NC_023032.1	1401659
RefSeq	Cronobacter sakazakii ATCC BAA-894 chromosome, complete genome	NC_009778.1	290339
RefSeq	Cronobacter sakazakii ATCC BAA-894 plasmid pESA2, complete sequence	NC_009779.1	290339
RefSeq	Cronobacter sakazakii ATCC BAA-894 plasmid pESA3, complete sequence	NC_009780.1	290339
RefSeq	Cronobacter sakazakii ES15 chromosome, complete genome	NC_017933.1	1138308
RefSeq	Cronobacter sakazakii Sp291, complete genome	NC_020260.1	956149
RefSeq	Cronobacter sakazakii Sp291 plasmid pSP291-2, complete sequence	NC_020261.1	956149
RefSeq	Cronobacter sakazakii Sp291 plasmid pSP291-3, complete sequence	NC_020262.1	956149
RefSeq	Cronobacter sakazakii Sp291 plasmid pSP291-1, complete sequence	NC_020263.1	956149
RefSeq	Cronobacter turicensis z3032 chromosome, complete genome	NC_013282.2	693216
RefSeq	Cronobacter turicensis z3032 plasmid pCTU1, complete sequence	NC_013283.1	693216
RefSeq	Cronobacter turicensis z3032 plasmid pCTU2, complete sequence	NC_013284.1	693216
RefSeq	Cronobacter turicensis z3032 plasmid pCTU3, complete sequence	NC_013285.1	693216
RefSeq	Cryptobacterium curtum DSM 15641 chromosome, complete genome	NC_013170.1	469378
RefSeq	Cupriavidus metallidurans CH34 plasmid pMOL30, complete sequence	NC_007971.2	266264
RefSeq	Cupriavidus metallidurans CH34 plasmid pMOL28, complete sequence	NC_007972.2	266264
RefSeq	Cupriavidus metallidurans CH34 chromosome, complete genome	NC_007973.1	266264
RefSeq	Cupriavidus metallidurans CH34 megaplasmid, complete sequence	NC_007974.2	266264
RefSeq	Cupriavidus necator N-1 chromosome 2, complete sequence	NC_015723.1	1042878
RefSeq	Cupriavidus necator N-1 plasmid BB2p, complete sequence	NC_015724.1	1042878
RefSeq	Cupriavidus necator N-1 chromosome 1, complete sequence	NC_015726.1	1042878
RefSeq	Cupriavidus necator N-1 plasmid BB1p, complete sequence	NC_015727.1	1042878
RefSeq	Cupriavidus taiwanensis LMG 19424 chromosome 1, complete sequence	NC_010528.1	977880
RefSeq	Cupriavidus taiwanensis LMG 19424 plasmid pRALTA, complete sequence	NC_010529.1	977880
RefSeq	Cupriavidus taiwanensis LMG 19424 chromosome 2, complete sequence	NC_010530.1	977880
RefSeq	Cyanobacterium aponinum PCC 10605 chromosome, complete genome	NC_019776.1	755178
RefSeq	Cyanobacterium aponinum PCC 10605 plasmid pCYAN10605.01, complete sequence	NC_019777.1	755178
RefSeq	Cyanobium gracile PCC 6307 chromosome, complete genome	NC_019675.1	292564
RefSeq	Cyanothece sp. ATCC 51142 plasmid A, complete sequence	NC_010539.1	43989
RefSeq	Cyanothece sp. ATCC 51142 plasmid B, complete sequence	NC_010541.1	43989
RefSeq	Cyanothece sp. ATCC 51142 plasmid C, complete sequence	NC_010542.1	43989
RefSeq	Cyanothece sp. ATCC 51142 plasmid D, complete sequence	NC_010543.1	43989
RefSeq	Cyanothece sp. ATCC 51142 chromosome circular, complete sequence	NC_010546.1	43989
RefSeq	Cyanothece sp. ATCC 51142 chromosome linear, complete sequence	NC_010547.1	43989
RefSeq	Cyanothece sp. PCC 7424 chromosome, complete genome	NC_011729.1	65393
RefSeq	Cyanothece sp. PCC 7424 plasmid pP742403, complete sequence	NC_011730.1	65393
RefSeq	Cyanothece sp. PCC 7424 plasmid pP742404, complete sequence	NC_011732.1	65393
RefSeq	Cyanothece sp. PCC 7424 plasmid pP742405, complete sequence	NC_011733.1	65393
RefSeq	Cyanothece sp. PCC 7424 plasmid pP742406, complete sequence	NC_011734.1	65393
RefSeq	Cyanothece sp. PCC 7424 plasmid pP742402, complete sequence	NC_011737.1	65393
RefSeq	Cyanothece sp. PCC 7424 plasmid pP742401, complete sequence	NC_011738.1	65393
RefSeq	Cyanothece sp. PCC 7425 plasmid pP742501, complete sequence	NC_011880.1	395961
RefSeq	Cyanothece sp. PCC 7425 plasmid pP742503, complete sequence	NC_011882.1	395961
RefSeq	Cyanothece sp. PCC 7425 chromosome, complete genome	NC_011884.1	395961
RefSeq	Cyanothece sp. PCC 7425 plasmid pP742502, complete sequence	NC_011885.1	395961
RefSeq	Cyanothece sp. PCC 7822 chromosome, complete genome	NC_014501.1	497965
RefSeq	Cyanothece sp. PCC 7822 plasmid Cy782203, complete sequence	NC_014502.1	497965
RefSeq	Cyanothece sp. PCC 7822 plasmid Cy782204, complete sequence	NC_014503.1	497965
RefSeq	Cyanothece sp. PCC 7822 plasmid Cy782205, complete sequence	NC_014504.1	497965
RefSeq	Cyanothece sp. PCC 7822 plasmid Cy782201, complete sequence	NC_014533.1	497965
RefSeq	Cyanothece sp. PCC 7822 plasmid Cy782202, complete sequence	NC_014534.1	497965
RefSeq	Cyanothece sp. PCC 7822 plasmid Cy782206, complete sequence	NC_014535.1	497965
RefSeq	Cyanothece sp. PCC 8801 plasmid pP880101, complete sequence	NC_011721.1	41431
RefSeq	Cyanothece sp. PCC 8801 plasmid pP880102, complete sequence	NC_011723.1	41431
RefSeq	Cyanothece sp. PCC 8801 chromosome, complete genome	NC_011726.1	41431
RefSeq	Cyanothece sp. PCC 8801 plasmid pP880103, complete sequence	NC_011727.1	41431
RefSeq	Cyanothece sp. PCC 8802 plasmid pP880201, complete sequence	NC_013160.1	395962
RefSeq	Cyanothece sp. PCC 8802 chromosome, complete genome	NC_013161.1	395962
RefSeq	Cyanothece sp. PCC 8802 plasmid pP880202, complete sequence	NC_013163.1	395962
RefSeq	Cyanothece sp. PCC 8802 plasmid pP880203, complete sequence	NC_013167.1	395962
RefSeq	Cyanothece sp. PCC 8802 plasmid pP880204, complete sequence	NC_013168.1	395962
RefSeq	Cyclobacterium marinum DSM 745 chromosome, complete genome	NC_015914.1	880070
RefSeq	Cycloclasticus sp. P1 chromosome, complete genome	NC_018697.1	385025
RefSeq	Cycloclasticus zancles 7-ME, complete genome	NC_021917.1	1198232
RefSeq	Cycloclasticus zancles 7-ME plasmid p7ME01, complete sequence	NC_021918.1	1198232
RefSeq	Cylindrospermum stagnale PCC 7417 plasmid pCYLST.02, complete sequence	NC_019744.1	56107
RefSeq	Cylindrospermum stagnale PCC 7417, complete genome	NC_019757.1	56107
RefSeq	Cylindrospermum stagnale PCC 7417 plasmid pCYLST.03, complete sequence	NC_019758.1	56107
RefSeq	Cylindrospermum stagnale PCC 7417 plasmid pCYLST.01, partial sequence	NC_020050.1	56107
RefSeq	Cytophaga hutchinsonii ATCC 33406 chromosome, complete genome	NC_008255.1	269798
RefSeq	Dactylococcopsis salina PCC 8305 chromosome, complete genome	NC_019780.1	13035
RefSeq	Dechloromonas aromatica RCB, complete genome	NC_007298.1	159087
RefSeq	Dechlorosoma suillum PS chromosome, complete genome	NC_016616.1	640081
RefSeq	Deferribacter desulfuricans SSM1, complete genome	NC_013939.1	639282
RefSeq	Deferribacter desulfuricans SSM1 megaplasmid pDF308, complete sequence	NC_013940.1	639282
RefSeq	Dehalobacter sp. DCA chromosome, complete genome	NC_018866.1	1147129
RefSeq	Dehalobacter sp. CF chromosome, complete genome	NC_018867.1	1131462
RefSeq	Dehalococcoides sp. BAV1 chromosome, complete genome	NC_009455.1	216389
RefSeq	Dehalococcoides sp. CBDB1 chromosome, complete genome	NC_007356.1	255470
RefSeq	Dehalococcoides sp. GT chromosome, complete genome	NC_013890.1	633145
RefSeq	Dehalococcoides sp. VS chromosome, complete genome	NC_013552.1	311424
RefSeq	Dehalococcoides ethenogenes 195, complete genome	NC_002936.3	243164
RefSeq	Dehalococcoides mccartyi BTF08, complete genome	NC_020387.1	1193806
RefSeq	Dehalococcoides mccartyi DCMB5, complete genome	NC_020386.1	1193807
RefSeq	Dehalococcoides mccartyi GY50, complete genome	NC_022964.1	1388758
RefSeq	Dehalogenimonas lykanthroporepellens BL-DC-9 chromosome, complete genome	NC_014314.1	552811
RefSeq	Deinococcus deserti VCD115 chromosome, complete genome	NC_012526.1	546414
RefSeq	Deinococcus deserti VCD115 plasmid 1, complete sequence	NC_012527.1	546414
RefSeq	Deinococcus deserti VCD115 plasmid 3, complete sequence	NC_012528.1	546414
RefSeq	Deinococcus deserti VCD115 plasmid 2, complete sequence	NC_012529.1	546414
RefSeq	Deinococcus geothermalis DSM 11300 plasmid pDGEO01, complete sequence	NC_008010.2	319795
RefSeq	Deinococcus geothermalis DSM 11300, complete genome	NC_008025.1	319795
RefSeq	Deinococcus geothermalis DSM 11300 plasmid pDGEO02, complete sequence	NC_009939.1	319795
RefSeq	Deinococcus gobiensis I-0 plasmid P3, complete sequence	NC_017771.1	745776
RefSeq	Deinococcus gobiensis I-0 chromosome, complete genome	NC_017790.1	745776
RefSeq	Deinococcus gobiensis I-0 plasmid P2, complete sequence	NC_017791.1	745776
RefSeq	Deinococcus gobiensis I-0 plasmid P4, complete sequence	NC_017792.1	745776
RefSeq	Deinococcus gobiensis I-0 plasmid P6, complete sequence	NC_017793.1	745776
RefSeq	Deinococcus gobiensis I-0 plasmid P1, complete sequence	NC_017805.1	745776
RefSeq	Deinococcus gobiensis I-0 plasmid P5, complete sequence	NC_017806.1	745776
RefSeq	Deinococcus maricopensis DSM 21211 chromosome, complete genome	NC_014958.1	709986
RefSeq	Deinococcus peraridilitoris DSM 19664 plasmid pDEIPE01, complete sequence	NC_019789.1	937777
RefSeq	Deinococcus peraridilitoris DSM 19664 plasmid pDEIPE02, complete sequence	NC_019790.1	937777
RefSeq	Deinococcus peraridilitoris DSM 19664 chromosome, complete genome	NC_019793.1	937777
RefSeq	Deinococcus proteolyticus MRP chromosome, complete genome	NC_015161.1	693977
RefSeq	Deinococcus proteolyticus MRP plasmid pDEIPR02, complete sequence	NC_015162.1	693977
RefSeq	Deinococcus proteolyticus MRP plasmid pDEIPR04, complete sequence	NC_015163.1	693977
RefSeq	Deinococcus proteolyticus MRP plasmid pDEIPR01, complete sequence	NC_015169.1	693977
RefSeq	Deinococcus proteolyticus MRP plasmid pDEIPR03, complete sequence	NC_015170.1	693977
RefSeq	Deinococcus radiodurans R1 plasmid MP1, complete sequence	NC_000958.1	243230
RefSeq	Deinococcus radiodurans R1 plasmid CP1, complete sequence	NC_000959.1	243230
RefSeq	Deinococcus radiodurans R1 chromosome 1, complete sequence	NC_001263.1	243230
RefSeq	Deinococcus radiodurans R1 chromosome 2, complete sequence	NC_001264.1	243230
RefSeq	Delftia sp. Cs1-4 chromosome, complete genome	NC_015563.1	742013
RefSeq	Delftia acidovorans SPH-1 chromosome, complete genome	NC_010002.1	398578
RefSeq	Denitrovibrio acetiphilus DSM 12809 chromosome, complete genome	NC_013943.1	522772
RefSeq	Desulfarculus baarsii DSM 2075 chromosome, complete genome	NC_014365.1	644282
RefSeq	Desulfatibacillum alkenivorans AK-01 chromosome, complete genome	NC_011768.1	439235
RefSeq	Desulfitobacterium dehalogenans ATCC 51507 chromosome, complete genome	NC_018017.1	756499
RefSeq	Desulfitobacterium dichloroeliminans LMG P-21439 chromosome, complete genome	NC_019903.1	871963
RefSeq	Desulfitobacterium hafniense DCB-2 chromosome, complete genome	NC_011830.1	272564
RefSeq	Desulfitobacterium hafniense Y51 chromosome, complete genome	NC_007907.1	138119
RefSeq	Desulfobacca acetoxidans DSM 11109 chromosome, complete genome	NC_015388.1	880072
RefSeq	Desulfobacterium autotrophicum HRM2 chromosome, complete genome	NC_012108.1	177437
RefSeq	Desulfobacterium autotrophicum HRM2 plasmid pHRM2a, complete sequence	NC_012109.1	177437
RefSeq	Desulfobacula toluolica Tol2, complete genome	NC_018645.1	651182
RefSeq	Desulfobulbus propionicus DSM 2032 chromosome, complete genome	NC_014972.1	577650
RefSeq	Desulfocapsa sulfexigens DSM 10523, complete genome	NC_020304.1	1167006
RefSeq	Desulfocapsa sulfexigens DSM 10523 plasmid, complete sequence	NC_020305.1	1167006
RefSeq	Desulfococcus oleovorans Hxd3 chromosome, complete genome	NC_009943.1	96561
RefSeq	Desulfohalobium retbaense DSM 5692 chromosome, complete genome	NC_013223.1	485915
RefSeq	Desulfohalobium retbaense DSM 5692 plasmid pDRET01, complete sequence	NC_013224.1	485915
RefSeq	Desulfomicrobium baculatum DSM 4028, complete genome	NC_013173.1	525897
RefSeq	Desulfomonile tiedjei DSM 6799 chromosome, complete genome	NC_018025.1	706587
RefSeq	Desulfomonile tiedjei DSM 6799 plasmid pDESTI.01, complete sequence	NC_018026.1	706587
RefSeq	Desulfosporosinus acidiphilus SJ4 plasmid pDESACI.01, complete sequence	NC_018066.1	646529
RefSeq	Desulfosporosinus acidiphilus SJ4 plasmid pDESACI.02, complete sequence	NC_018067.1	646529
RefSeq	Desulfosporosinus acidiphilus SJ4 chromosome, complete genome	NC_018068.1	646529
RefSeq	Desulfosporosinus meridiei DSM 13257 chromosome, complete genome	NC_018515.1	768704
RefSeq	Desulfosporosinus orientis DSM 765 chromosome, complete genome	NC_016584.1	768706
RefSeq	Desulfotalea psychrophila LSv54, complete genome	NC_006138.1	177439
RefSeq	Desulfotalea psychrophila LSv54 plasmid large, complete sequence	NC_006139.1	177439
RefSeq	Desulfotalea psychrophila LSv54 plasmid small, complete sequence	NC_006140.1	177439
RefSeq	Desulfotomaculum acetoxidans DSM 771 chromosome, complete genome	NC_013216.1	485916
RefSeq	Desulfotomaculum carboxydivorans CO-1-SRB chromosome, complete genome	NC_015565.1	868595
RefSeq	Desulfotomaculum gibsoniae DSM 7213, complete genome	NC_021184.1	767817
RefSeq	Desulfotomaculum kuznetsovii DSM 6115 chromosome, complete genome	NC_015573.1	760568
RefSeq	Desulfotomaculum reducens MI-1 chromosome, complete genome	NC_009253.1	349161
RefSeq	Desulfotomaculum ruminis DSM 2154 chromosome, complete genome	NC_015589.1	696281
RefSeq	Desulfovibrio aespoeensis Aspo-2 chromosome, complete genome	NC_014844.1	643562
RefSeq	Desulfovibrio africanus str. Walvis Bay chromosome, complete genome	NC_016629.1	690850
RefSeq	Desulfovibrio alaskensis G20 chromosome, complete genome	NC_007519.1	207559
RefSeq	Desulfovibrio desulfuricans subsp. desulfuricans str. ATCC 27774 chromosome, complete genome	NC_011883.1	525146
RefSeq	Desulfovibrio desulfuricans ND132 chromosome, complete genome	NC_016803.1	641491
RefSeq	Desulfovibrio gigas DSM 1382 = ATCC 19364 plasmid sequence	NC_022436.1	1121448
RefSeq	Desulfovibrio gigas DSM 1382 = ATCC 19364 genome	NC_022444.1	1121448
RefSeq	Desulfovibrio hydrothermalis AM13 = DSM 14728 plasmid DESAM_p, complete genome	NC_019953.1	1121451
RefSeq	Desulfovibrio hydrothermalis AM13 = DSM 14728 chromosome, complete genome	NC_020055.1	1121451
RefSeq	Desulfovibrio magneticus RS-1 plasmid pDMC2, complete sequence	NC_012795.1	573370
RefSeq	Desulfovibrio magneticus RS-1, complete genome	NC_012796.1	573370
RefSeq	Desulfovibrio magneticus RS-1 plasmid pDMC1, complete sequence	NC_012797.1	573370
RefSeq	Desulfovibrio piezophilus C1TLV30, complete genome	NC_020409.1	1322246
RefSeq	Desulfovibrio salexigens DSM 2638 chromosome, complete genome	NC_012881.1	526222
RefSeq	Desulfovibrio vulgaris DP4 plasmid pDVUL01, complete sequence	NC_008741.1	391774
RefSeq	Desulfovibrio vulgaris DP4 chromosome, complete genome	NC_008751.1	391774
RefSeq	Desulfovibrio vulgaris str. Hildenborough chromosome, complete genome	NC_002937.3	882
RefSeq	Desulfovibrio vulgaris str. Hildenborough plasmid pDV, complete sequence	NC_005863.1	882
RefSeq	Desulfovibrio vulgaris RCH1 chromosome, complete genome	NC_017310.1	573059
RefSeq	Desulfovibrio vulgaris RCH1 plasmid pDEVAL01, complete sequence	NC_017311.1	573059
RefSeq	Desulfovibrio vulgaris str. 'Miyazaki F' chromosome, complete genome	NC_011769.1	883
RefSeq	Desulfurispirillum indicum S5 chromosome, complete genome	NC_014836.1	653733
RefSeq	Desulfurivibrio alkaliphilus AHT2 chromosome, complete genome	NC_014216.1	589865
RefSeq	Desulfurobacterium thermolithotrophum DSM 11699 chromosome, complete genome	NC_015185.1	868864
RefSeq	Desulfurococcus fermentans DSM 16532 chromosome, complete genome	NC_018001.1	768672
RefSeq	Desulfurococcus kamchatkensis 1221n chromosome, complete genome	NC_011766.1	490899
RefSeq	Desulfurococcus mucosus DSM 2162 chromosome, complete genome	NC_014961.1	765177
RefSeq	Dichelobacter nodosus VCS1703A chromosome, complete genome	NC_009446.1	246195
RefSeq	Dickeya dadantii 3937 chromosome, complete genome	NC_014500.1	198628
RefSeq	Dickeya dadantii Ech586 chromosome, complete genome	NC_013592.1	590409
RefSeq	Dictyoglomus thermophilum H-6-12, complete genome	NC_011297.1	309799
RefSeq	Dictyoglomus turgidum DSM 6724 chromosome, complete genome	NC_011661.1	515635
RefSeq	Dinoroseobacter shibae DFL 12 chromosome, complete genome	NC_009952.1	398580
RefSeq	Dinoroseobacter shibae DFL 12 plasmid pDSHI01, complete sequence	NC_009955.1	398580
RefSeq	Dinoroseobacter shibae DFL 12 plasmid pDSHI02, complete sequence	NC_009956.1	398580
RefSeq	Dinoroseobacter shibae DFL 12 plasmid pDSHI03, complete sequence	NC_009957.1	398580
RefSeq	Dinoroseobacter shibae DFL 12 plasmid pDSHI04, complete sequence	NC_009958.1	398580
RefSeq	Dinoroseobacter shibae DFL 12 plasmid pDSHI05, complete sequence	NC_009959.1	398580
RefSeq	Dyadobacter fermentans DSM 18053 chromosome, complete genome	NC_013037.1	471854
RefSeq	Echinicola vietnamensis DSM 17526 chromosome, complete genome	NC_019904.1	926556
RefSeq	Spiribacter salinus M19-40, complete genome	NC_021291.1	1260251
RefSeq	Edwardsiella ictaluri 93-146 chromosome, complete genome	NC_012779.2	634503
RefSeq	Edwardsiella tarda C07-087, complete genome	NC_020796.1	1288122
RefSeq	Edwardsiella tarda EIB202 chromosome, complete genome	NC_013508.1	498217
RefSeq	Edwardsiella tarda EIB202 plasmid pEIB202, complete sequence	NC_013509.1	498217
RefSeq	Edwardsiella tarda FL6-60 chromosome, complete genome	NC_017309.1	718251
RefSeq	Edwardsiella tarda FL6-60 plasmid pFL6-60, complete sequence	NC_017318.1	718251
RefSeq	Eggerthella sp. YY7918, complete genome	NC_015738.1	502558
RefSeq	Eggerthella lenta DSM 2243 chromosome, complete genome	NC_013204.1	479437
RefSeq	Ehrlichia canis str. Jake chromosome, complete genome	NC_007354.1	269484
RefSeq	Ehrlichia chaffeensis str. Arkansas, complete genome	NC_007799.1	205920
RefSeq	Ehrlichia muris AS145, complete genome	NC_023063.1	1423892
RefSeq	Ehrlichia ruminantium str. Gardel, complete genome	NC_006831.1	302409
RefSeq	Ehrlichia ruminantium str. Welgevonden chromosome, complete genome	NC_005295.2	254945
RefSeq	Ehrlichia ruminantium str. Welgevonden, complete genome	NC_006832.1	254945
RefSeq	Elusimicrobium minutum Pei191 chromosome, complete genome	NC_010644.1	445932
RefSeq	Emticicia oligotrophica DSM 17448 plasmid pEMTOL01, complete sequence	NC_018742.1	929562
RefSeq	Emticicia oligotrophica DSM 17448 plasmid pEMTOL03, complete sequence	NC_018743.1	929562
RefSeq	Emticicia oligotrophica DSM 17448 plasmid pEMTOL04, complete sequence	NC_018744.1	929562
RefSeq	Emticicia oligotrophica DSM 17448 plasmid pEMTOL05, complete sequence	NC_018745.1	929562
RefSeq	Emticicia oligotrophica DSM 17448 chromosome, complete genome	NC_018748.1	929562
RefSeq	Emticicia oligotrophica DSM 17448 plasmid pEMTOL02, complete sequence	NC_018749.1	929562
RefSeq	Enterobacter sp. 638 plasmid pENTE01, complete sequence	NC_009425.1	399742
RefSeq	Enterobacter sp. 638, complete genome	NC_009436.1	399742
RefSeq	Enterobacter sp. R4-368 plasmid pENT01, complete sequence	NC_021492.1	1166130
RefSeq	Enterobacter sp. R4-368, complete genome	NC_021500.1	1166130
RefSeq	Enterobacter aerogenes EA1509E plasmid pEA1509_A, complete sequence	NC_020180.1	935296
RefSeq	Enterobacter aerogenes EA1509E, complete genome	NC_020181.1	935296
RefSeq	Enterobacter aerogenes EA1509E plasmid pEA1509_B	NC_020182.1	935296
RefSeq	Enterobacter aerogenes KCTC 2190 chromosome, complete genome	NC_015663.1	1028307
RefSeq	Enterobacter asburiae LF7a plasmid pENTAS01, complete sequence	NC_015963.1	640513
RefSeq	Enterobacter asburiae LF7a chromosome, complete genome	NC_015968.1	640513
RefSeq	Enterobacter asburiae LF7a plasmid pENTAS02, complete sequence	NC_015969.1	640513
RefSeq	Enterobacter cloacae subsp. cloacae ATCC 13047 plasmid pECL_A, complete sequence	NC_014107.1	716541
RefSeq	Enterobacter cloacae subsp. cloacae ATCC 13047 plasmid pECL_B, complete sequence	NC_014108.1	716541
RefSeq	Enterobacter cloacae subsp. cloacae ATCC 13047 chromosome, complete genome	NC_014121.1	716541
RefSeq	Enterobacter cloacae subsp. cloacae ENHKU01 chromosome, complete genome	NC_018405.1	1211025
RefSeq	Enterobacter cloacae EcWSU1 chromosome, complete genome	NC_016514.1	1045856
RefSeq	Enterobacter cloacae EcWSU1 plasmid pEcWSU1_A, complete sequence	NC_016515.1	1045856
RefSeq	Enterobacter cloacae SCF1 chromosome, complete genome	NC_014618.1	701347
RefSeq	Enterobacter cloacae subsp. dissolvens SDM chromosome, complete genome	NC_018079.1	1104326
RefSeq	Enterobacteriaceae bacterium strain FGI 57, complete genome	NC_020063.1	693444
RefSeq	Enterococcus casseliflavus EC20, complete genome	NC_020995.1	565655
RefSeq	Enterococcus phage EF62phi, complete genome	NC_017732.1	977801
RefSeq	Enterococcus faecalis D32 chromosome, complete genome	NC_018221.1	1206105
RefSeq	Enterococcus faecalis D32 plasmid EFD32pA, complete sequence	NC_018222.1	1206105
RefSeq	Enterococcus faecalis D32 plasmid EFD32pB, complete sequence	NC_018223.1	1206105
RefSeq	Enterococcus faecalis OG1RF chromosome, complete genome	NC_017316.1	474186
RefSeq	Enterococcus faecalis str. Symbioflor 1, complete genome	NC_019770.1	1261557
RefSeq	Enterococcus faecalis V583 chromosome, complete genome	NC_004668.1	226185
RefSeq	Enterococcus faecalis V583 plasmid pTEF1, complete sequence	NC_004669.1	226185
RefSeq	Enterococcus faecalis V583 plasmid pTEF3, complete sequence	NC_004670.1	226185
RefSeq	Enterococcus faecalis V583 plasmid pTEF2, complete sequence	NC_004671.1	226185
RefSeq	Enterococcus faecium Aus0004 chromosome, complete genome	NC_017022.1	1155766
RefSeq	Enterococcus faecium Aus0004 plasmid AUS0004_p2, complete sequence	NC_017023.1	1155766
RefSeq	Enterococcus faecium Aus0004 plasmid AUS0004_p3, complete sequence	NC_017024.1	1155766
RefSeq	Enterococcus faecium Aus0004 plasmid AUS0004_p1, complete sequence	NC_017032.1	1155766
RefSeq	Enterococcus faecium Aus0085 plasmid p1, complete sequence	NC_021987.1	1305849
RefSeq	Enterococcus faecium Aus0085 plasmid p3, complete sequence	NC_021988.1	1305849
RefSeq	Enterococcus faecium Aus0085 plasmid p4, complete sequence	NC_021989.1	1305849
RefSeq	Enterococcus faecium Aus0085 plasmid p6, complete sequence	NC_021990.1	1305849
RefSeq	Enterococcus faecium Aus0085, complete genome	NC_021994.1	1305849
RefSeq	Enterococcus faecium Aus0085 plasmid p2, complete sequence	NC_021995.1	1305849
RefSeq	Enterococcus faecium Aus0085 plasmid p5, complete sequence	NC_021996.1	1305849
RefSeq	Enterococcus faecium DO chromosome, complete genome	NC_017960.1	333849
RefSeq	Enterococcus faecium DO plasmid 1, complete sequence	NC_017961.1	333849
RefSeq	Enterococcus faecium DO plasmid 2, complete sequence	NC_017962.1	333849
RefSeq	Enterococcus faecium DO plasmid 3, complete sequence	NC_017963.1	333849
RefSeq	Enterococcus faecium NRRL B-2354, complete genome	NC_020207.1	1104325
RefSeq	Enterococcus faecium NRRL B-2354 plasmid pNB2354_1, complete sequence	NC_020208.1	1104325
RefSeq	Enterococcus hirae ATCC 9790 plasmid pTG9790, complete sequence	NC_015845.1	768486
RefSeq	Enterococcus hirae ATCC 9790 chromosome, complete genome	NC_018081.1	768486
RefSeq	Enterococcus mundtii QU 25 DNA, complete genome	NC_022878.1	1300150
RefSeq	Enterococcus mundtii QU 25 plasmid pQY182 DNA, complete genome	NC_022879.1	1300150
RefSeq	Enterococcus mundtii QU 25 plasmid pQY039 DNA, complete genome	NC_022880.1	1300150
RefSeq	Enterococcus mundtii QU 25 plasmid pQY003 DNA, complete genome	NC_022881.1	1300150
RefSeq	Enterococcus mundtii QU 25 plasmid pQY082 DNA, complete genome	NC_022883.1	1300150
RefSeq	Enterococcus mundtii QU 25 plasmid pQY024 DNA, complete genome	NC_022884.1	1300150
RefSeq	Erwinia sp. Ejp617 plasmid pJE01, complete sequence	NC_017442.1	215689
RefSeq	Erwinia sp. Ejp617 plasmid pJE03, complete sequence	NC_017443.1	215689
RefSeq	Erwinia sp. Ejp617 plasmid pJE05, complete sequence	NC_017444.1	215689
RefSeq	Erwinia sp. Ejp617 chromosome, complete genome	NC_017445.1	215689
RefSeq	Erwinia sp. Ejp617 plasmid pJE02, complete sequence	NC_017446.1	215689
RefSeq	Erwinia sp. Ejp617 plasmid pJE04, complete sequence	NC_017447.1	215689
RefSeq	Erwinia amylovora ATCC 49946 chromosome, complete genome	NC_013971.1	716540
RefSeq	Erwinia amylovora ATCC 49946 plasmid 1, complete sequence	NC_013972.1	716540
RefSeq	Erwinia amylovora ATCC 49946 plasmid 2, complete sequence	NC_013973.1	716540
RefSeq	Erwinia amylovora CFBP1430 plasmid pEA29, complete sequence	NC_013957.1	665029
RefSeq	Erwinia amylovora CFBP1430 chromosome, complete genome	NC_013961.1	665029
RefSeq	Erwinia billingiae Eb661 plasmid pEB102, complete sequence	NC_014304.1	634500
RefSeq	Erwinia billingiae Eb661 plasmid pEB170, complete sequence	NC_014305.1	634500
RefSeq	Erwinia billingiae Eb661 chromosome, complete genome	NC_014306.1	634500
RefSeq	Erwinia pyrifoliae DSM 12163 plasmid pEP3, complete sequence	NC_017388.1	644651
RefSeq	Erwinia pyrifoliae DSM 12163 plasmid pEp5, complete sequence	NC_017389.1	644651
RefSeq	Erwinia pyrifoliae DSM 12163, complete genome	NC_017390.1	644651
RefSeq	Erwinia pyrifoliae DSM 12163 plasmid pEP2.6, complete sequence	NC_017391.1	644651
RefSeq	Erwinia pyrifoliae DSM 12163 plasmid pEP36, complete sequence	NC_017392.1	644651
RefSeq	Erwinia pyrifoliae Ep1/96 chromosome, complete genome	NC_012214.1	634499
RefSeq	Erwinia pyrifoliae Ep1/96 plasmid pEP36, complete sequence	NC_013263.1	634499
RefSeq	Erwinia pyrifoliae Ep1/96 plasmid pEP03, complete sequence	NC_013264.1	634499
RefSeq	Erwinia pyrifoliae Ep1/96 plasmid pEP05, complete sequence	NC_013265.1	634499
RefSeq	Erwinia pyrifoliae Ep1/96 plasmid pEP2.6, complete sequence	NC_013954.1	634499
RefSeq	Erwinia tasmaniensis Et1/99 plasmid pET46, complete sequence	NC_010693.1	465817
RefSeq	Erwinia tasmaniensis Et1/99 chromosome, complete genome	NC_010694.1	465817
RefSeq	Erwinia tasmaniensis Et1/99 plasmid pET09, complete sequence	NC_010695.1	465817
RefSeq	Erwinia tasmaniensis Et1/99 plasmid pET35, complete sequence	NC_010696.1	465817
RefSeq	Erwinia tasmaniensis Et1/99 plasmid pET49, complete sequence	NC_010697.1	465817
RefSeq	Erwinia tasmaniensis Et1/99 plasmid pET45, complete sequence	NC_010699.1	465817
RefSeq	Erysipelothrix rhusiopathiae str. Fujisawa chromosome, complete genome	NC_015601.1	650150
RefSeq	Erysipelothrix rhusiopathiae SY1027, complete genome	NC_021354.1	1313290
RefSeq	Erythrobacter litoralis HTCC2594 chromosome, complete genome	NC_007722.1	314225
RefSeq	Escherichia blattae DSM 4481 chromosome, complete genome	NC_017910.1	630626
RefSeq	Escherichia coli 042, complete genome	NC_017626.1	216592
RefSeq	Escherichia coli 042 plasmid pAA, complete sequence	NC_017627.1	216592
RefSeq	Escherichia coli 536, complete genome	NC_008253.1	362663
RefSeq	Escherichia coli 55989 chromosome, complete genome	NC_011748.1	585055
RefSeq	Escherichia coli ABU 83972 plasmid pABU, complete sequence	NC_017629.1	655817
RefSeq	Escherichia coli ABU 83972 chromosome, complete genome	NC_017631.1	655817
RefSeq	Escherichia coli APEC O1 chromosome, complete genome	NC_008563.1	405955
RefSeq	Escherichia coli APEC O1 plasmid pAPEC-O1-ColBM, complete sequence	NC_009837.1	405955
RefSeq	Escherichia coli APEC O1 plasmid pAPEC-O1-R, complete sequence	NC_009838.1	405955
RefSeq	Escherichia coli APEC O78, complete genome	NC_020163.1	1274814
RefSeq	Escherichia coli ATCC 8739 chromosome, complete genome	NC_010468.1	481805
RefSeq	Escherichia coli BL21(DE3) chromosome, complete genome	NC_012971.2	469008
RefSeq	Escherichia coli BL21(DE3), complete genome	NC_012892.2	469008
RefSeq	Escherichia coli BW2952 chromosome, complete genome	NC_012759.1	595496
RefSeq	Escherichia coli B str. REL606 chromosome, complete genome	NC_012967.1	413997
RefSeq	Escherichia coli CFT073 chromosome, complete genome	NC_004431.1	199310
RefSeq	Escherichia coli DH1 chromosome, complete genome	NC_017625.1	536056
RefSeq	Escherichia coli DH1, complete genome	NC_017638.1	536056
RefSeq	Escherichia coli E24377A plasmid pETEC_80, complete sequence	NC_009786.1	331111
RefSeq	Escherichia coli E24377A plasmid pETEC_35, complete sequence	NC_009787.1	331111
RefSeq	Escherichia coli E24377A plasmid pETEC_73, complete sequence	NC_009788.1	331111
RefSeq	Escherichia coli E24377A plasmid pETEC_6, complete sequence	NC_009789.1	331111
RefSeq	Escherichia coli E24377A plasmid pETEC_74, complete sequence	NC_009790.1	331111
RefSeq	Escherichia coli E24377A plasmid pETEC_5, complete sequence	NC_009791.1	331111
RefSeq	Escherichia coli E24377A chromosome, complete genome	NC_009801.1	331111
RefSeq	Escherichia coli ED1a chromosome, complete genome	NC_011745.1	585397
RefSeq	Escherichia coli ETEC H10407, complete genome	NC_017633.1	316401
RefSeq	Escherichia coli ETEC H10407 plasmid p52, complete sequence	NC_017721.1	316401
RefSeq	Escherichia coli ETEC H10407 plasmid p666, complete sequence	NC_017722.1	316401
RefSeq	Escherichia coli ETEC H10407 plasmid p58, complete sequence	NC_017723.1	316401
RefSeq	Escherichia coli ETEC H10407 plasmid p948, complete sequence	NC_017724.1	316401
RefSeq	Escherichia coli HS, complete genome	NC_009800.1	331112
RefSeq	Escherichia coli IAI1 chromosome, complete genome	NC_011741.1	585034
RefSeq	Escherichia coli IAI39 chromosome, complete genome	NC_011750.1	585057
RefSeq	Escherichia coli IHE3034 chromosome, complete genome	NC_017628.1	714962
RefSeq	Escherichia coli JJ1886, complete genome	NC_022648.1	1355100
RefSeq	Escherichia coli JJ1886 plasmid pJJ1886_2, complete sequence	NC_022649.1	1355100
RefSeq	Escherichia coli JJ1886 plasmid pJJ1886_4, complete sequence	NC_022650.1	1355100
RefSeq	Escherichia coli JJ1886 plasmid pJJ1886_5, complete sequence	NC_022651.1	1355100
RefSeq	Escherichia coli JJ1886 plasmid pJJ1886_1, complete sequence	NC_022661.1	1355100
RefSeq	Escherichia coli JJ1886 plasmid pJJ1886_3, complete sequence	NC_022662.1	1355100
RefSeq	Escherichia coli KO11FL chromosome, complete genome	NC_017660.1	595495
RefSeq	Escherichia coli KO11FL plasmid pRK2, complete sequence	NC_017661.1	595495
RefSeq	Escherichia coli KO11FL chromosome, complete genome	NC_016902.1	595495
RefSeq	Escherichia coli KO11FL plasmid pEKO1102, complete sequence	NC_016903.1	595495
RefSeq	Escherichia coli KO11FL plasmid pEKO1101, complete sequence	NC_016904.1	595495
RefSeq	Escherichia coli str. K-12 substr. DH10B chromosome, complete genome	NC_010473.1	316385
RefSeq	Escherichia coli str. K-12 substr. MDS42 DNA, complete genome	NC_020518.1	1110693
RefSeq	Escherichia coli str. K-12 substr. MG1655, complete genome	NC_000913.3	511145
RefSeq	Escherichia coli str. K-12 substr. W3110, complete genome	NC_007779.1	316407
RefSeq	Escherichia coli LF82, complete genome	NC_011993.1	591946
RefSeq	Escherichia coli LY180, complete genome	NC_022364.1	1335916
RefSeq	Escherichia coli NA114 chromosome, complete genome	NC_017644.1	1033813
RefSeq	Escherichia coli O103:H2 str. 12009, complete genome	NC_013353.1	585395
RefSeq	Escherichia coli O103:H2 str. 12009 plasmid pO103, complete sequence	NC_013354.1	585395
RefSeq	Escherichia coli O104:H4 str. 2009EL-2050 chromosome, complete genome	NC_018650.1	1134782
RefSeq	Escherichia coli O104:H4 str. 2009EL-2050 plasmid p09EL50, complete sequence	NC_018651.1	1134782
RefSeq	Escherichia coli O104:H4 str. 2009EL-2050 plasmid pG-09EL50, complete sequence	NC_018652.1	1134782
RefSeq	Escherichia coli O104:H4 str. 2009EL-2050 plasmid pAA-09EL50, complete sequence	NC_018654.1	1134782
RefSeq	Escherichia coli O104:H4 str. 2009EL-2071 chromosome, complete genome	NC_018661.1	1133853
RefSeq	Escherichia coli O104:H4 str. 2009EL-2071 plasmid pAA-09EL71, complete sequence	NC_018662.1	1133853
RefSeq	Escherichia coli O104:H4 str. 2009EL-2071 plasmid pG-09EL71, complete sequence	NC_018663.1	1133853
RefSeq	Escherichia coli O104:H4 str. 2011C-3493 chromosome, complete genome	NC_018658.1	1133852
RefSeq	Escherichia coli O104:H4 str. 2011C-3493 plasmid pESBL-EA11, complete sequence	NC_018659.1	1133852
RefSeq	Escherichia coli O104:H4 str. 2011C-3493 plasmid pG-EA11, complete sequence	NC_018660.1	1133852
RefSeq	Escherichia coli O104:H4 str. 2011C-3493 plasmid pAA-EA11, complete sequence	NC_018666.1	1133852
RefSeq	Escherichia coli O111:H- str. 11128, complete genome	NC_013364.1	585396
RefSeq	Escherichia coli O111:H- str. 11128 plasmid pO111_1, complete sequence	NC_013365.1	585396
RefSeq	Escherichia coli O111:H- str. 11128 plasmid pO111_3, complete sequence	NC_013366.1	585396
RefSeq	Escherichia coli O111:H- str. 11128 plasmid pO111_4, complete sequence	NC_013367.1	585396
RefSeq	Escherichia coli O111:H- str. 11128 plasmid pO111_5, complete sequence	NC_013368.1	585396
RefSeq	Escherichia coli O111:H- str. 11128 plasmid pO111_2, complete sequence	NC_013370.1	585396
RefSeq	Escherichia coli O127:H6 str. E2348/69 chromosome, complete genome	NC_011601.1	574521
RefSeq	Escherichia coli O127:H6 str. E2348/69 plasmid pE2348-2, complete sequence	NC_011602.1	574521
[truncated: 4,206 more rows]
