# Supplementary material for: Bracken: estimating species abundance in metagenomics data
Source: PeerJ Comput Sci. Author manuscript; Available in PMC 2025 Apr 23. (PMC12016282; doi:10.7717/peerj-cs.104)
Supplement: Supplementary Table 4 [file NIHMS2071674-supplement-Supplementary_Table_4.xlsx]

## Sheet: Table1-SkinSample-SpeciesEst
Species Name	Exists in Prepared Sample	Kraken Assigned Reads	Redistributed Reads for Estimation	BRASS Estimated Reads	BRASS Estimated Fraction of Total Reads
Acinetobacter radioresistens	TRUE	11574480	37574	11612054	0.14849
Staphylococcus hominis	TRUE	10675573	227657	10903230	0.13943
Corynebacterium amycolatum	TRUE	9566003	19003	9585006	0.12257
Staphylococcus capitis	TRUE	8992784	90594	9083378	0.11615
Propionibacterium acnes	TRUE	8585085	20219	8605304	0.11004
Rhodococcus erythropolis	TRUE	8493987	20624	8514611	0.10888
Staphylococcus warneri	TRUE	6577061	417992	6995053	0.08945
Staphylococcus epidermidis	TRUE	6271832	310927	6582759	0.08418
Micrococcus luteus	TRUE	5678927	42474	5721401	0.07316
synthetic construct	FALSE	359702	25301	385003	0.00492
Staphylococcus aureus	FALSE	25611	59955	85566	0.00109
Staphylococcus haemolyticus	FALSE	29658	1237	30895	0.0004
Acinetobacter baumannii	FALSE	26939	1103	28042	0.00036
Staphylococcus pasteuri	FALSE	20643	3596	24239	0.00031
Corynebacterium resistens	FALSE	20545	253	20798	0.00027
Staphylococcus saprophyticus	FALSE	6648	64	6712	9e-05
Staphylococcus lugdunensis	FALSE	3464	119	3583	5e-05
Delftia acidovorans	FALSE	1655	25	1680	2e-05
Corynebacterium urealyticum	FALSE	1599	6	1605	2e-05
Lactobacillus reuteri	FALSE	1459	37	1496	2e-05
Candidatus Hamiltonella defensa	FALSE	1016	1	1017	1e-05
Enterococcus faecalis	FALSE	984	14	998	1e-05
Listeria monocytogenes	FALSE	894	6	900	1e-05
Bacillus subtilis	FALSE	643	118	761	1e-05
Staphylococcus carnosus	FALSE	689	2	691	1e-05
Staphylococcus pseudintermedius	FALSE	407	1	408	1e-05
Macrococcus caseolyticus	FALSE	269	1	270	0
Staphylococcus argenteus	FALSE	211	19	230	0
Gordonia bronchialis	FALSE	209	4	213	0
Prevotella dentalis	FALSE	191	2	193	0
Acinetobacter sp. ADP1	FALSE	127	0	127	0
Rhodococcus opacus	FALSE	123	2	125	0
Corynebacterium diphtheriae	FALSE	106	3	109	0
Corynebacterium callunae	FALSE	106	1	107	0
Bacillus megaterium	FALSE	106	0	106	0
Corynebacterium aurimucosum	FALSE	96	0	96	0
Kineococcus radiotolerans	FALSE	95	0	95	0
Bacillus thuringiensis	FALSE	80	9	89	0
Corynebacterium jeikeium	FALSE	77	2	79	0
Mycoplasma putrefaciens	FALSE	61	10	71	0
Escherichia coli	FALSE	17	53	70	0
Solibacillus silvestris	FALSE	64	0	64	0
Lactobacillus plantarum	FALSE	57	2	59	0
Clostridium botulinum	FALSE	19	37	56	0
Propionibacterium avidum	FALSE	52	0	52	0
Lysinibacillus sphaericus	FALSE	48	2	50	0
Thermobispora bispora	FALSE	46	0	46	0
Mahella australiensis	FALSE	15	25	40	0
Bacillus coagulans	FALSE	40	0	40	0
Bacillus amyloliquefaciens	FALSE	10	29	39	0
Moraxella catarrhalis	FALSE	38	0	38	0
Mycobacterium sp. MCS	FALSE	19	18	37	0
Bradyrhizobium sp. BTAi1	FALSE	26	10	36	0
Corynebacterium kroppenstedtii	FALSE	35	0	35	0
Bacillus cereus	FALSE	29	6	35	0
Amycolatopsis mediterranei	FALSE	34	0	34	0
Kocuria rhizophila	FALSE	30	0	30	0
Thermaerobacter marianensis	FALSE	27	1	28	0
Pseudomonas sp. TKP	FALSE	22	6	28	0
Candidatus Sulcia muelleri	FALSE	26	0	26	0
Streptomyces bingchenggensis	FALSE	13	12	25	0
Tetragenococcus halophilus	FALSE	25	0	25	0
Streptococcus pneumoniae	FALSE	19	5	24	0
Saccharomonospora viridis	FALSE	22	1	23	0
Lactobacillus delbrueckii	FALSE	21	1	22	0
Pseudarthrobacter phenanthrenivorans	FALSE	21	0	21	0
Geobacillus sp. GHH01	FALSE	11	9	20	0
Streptococcus dysgalactiae	FALSE	19	0	19	0
Rhodococcus jostii	FALSE	19	0	19	0
Carnobacterium maltaromaticum	FALSE	19	0	19	0
[Clostridium] stercorarium	FALSE	13	6	19	0
Desulfotomaculum acetoxidans	FALSE	12	6	18	0
secondary endosymbiont of Heteropsylla cubana	FALSE	18	0	18	0
Candidatus Portiera aleyrodidarum	FALSE	18	0	18	0
Gordonia polyisoprenivorans	FALSE	18	0	18	0
Desulfosporosinus orientis	FALSE	14	4	18	0
Amphibacillus xylanus	FALSE	18	0	18	0
Anaplasma phagocytophilum	FALSE	17	0	17	0
Acinetobacter oleivorans	FALSE	17	0	17	0
Aerococcus urinae	FALSE	16	0	16	0
Cellulosilyticum lentocellum	FALSE	11	5	16	0
Enterobacter aerogenes	FALSE	14	0	14	0
Psychromonas sp. CNPT3	FALSE	14	0	14	0
Rothia dentocariosa	FALSE	13	1	14	0
Lactobacillus kefiranofaciens	FALSE	13	1	14	0
Geobacillus sp. WCH70	FALSE	10	3	13	0
Propionibacterium acidipropionici	FALSE	13	0	13	0
Kytococcus sedentarius	FALSE	13	0	13	0
Streptococcus mutans	FALSE	12	0	12	0
Acinetobacter pittii	FALSE	12	0	12	0
Streptococcus pyogenes	FALSE	11	1	12	0
Geobacillus sp. JF8	FALSE	11	1	12	0
Sanguibacter keddieii	FALSE	12	0	12	0
Beutenbergia cavernae	FALSE	12	0	12	0
Taylorella equigenitalis	FALSE	12	0	12	0
Thermodesulfovibrio yellowstonii	FALSE	11	0	11	0
Oceanobacillus iheyensis	FALSE	11	0	11	0
Streptococcus salivarius	FALSE	10	0	10	0
Bacillus pumilus	FALSE	10	0	10	0
Variovorax paradoxus	FALSE	10	0	10	0
Xylanimonas cellulosilytica	FALSE	10	0	10	0
Propionibacterium freudenreichii	FALSE	10	0	10	0

## Sheet: SupplementaryTable4-GenusEst
Genus Name	Exists in Prepared Sample	Kraken Assigned Reads	Redistributed Reads for Estimation	BRACKEN Estimated Reads	BRACKEN Estimated Fraction of Total Reads
Staphylococcus	TRUE	33646053	88782	33734835	0.43338
Acinetobacter	TRUE	11635903	4426	11640329	0.14954
Corynebacterium	TRUE	9600993	6870	9607863	0.12343
Propionibacterium	TRUE	8601649	3739	8605388	0.11055
Rhodococcus	TRUE	8500082	15786	8515868	0.1094
Micrococcus	TRUE	5678927	48439	5727366	0.07358
Delftia	FALSE	1655	25	1680	2e-05
Lactobacillus	FALSE	1604	12	1616	2e-05
Bacillus	FALSE	1036	67	1103	1e-05
Candidatus Hamiltonella	FALSE	1016	19	1035	1e-05
Enterococcus	FALSE	993	18	1011	1e-05
Listeria	FALSE	900	4	904	1e-05
Mycoplasma	FALSE	661	5	666	1e-05
Macrococcus	FALSE	269	1	270	0
Gordonia	FALSE	234	0	234	0
Prevotella	FALSE	191	2	193	0
Escherichia	FALSE	17	120	137	0
Streptococcus	FALSE	104	6	110	0
Kineococcus	FALSE	95	0	95	0
Mycobacterium	FALSE	64	10	74	0
Solibacillus	FALSE	64	0	64	0
Geobacillus	FALSE	48	16	64	0
Clostridium	FALSE	26	35	61	0
Burkholderia	FALSE	34	25	59	0
Lysinibacillus	FALSE	48	1	49	0
Thermobispora	FALSE	46	0	46	0
Pseudomonas	FALSE	44	0	44	0
Mahella	FALSE	15	25	40	0
Nocardiopsis	FALSE	11	28	39	0
Amycolatopsis	FALSE	39	0	39	0
Streptomyces	FALSE	36	3	39	0
Moraxella	FALSE	38	0	38	0
Bradyrhizobium	FALSE	27	10	37	0
Kocuria	FALSE	30	0	30	0
Thermaerobacter	FALSE	27	1	28	0
Candidatus Sulcia	FALSE	26	0	26	0
Tetragenococcus	FALSE	25	0	25	0
Pseudarthrobacter	FALSE	23	0	23	0
Saccharomonospora	FALSE	22	0	22	0
Desulfosporosinus	FALSE	16	5	21	0
Carnobacterium	FALSE	19	0	19	0
Desulfotomaculum	FALSE	13	6	19	0
Ruminiclostridium	FALSE	13	6	19	0
Candidatus Portiera	FALSE	18	0	18	0
Amphibacillus	FALSE	18	0	18	0
Paenibacillus	FALSE	17	0	17	0
Exiguobacterium	FALSE	15	2	17	0
Enterobacter	FALSE	17	0	17	0
Cellulomonas	FALSE	17	0	17	0
Anaplasma	FALSE	17	0	17	0
Rothia	FALSE	16	0	16	0
Aerococcus	FALSE	16	0	16	0
Cellulosilyticum	FALSE	11	5	16	0
Dickeya	FALSE	16	0	16	0
Psychromonas	FALSE	14	0	14	0
Bifidobacterium	FALSE	14	0	14	0
Nocardia	FALSE	13	0	13	0
Kytococcus	FALSE	13	0	13	0
Frankia	FALSE	13	0	13	0
Francisella	FALSE	13	0	13	0
Sanguibacter	FALSE	12	0	12	0
Beutenbergia	FALSE	12	0	12	0
Taylorella	FALSE	12	0	12	0
Oceanobacillus	FALSE	11	0	11	0
Thermodesulfovibrio	FALSE	11	0	11	0
Variovorax	FALSE	10	0	10	0
Xylanimonas	FALSE	10	0	10	0
