# Supplementary material for: Bracken: estimating species abundance in metagenomics data
Source: PeerJ Comput Sci. Author manuscript; Available in PMC 2025 Apr 23. (PMC12016282; doi:10.7717/peerj-cs.104)
Supplement: Supplementary Table 5 [file NIHMS2071674-supplement-Supplementary_Table_5.xlsx]

## Sheet: Sheet1
Abundance Estimation Step	Number of Threads Used	Timing (H:MM:SS)	RAM Requirements	File(s) Generated	Space Required for File(s) Generated
1. Build Kraken Database	10	00:48:44	188.6 Gb	Kraken Database	52.5 Gb
2. Generate database.kraken	10	00:01:59	108.5 Gb	database.kraken	149 Mb
3. Generate database75mers.kraken_cnts	1	01:22:51	1.4 Gb	database75mers.kraken_cnts	148 Kb
4. Generate database75mers.distribution	1	00:00:01	27.8 Mb	75mer distribution file	92 Kb
5. Classify data with Kraken (data.kraken)	10	00:16:38	106.9 Gb	i100.kraken	1.6 Gb
6. Generate report file (data.report)	1	00:02:24	2.7 Gb	i100.report	96 Kb
7. Run Bracken (data.bracken)	1	00:00:01	34.6 Mb	i100.bracken	12 Kb
Steps 1-4 Total (run once per database)	10	2:13:35	188.6 Gb	Total	54.55 Gb
Steps 5-7 Total (run per dataset)	10	0:19:03	109.6 Gb
