# Supplementary material for: Bracken: estimating species abundance in metagenomics data
Source: PeerJ journal article supplement (doi:10.7717/peerj-cs.104), 2017-01-02
Supplement: Supplementary_Table_3.xlsx [file Supplementary_Table_3.xlsx]

## Sheet: ProgramAbundanceEstimation
						Reads added by BRACKEN
Name	TaxID	# of reads assigned by Kraken	Total # of reads added by BRACKEN	# of reads estimated by BRACKEN	True # of reads	from Mycobacterium	from M tb complex	from higher up
Mycobacterium sp. JLS	164757	325073	371120	696193	722880	370601	0	519.468
Mycobacterium avium	1764	308864	4493	313357	316134	3651.96	0	841.045
Mycobacterium marinum	1781	203097	229863	432960	431254	229780	0	83.1109
Mycobacterium tuberculosis	1773	9733	297059	306792	295147	386.21	296463	209.359
Mycobacterium bovis	1765	8965	247962	256927	288400	328.71	247453	180.58
Total						604747	543916
Other Mycobacterium Species						1586.7	6835.86
Mycobacterium	1763	606334
Mycobacterium tuberculosis complex	77643	550752
		855732
		2006229
		2053815

## Sheet: i100_halfplus5_report_M
All_Reads	Lvl_Reads	Taxonomy Lvl	Taxonomy ID	Classification		Reads from 1763	Reads from 77643
2019590	606334	G	1763	Mycobacterium	Mycobacterium
573381	550752	-	77643	Mycobacterium tuberculosis complex	Mycobacterium tuberculosis complex
9733	7387	S	1773	Mycobacterium tuberculosis	Mycobacterium tuberculosis
2106	2106	-	336982	Mycobacterium tuberculosis F11	Mycobacterium tuberculosis F11	342.546	263780
96	55	-	1306414	Mycobacterium tuberculosis EAI5	Mycobacterium tuberculosis EAI5	4.5275	3343.95
41	41	-	1310115	Mycobacterium tuberculosis EAI5/NITR206	Mycobacterium tuberculosis EAI5/NITR206	2.30014	1704.37
36	36	-	1306400	Mycobacterium tuberculosis str. Beijing/NITR203	Mycobacterium tuberculosis str. Beijing/NITR203	2.62795	1950.16
29	29	-	83331	Mycobacterium tuberculosis CDC1551	Mycobacterium tuberculosis CDC1551	2.35295	1779.72
15	15	-	443150	Mycobacterium tuberculosis CCDC5180	Mycobacterium tuberculosis CCDC5180	2.98096	2240.2
14	14	-	652616	Mycobacterium tuberculosis str. Erdman = ATCC 35801	Mycobacterium tuberculosis str. Erdman = ATCC 35801	3.16715	2364.55
13	13	-	1097669	Mycobacterium tuberculosis UT205	Mycobacterium tuberculosis UT205	2.49053	1820.53
7	7	-	443149	Mycobacterium tuberculosis CCDC5079	Mycobacterium tuberculosis CCDC5079	2.35971	1766.41
6	6	-	83332	Mycobacterium tuberculosis H37Rv	Mycobacterium tuberculosis H37Rv	7.34792	5542.42
6	6	-	707235	Mycobacterium tuberculosis CTRI-2	Mycobacterium tuberculosis CTRI-2	1.54104	1151
6	6	-	1138877	Mycobacterium tuberculosis 7199-99	Mycobacterium tuberculosis 7199-99	1.55902	1169.19
4	4	-	419947	Mycobacterium tuberculosis H37Ra	Mycobacterium tuberculosis H37Ra	3.26132	2472.84
3	3	-	395095	Mycobacterium tuberculosis str. Haarlem	Mycobacterium tuberculosis str. Haarlem	1.32873	993.122
3	3	-	478434	Mycobacterium tuberculosis KZN 1435	Mycobacterium tuberculosis KZN 1435	3.74152	2798.05
2	2	-	478435	Mycobacterium tuberculosis KZN 605	Mycobacterium tuberculosis KZN 605	2.0771	1586.7
8965	5825	S	1765	Mycobacterium bovis	Mycobacterium bovis
3119	3119	-	233413	Mycobacterium bovis AF2122/97	Mycobacterium bovis AF2122/97	322.954	243129
21	16	-	33892	Mycobacterium bovis BCG	Mycobacterium bovis BCG
3	3	-	561275	Mycobacterium bovis BCG str. Tokyo 172	Mycobacterium bovis BCG str. Tokyo 172	2.67343	2016.79
2	2	-	410289	Mycobacterium bovis BCG str. Pasteur 1173P2	Mycobacterium bovis BCG str. Pasteur 1173P2	3.08253	2306.76
325073	325073	S	164757	Mycobacterium sp. JLS	Mycobacterium sp. JLS	370601
309392	459	-	120793	Mycobacterium avium complex (MAC)	Mycobacterium avium complex (MAC)
308864	122353	S	1764	Mycobacterium avium	Mycobacterium avium
185951	176448	-	1770	Mycobacterium avium subsp. paratuberculosis	Mycobacterium avium subsp. paratuberculosis
9496	9496	-	262316	Mycobacterium avium subsp. paratuberculosis K-10	Mycobacterium avium subsp. paratuberculosis K-10	3637.07
7	7	-	1199187	Mycobacterium avium subsp. paratuberculosis MAP4	Mycobacterium avium subsp. paratuberculosis MAP4	11.4136
560	560	-	243243	Mycobacterium avium 104	Mycobacterium avium 104	3.46829
203097	0	S	1781	Mycobacterium marinum	Mycobacterium marinum
203097	203097	-	216594	Mycobacterium marinum M	Mycobacterium marinum M	229780
						604384
