# Supplementary material for: Bracken: estimating species abundance in metagenomics data
Source: PeerJ journal article supplement (doi:10.7717/peerj-cs.104), 2017-01-02
Supplement: Supplementary_Tables_2A_2B.xlsx [file Supplementary_Tables_2A_2B.xlsx]

## Sheet: Table2a-SmallDB-i100SpeciesEst
Species Name	True Read Count for i100 Data	Kraken Assigned Reads	Redistributed Reads for Estimation	BRACKEN Estimated Reads	BRACKEN Estimated Fraction of Total Reads	Error rate
Escherichia coli	1493685	717629	732184	1449813	0.05525	0.0293717
Bacillus cereus	1320777	1086754	202070	1288824	0.04912	0.0241926
Staphylococcus aureus	1231949	1192940	19301	1212241	0.0462	0.0159974
Rhodopseudomonas palustris	837761	823190	1106	824296	0.03141	0.0160726
Mycobacterium sp. JLS	722880	326114	373821	699935	0.02667	0.0317411
Burkholderia phymatum	667842	655478	1228	656706	0.02503	0.0166746
Rhodococcus jostii	632428	622004	310	622314	0.02372	0.0159923
Nostoc punctiforme	600242	590086	562	590648	0.02251	0.0159836
Pseudomonas putida	524454	511201	4777	515978	0.01966	0.0161616
Synechococcus elongatus	474268	466278	215	466493	0.01778	0.0163937
Bordetella bronchiseptica	466134	128479	327016	455495	0.01736	0.0228239
Burkholderia pseudomallei	464987	224374	228836	453210	0.01727	0.0253276
Anabaena variabilis	453815	433603	12868	446471	0.01701	0.0161828
Herpetosiphon aurantiacus	434161	427279	27	427306	0.01628	0.0157891
Sinorhizobium meliloti	431681	420783	3928	424711	0.01619	0.0161462
Mycobacterium marinum	431254	281340	152004	433344	0.01651	0.00484633
Clostridium beijerinckii	426880	418932	1011	419943	0.016	0.0162505
Psychrobacter cryohalolentis	424721	413504	4426	417930	0.01593	0.0159893
Lactococcus lactis	414349	404921	2772	407693	0.01554	0.0160638
Bacillus anthracis	408054	151306	277437	428743	0.01634	0.0507016
Bacteroides thetaiotaomicron	402214	392179	3490	395669	0.01508	0.0162724
Salmonella enterica	396534	387186	4916	392102	0.01494	0.0111768
Ochrobactrum anthropi	389096	381841	1054	382895	0.01459	0.0159369
Cyanothece sp. ATCC 51142	378402	372257	54	372311	0.01419	0.0160966
Alkaliphilus metalliredigens	374667	368065	432	368497	0.01404	0.016468
Bacillus thuringiensis	372187	187882	159705	347587	0.01325	0.0660958
Chromobacterium violaceum	336880	330985	434	331419	0.01263	0.0162105
Erwinia tasmaniensis	328615	322076	1182	323258	0.01232	0.0163018
Yersinia pestis	319921	61383	252873	314256	0.01198	0.0177075
Shewanella sp. MR-7	317467	224465	86579	311044	0.01185	0.020232
Mycobacterium avium	316134	310855	356	311211	0.01186	0.0155725
Cytophaga hutchinsonii	312400	307508	31	307539	0.01172	0.0155602
Prochlorococcus marinus	312374	307019	266	307285	0.01171	0.0162914
Pseudomonas stutzeri	300267	293151	1980	295131	0.01125	0.0171048
Sodalis glossinidius	298242	292996	614	293610	0.01119	0.015531
Mycobacterium tuberculosis	295147	20647	274350	294997	0.01124	0.000508221
Psychromonas ingrahamii	292400	287498	273	287771	0.01097	0.0158311
Mycobacterium bovis	288400	15035	264359	279394	0.01065	0.0312275
Clostridium botulinum	286907	281791	594	282385	0.01076	0.0157612
Bacillus clausii	286614	281618	346	281964	0.01075	0.0162239
Bacillus halodurans	274294	269485	450	269935	0.01029	0.0158917
Bacillus subtilis	272560	265462	2267	267729	0.0102	0.0177245
Hyphomonas neptunium	267334	262956	33	262989	0.01002	0.0162531
Ruminiclostridium thermocellum	264347	260096	100	260196	0.00992	0.0157028
Acinetobacter baumannii	262164	257301	727	258028	0.00983	0.0157764
Streptococcus pyogenes	260614	252007	4976	256983	0.00979	0.0139325
Geobacter sulfurreducens	248267	244079	217	244296	0.00931	0.0159949
Leptospira borgpetersenii	246934	242592	345	242937	0.00926	0.0161865
Corynebacterium efficiens	237814	233423	670	234093	0.00892	0.0156467
Thiobacillus denitrificans	230800	226889	122	227011	0.00865	0.0164168
Alkalilimnicola ehrlichii	230160	226337	74	226411	0.00863	0.0162887
Haloquadratum walsbyi	227734	223986	31	224017	0.00854	0.0163217
Clostridium novyi	215627	211808	388	212196	0.00809	0.0159117
Syntrophomonas wolfei	196934	193716	30	193746	0.00738	0.0161882
Idiomarina loihiensis	190800	187227	435	187662	0.00715	0.0164465
Treponema denticola	186640	183744	23	183767	0.007	0.0153933
Listeria welshimeri	183920	176044	4791	180835	0.00689	0.0167736
Streptococcus pneumoniae	181280	177347	1168	178515	0.0068	0.0152526
Corynebacterium urealyticum	174534	168078	3426	171504	0.00654	0.0173605
Streptococcus agalactiae	167414	159789	4251	164040	0.00625	0.0201536
Pelodictyon luteolum	161547	157283	1662	158945	0.00606	0.0161068
Campylobacter concisus	160562	157661	329	157990	0.00602	0.0160187
Lactobacillus delbrueckii	159494	153860	3163	157023	0.00598	0.0154927
Neisseria gonorrhoeae	156640	135601	16923	152524	0.00581	0.0262768
Neisseria meningitidis	155920	143635	11544	155179	0.00591	0.00475244
Thermus thermophilus	155202	152701	13	152714	0.00582	0.0160307
Lactobacillus salivarius	141868	139242	326	139568	0.00532	0.0162123
Histophilus somni	138774	136275	317	136592	0.00521	0.0157234
Coxiella burnetii	137654	135506	22	135528	0.00516	0.0154445
Thermosipho melanesiensis	130267	128132	53	128185	0.00489	0.0159826
Methanococcus maripaludis	123494	121232	302	121534	0.00463	0.0158712
Francisella tularensis	122854	120338	554	120892	0.00461	0.0159702
Haemophilus influenzae	120507	117883	629	118512	0.00452	0.0165551
Lawsonia intracellularis	116668	114759	23	114782	0.00437	0.0161655
Ignicoccus hospitalis	88827	87443	14	87457	0.00333	0.0154232
Borrelia bavariensis	81441	78122	1938	80060	0.00305	0.0169571
Chlamydia pneumoniae	79974	78615	83	78698	0.003	0.0159552
Chlamydophila caviae	75947	74403	340	74743	0.00285	0.0158532
Chlamydia trachomatis	73440	71933	284	72217	0.00275	0.0166531
Rickettsia prowazekii	73307	70541	1619	72160	0.00275	0.0156465
Wigglesworthia glossinidia	67361	66219	57	66276	0.00253	0.0161072
Candidatus Blochmannia pennsylvanicus	53307	52480	50	52530	0.002	0.0145759
Ureaplasma parvum	48374	47612	5	47617	0.00181	0.0156489
Cupriavidus necator	29627	29061	136	29197	0.00111	0.0145138
Buchnera aphidicola	26587	26192	14	26206	0.001	0.0143303
Shigella flexneri	0	1022	4135	5157	0.0002
Shigella boydii	0	1035	3475	4510	0.00017
Burkholderia mallei	0	193	3075	3268	0.00012
Shigella dysenteriae	0	1206	1447	2653	0.0001
Shigella sonnei	0	605	1923	2528	0.0001
Yersinia pseudotuberculosis	0	709	1324	2033	8e-05
Bacillus weihenstephanensis	0	1934	51	1985	8e-05
Bordetella parapertussis	0	348	1146	1494	6e-05
Bordetella pertussis	0	632	732	1364	5e-05
Burkholderia thailandensis	0	1133	49	1182	5e-05
Mycobacterium ulcerans	0	525	376	901	3e-05
Bacillus cytotoxicus	0	643	5	648	2e-05
Citrobacter koseri	0	576	17	593	2e-05
Shewanella sp. MR-4	0	336	137	473	2e-05
Shewanella sp. ANA-3	0	405	42	447	2e-05
Klebsiella pneumoniae	0	333	5	338	1e-05
Enterobacter sp. 638	0	290	1	291	1e-05
Mycobacterium sp. KMS	0	11	267	278	1e-05
Cronobacter sakazakii	0	270	3	273	1e-05
Nostoc sp. PCC 7120	0	247	7	254	1e-05
Mycobacterium vanbaalenii	0	244	4	248	1e-05
Mycobacterium gilvum	0	236	8	244	1e-05
Mycobacterium smegmatis	0	239	0	239	1e-05
Bordetella petrii	0	233	5	238	1e-05
Shewanella oneidensis	0	222	4	226	1e-05
Serratia proteamaculans	0	117	0	117	0
Shewanella baltica	0	108	1	109	0
Yersinia enterocolitica	0	101	0	101	0
Pectobacterium atrosepticum	0	96	0	96	0
Bordetella avium	0	81	0	81	0
Burkholderia cenocepacia	0	29	50	79	0
Mycobacterium abscessus	0	78	0	78	0
Psychrobacter arcticus	0	78	0	78	0
Staphylococcus epidermidis	0	53	2	55	0
Sinorhizobium medicae	0	54	0	54	0
Pseudomonas entomophila	0	52	0	52	0
Photorhabdus luminescens	0	51	0	51	0
Lysinibacillus sphaericus	0	47	0	47	0
Listeria monocytogenes	0	43	1	44	0
Pseudomonas aeruginosa	0	42	1	43	0
Rickettsia typhi	0	43	0	43	0
Borrelia afzelii	0	37	0	37	0
Borrelia burgdorferi	0	36	0	36	0
Burkholderia multivorans	0	30	5	35	0
Streptococcus thermophilus	0	34	0	34	0
Burkholderia xenovorans	0	34	0	34	0
Listeria innocua	0	33	1	34	0
Staphylococcus saprophyticus	0	34	0	34	0
Staphylococcus haemolyticus	0	33	0	33	0
Burkholderia vietnamiensis	0	26	5	31	0
Mycobacterium leprae	0	31	0	31	0
Burkholderia ambifaria	0	27	3	30	0
Streptococcus suis	0	22	1	23	0
Bacillus methylotrophicus	0	23	0	23	0
Shewanella frigidimarina	0	23	0	23	0
Pseudomonas fluorescens	0	21	1	22	0
Geobacillus thermodenitrificans	0	11	11	22	0
Streptococcus sanguinis	0	21	0	21	0
Corynebacterium jeikeium	0	20	0	20	0
Bacillus pumilus	0	20	0	20	0
Bradyrhizobium sp. ORS 278	0	14	5	19	0
Pseudomonas protegens	0	18	0	18	0
Burkholderia lata	0	16	2	18	0
Shewanella amazonensis	0	18	0	18	0
Shewanella denitrificans	0	17	0	17	0
Bradyrhizobium diazoefficiens	0	17	0	17	0
Clostridium perfringens	0	17	0	17	0
Clostridium tetani	0	16	0	16	0
Pseudomonas mendocina	0	14	1	15	0
Oceanobacillus iheyensis	0	15	0	15	0
Vibrio cholerae	0	10	4	14	0
Vibrio campbellii	0	11	3	14	0
Bacillus licheniformis	0	13	0	13	0
Pediococcus pentosaceus	0	13	0	13	0
Clostridium acetobutylicum	0	13	0	13	0
Nitrosococcus oceani	0	13	0	13	0
Leptospira interrogans	0	13	0	13	0
Photobacterium profundum	0	12	1	13	0
Cupriavidus taiwanensis	0	12	0	12	0
Lactobacillus helveticus	0	12	0	12	0
Pasteurella multocida	0	12	0	12	0
Shewanella sediminis	0	12	0	12	0
Lactobacillus casei	0	11	0	11	0
Acinetobacter sp. ADP1	0	11	0	11	0
Halorhodospira halophila	0	11	0	11	0
Streptococcus gordonii	0	10	0	10	0
Streptococcus mutans	0	10	0	10	0
Saccharopolyspora erythraea	0	10	0	10	0
Shewanella loihica	0	10	0	10	0
Lachnoclostridium phytofermentans	0	10	0	10	0

## Sheet: Table2-LargeDB-i100SpeciesEst
Species Name	True Read Count for i100 Data	Kraken Assigned Reads	Redistributed Reads for Estimation	BRASS Estimated Reads	BRASS Estimated Fraction of Total Reads	Error rate
Escherichia coli	1493685	685659	771723	1457382	0.05554	0.0243043
Bacillus cereus	1320777	683759	610623	1294382	0.04933	0.0199844
Staphylococcus aureus	1231949	1160633	50515	1211148	0.04616	0.0168846
Rhodopseudomonas palustris	837761	822673	1454	824127	0.03141	0.0162743
Mycobacterium sp. JLS	722880	325073	371120	696193	0.02653	0.0369176
Burkholderia phymatum	667842	643695	11484	655179	0.02497	0.0189611
Rhodococcus jostii	632428	614430	7575	622005	0.0237	0.0164809
Nostoc punctiforme	600242	589380	1118	590498	0.0225	0.0162335
Pseudomonas putida	524454	501664	13619	515283	0.01964	0.0174868
Synechococcus elongatus	474268	465944	391	466335	0.01777	0.0167268
Bordetella bronchiseptica	466134	89675	362335	452010	0.01723	0.0303003
Burkholderia pseudomallei	464987	220991	232517	453508	0.01728	0.0246867
Anabaena variabilis	453815	432991	13497	446488	0.01702	0.0161453
Herpetosiphon aurantiacus	434161	427270	25	427295	0.01628	0.0158144
Sinorhizobium meliloti	431681	419621	5322	424943	0.01619	0.0156087
Mycobacterium marinum	431254	203097	229863	432960	0.0165	0.00395591
Clostridium beijerinckii	426880	416712	2880	419592	0.01599	0.0170727
Psychrobacter cryohalolentis	424721	330005	87099	417104	0.0159	0.0179341
Lactococcus lactis	414349	399509	8111	407620	0.01553	0.0162399
Bacillus anthracis	408054	95680	316091	411771	0.01569	0.00910909
Bacteroides thetaiotaomicron	402214	389304	6364	395668	0.01508	0.0162749
Salmonella enterica	396534	378089	11411	389500	0.01484	0.0177387
Ochrobactrum anthropi	389096	381193	1478	382671	0.01458	0.0165126
Cyanothece sp. ATCC 51142	378402	372144	172	372316	0.01419	0.0160834
Alkaliphilus metalliredigens	374667	367918	439	368357	0.01404	0.0168416
Bacillus thuringiensis	372187	58768	297146	355914	0.01356	0.0437226
Chromobacterium violaceum	336880	330235	1072	331307	0.01263	0.016543
Erwinia tasmaniensis	328615	318564	3668	322232	0.01228	0.0194239
Yersinia pestis	319921	59601	250871	310472	0.01183	0.0295354
Shewanella sp. MR-7	317467	224302	86613	310915	0.01185	0.0206384
Mycobacterium avium	316134	308864	4493	313357	0.01194	0.00878425
Cytophaga hutchinsonii	312400	307445	68	307513	0.01172	0.0156434
Prochlorococcus marinus	312374	307000	263	307263	0.01171	0.0163618
Pseudomonas stutzeri	300267	292464	2967	295431	0.01126	0.0161057
Sodalis glossinidius	298242	292551	580	293131	0.01117	0.0171371
Mycobacterium tuberculosis	295147	9733	297059	306792	0.01169	0.0394549
Psychromonas ingrahamii	292400	286820	865	287685	0.01096	0.0161252
Mycobacterium bovis	288400	8965	247962	256927	0.00979	0.10913
Clostridium botulinum	286907	281741	795	282536	0.01077	0.0152349
Bacillus clausii	286614	281468	297	281765	0.01074	0.0169182
Bacillus halodurans	274294	269105	447	269552	0.01027	0.017288
Bacillus subtilis	272560	249043	20680	269723	0.01028	0.0104087
Hyphomonas neptunium	267334	262927	44	262971	0.01002	0.0163204
Ruminiclostridium thermocellum	264347	253507	6045	259552	0.00989	0.018139
Acinetobacter baumannii	262164	253488	4507	257995	0.00983	0.0159023
Streptococcus pyogenes	260614	220640	35437	256077	0.00976	0.0174089
Geobacter sulfurreducens	248267	244049	239	244288	0.00931	0.0160271
Leptospira borgpetersenii	246934	242590	337	242927	0.00926	0.016227
Corynebacterium efficiens	237814	233032	915	233947	0.00892	0.0162606
Thiobacillus denitrificans	230800	226673	255	226928	0.00865	0.0167764
Alkalilimnicola ehrlichii	230160	226263	116	226379	0.00863	0.0164277
Haloquadratum walsbyi	227734	223967	60	224027	0.00854	0.0162778
Clostridium novyi	215627	210240	1887	212127	0.00808	0.0162317
Syntrophomonas wolfei	196934	193644	81	193725	0.00738	0.0162948
Idiomarina loihiensis	190800	187153	1064	188217	0.00717	0.0135377
Treponema denticola	186640	183562	192	183754	0.007	0.0154629
Listeria welshimeri	183920	174825	5676	180501	0.00688	0.0185896
Streptococcus pneumoniae	181280	157758	22159	179917	0.00686	0.00751876
Corynebacterium urealyticum	174534	167457	3833	171290	0.00653	0.0185866
Streptococcus agalactiae	167414	154724	6992	161716	0.00616	0.0340354
Pelodictyon luteolum	161547	157233	1712	158945	0.00606	0.0161068
Campylobacter concisus	160562	157610	366	157976	0.00602	0.0161059
Lactobacillus delbrueckii	159494	152799	4039	156838	0.00598	0.0166527
Neisseria gonorrhoeae	156640	128050	22221	150271	0.00573	0.0406601
Neisseria meningitidis	155920	135719	21652	157371	0.006	0.00930605
Thermus thermophilus	155202	151808	806	152614	0.00582	0.016675
Lactobacillus salivarius	141868	138569	1045	139614	0.00532	0.015888
Histophilus somni	138774	136193	369	136562	0.0052	0.0159396
Coxiella burnetii	137654	135501	37	135538	0.00517	0.0153719
Thermosipho melanesiensis	130267	127880	294	128174	0.00488	0.016067
Methanococcus maripaludis	123494	121174	358	121532	0.00463	0.0158874
Francisella tularensis	122854	120050	829	120879	0.00461	0.016076
Haemophilus influenzae	120507	117514	986	118500	0.00452	0.0166546
Lawsonia intracellularis	116668	114756	50	114806	0.00438	0.0159598
Ignicoccus hospitalis	88827	87434	18	87452	0.00333	0.0154795
Borreliella bavariensis	81441	62276	17370	79646	0.00304	0.0220405
Chlamydia pneumoniae	79974	78607	68	78675	0.003	0.0162428
Chlamydophila caviae	75947	74364	313	74677	0.00285	0.0167222
Chlamydia trachomatis	73440	71929	428	72357	0.00276	0.0147467
Rickettsia prowazekii	73307	70486	1680	72166	0.00275	0.0155647
Wigglesworthia glossinidia	67361	66214	57	66271	0.00253	0.0161815
Candidatus Blochmannia pennsylvanicus	53307	43524	8894	52418	0.002	0.016677
Ureaplasma parvum	48374	45018	2584	47602	0.00181	0.015959
Cupriavidus necator	29627	28887	436	29323	0.00112	0.0102609
Buchnera aphidicola	26587	26181	18	26199	0.001	0.0145936
Mycobacterium canettii	0	3869	4781	8650	0.00033	#DIV/0!
Shigella flexneri	0	930	3990	4920	0.00019	#DIV/0!
Bordetella pertussis	0	420	3273	3693	0.00014	#DIV/0!
Burkholderia mallei	0	161	3323	3484	0.00013	#DIV/0!
Shigella boydii	0	876	2133	3009	0.00011	#DIV/0!
Bordetella parapertussis	0	534	2122	2656	0.0001	#DIV/0!
Bacillus weihenstephanensis	0	2382	112	2494	0.0001	#DIV/0!
Mycobacterium africanum	0	62	2073	2135	8e-05	#DIV/0!
Yersinia pseudotuberculosis	0	744	1388	2132	8e-05	#DIV/0!
Shigella sonnei	0	537	1434	1971	8e-05	#DIV/0!
Burkholderia thailandensis	0	1777	73	1850	7e-05	#DIV/0!
Shigella dysenteriae	0	980	756	1736	7e-05	#DIV/0!
Escherichia fergusonii	0	1282	142	1424	5e-05	#DIV/0!
Mycobacterium ulcerans	0	377	690	1067	4e-05	#DIV/0!
Mycobacterium liflandii	0	252	741	993	4e-05	#DIV/0!
Bacillus toyonensis	0	442	504	946	4e-05	#DIV/0!
Bacillus cytotoxicus	0	800	6	806	3e-05	#DIV/0!
Psychrobacter sp. G	0	480	129	609	2e-05	#DIV/0!
Enterobacter cloacae	0	487	61	548	2e-05	#DIV/0!
Bacillus amyloliquefaciens	0	31	463	494	2e-05	#DIV/0!
Shewanella sp. MR-4	0	335	137	472	2e-05	#DIV/0!
Shewanella sp. ANA-3	0	405	44	449	2e-05	#DIV/0!
Citrobacter koseri	0	373	25	398	2e-05	#DIV/0!
Citrobacter rodentium	0	373	18	391	1e-05	#DIV/0!
Klebsiella pneumoniae	0	227	134	361	1e-05	#DIV/0!
Enterobacteriaceae bacterium strain FGI 57	0	337	4	341	1e-05	#DIV/0!
Psychrobacter arcticus	0	331	4	335	1e-05	#DIV/0!
Listeria monocytogenes	0	118	194	312	1e-05	#DIV/0!
Salmonella bongori	0	288	4	292	1e-05	#DIV/0!
Streptococcus dysgalactiae	0	191	83	274	1e-05	#DIV/0!
Nostoc sp. PCC 7120	0	246	7	253	1e-05	#DIV/0!
Cronobacter sakazakii	0	186	53	239	1e-05	#DIV/0!
Staphylococcus argenteus	0	219	9	228	1e-05	#DIV/0!
Mycobacterium chubuense	0	227	0	227	1e-05	#DIV/0!
Mycobacterium gilvum	0	221	6	227	1e-05	#DIV/0!
Shewanella oneidensis	0	220	5	225	1e-05	#DIV/0!
Neisseria lactamica	0	199	25	224	1e-05	#DIV/0!
Mycobacterium vanbaalenii	0	209	4	213	1e-05	#DIV/0!
Mycobacterium smegmatis	0	210	0	210	1e-05	#DIV/0!
Bordetella petrii	0	202	7	209	1e-05	#DIV/0!
Enterobacter sp. R4-368	0	199	8	207	1e-05	#DIV/0!
Mycobacterium rhodesiae	0	203	1	204	1e-05	#DIV/0!
Enterobacter lignolyticus	0	195	8	203	1e-05	#DIV/0!
Mycobacterium kansasii	0	200	0	200	1e-05	#DIV/0!
Bacillus sp. JS	0	176	9	185	1e-05	#DIV/0!
Enterobacter asburiae	0	147	31	178	1e-05	#DIV/0!
Borreliella garinii	0	139	37	176	1e-05	#DIV/0!
Enterobacter aerogenes	0	162	8	170	1e-05	#DIV/0!
Klebsiella oxytoca	0	166	2	168	1e-05	#DIV/0!
Enterobacter sp. 638	0	147	17	164	1e-05	#DIV/0!
Rhodococcus opacus	0	157	2	159	1e-05	#DIV/0!
Mycobacterium sp. JS623	0	152	0	152	1e-05	#DIV/0!
Raoultella ornithinolytica	0	147	1	148	1e-05	#DIV/0!
synthetic construct	0	121	23	144	1e-05	#DIV/0!
Shimwellia blattae	0	138	0	138	1e-05	#DIV/0!
Serratia marcescens	0	127	5	132	1e-05	#DIV/0!
Borreliella afzelii	0	128	2	130	0	#DIV/0!
Yersinia enterocolitica	0	128	1	129	0	#DIV/0!
Shewanella baltica	0	126	1	127	0	#DIV/0!
Streptococcus constellatus	0	15	109	124	0	#DIV/0!
Streptococcus suis	0	100	19	119	0	#DIV/0!
Mycobacterium sinense	0	118	0	118	0	#DIV/0!
Rahnella aquatilis	0	57	59	116	0	#DIV/0!
Mycobacterium intracellulare	0	34	78	112	0	#DIV/0!
Borreliella burgdorferi	0	105	6	111	0	#DIV/0!
Erwinia pyrifoliae	0	24	82	106	0	#DIV/0!
Cronobacter turicensis	0	71	35	106	0	#DIV/0!
Streptococcus mitis	0	97	6	103	0	#DIV/0!
Streptococcus pseudopneumoniae	0	88	13	101	0	#DIV/0!
Pectobacterium carotovorum	0	89	4	93	0	#DIV/0!
Mycobacterium abscessus	0	89	0	89	0	#DIV/0!
Candidatus Blochmannia chromaiodes	0	71	17	88	0	#DIV/0!
Streptococcus thermophilus	0	71	15	86	0	#DIV/0!
Serratia plymuthica	0	33	53	86	0	#DIV/0!
Plautia stali symbiont	0	86	0	86	0	#DIV/0!
Pantoea sp. At-9b	0	82	3	85	0	#DIV/0!
Staphylococcus epidermidis	0	72	5	77	0	#DIV/0!
Erwinia billingiae	0	76	0	76	0	#DIV/0!
Bordetella avium	0	72	0	72	0	#DIV/0!
Sinorhizobium fredii	0	70	0	70	0	#DIV/0!
Erwinia sp. Ejp617	0	44	26	70	0	#DIV/0!
Burkholderia cenocepacia	0	40	29	69	0	#DIV/0!
Borreliella bissettii	0	66	2	68	0	#DIV/0!
Edwardsiella tarda	0	11	54	65	0	#DIV/0!
Burkholderia phenoliruptrix	0	43	22	65	0	#DIV/0!
Pantoea vagans	0	60	5	65	0	#DIV/0!
Mycobacterium yongonense	0	28	33	61	0	#DIV/0!
Pectobacterium sp. SCC3193	0	12	48	60	0	#DIV/0!
Serratia proteamaculans	0	46	12	58	0	#DIV/0!
Pantoea ananatis	0	54	2	56	0	#DIV/0!
Erwinia amylovora	0	47	7	54	0	#DIV/0!
Klebsiella variicola	0	26	27	53	0	#DIV/0!
Sinorhizobium medicae	0	51	0	51	0	#DIV/0!
Morganella morganii	0	51	0	51	0	#DIV/0!
Mycobacterium sp. MOTT36Y	0	14	36	50	0	#DIV/0!
Photorhabdus asymbiotica	0	43	6	49	0	#DIV/0!
Staphylococcus pseudintermedius	0	49	0	49	0	#DIV/0!
Staphylococcus carnosus	0	49	0	49	0	#DIV/0!
Staphylococcus haemolyticus	0	48	1	49	0	#DIV/0!
Pseudomonas entomophila	0	47	1	48	0	#DIV/0!
Staphylococcus lugdunensis	0	46	1	47	0	#DIV/0!
Dickeya zeae	0	41	6	47	0	#DIV/0!
Streptococcus oralis	0	45	1	46	0	#DIV/0!
Dickeya dadantii	0	39	6	45	0	#DIV/0!
Bacillus atrophaeus	0	45	0	45	0	#DIV/0!
Rickettsia typhi	0	44	0	44	0	#DIV/0!
Vibrio cholerae	0	34	9	43	0	#DIV/0!
Staphylococcus saprophyticus	0	42	0	42	0	#DIV/0!
Nostoc sp. PCC 7524	0	42	0	42	0	#DIV/0!
Serratia liquefaciens	0	33	9	42	0	#DIV/0!
Pseudomonas aeruginosa	0	36	5	41	0	#DIV/0!
Pseudomonas fluorescens	0	34	1	35	0	#DIV/0!
Pectobacterium atrosepticum	0	33	2	35	0	#DIV/0!
Lysinibacillus sphaericus	0	33	0	33	0	#DIV/0!
Pseudomonas sp. VLB120	0	32	1	33	0	#DIV/0!
Nostoc sp. PCC 7107	0	32	0	32	0	#DIV/0!
Bacillus megaterium	0	32	0	32	0	#DIV/0!
Mycobacterium leprae	0	32	0	32	0	#DIV/0!
Xenorhabdus nematophila	0	29	2	31	0	#DIV/0!
Streptococcus macedonicus	0	25	5	30	0	#DIV/0!
Listeria innocua	0	28	2	30	0	#DIV/0!
Burkholderia glumae	0	29	0	29	0	#DIV/0!
Geobacillus sp. GHH01	0	12	17	29	0	#DIV/0!
Providencia stuartii	0	29	0	29	0	#DIV/0!
Bradyrhizobium diazoefficiens	0	13	16	29	0	#DIV/0!
Staphylococcus capitis	0	29	0	29	0	#DIV/0!
Achromobacter xylosoxidans	0	29	0	29	0	#DIV/0!
Rhodococcus erythropolis	0	28	0	28	0	#DIV/0!
Proteus mirabilis	0	28	0	28	0	#DIV/0!
Solibacillus silvestris	0	28	0	28	0	#DIV/0!
Lactobacillus helveticus	0	23	5	28	0	#DIV/0!
Acinetobacter pittii	0	26	1	27	0	#DIV/0!
Shewanella putrefaciens	0	12	15	27	0	#DIV/0!
Edwardsiella ictaluri	0	27	0	27	0	#DIV/0!
Staphylococcus warneri	0	26	1	27	0	#DIV/0!
Acinetobacter oleivorans	0	27	0	27	0	#DIV/0!
Bacillus methylotrophicus	0	18	8	26	0	#DIV/0!
Burkholderia sp. CCGE1002	0	26	0	26	0	#DIV/0!
Burkholderia gladioli	0	26	0	26	0	#DIV/0!
Streptococcus sanguinis	0	25	0	25	0	#DIV/0!
Bacillus pumilus	0	25	0	25	0	#DIV/0!
Pseudomonas mendocina	0	25	0	25	0	#DIV/0!
Candidatus Moranella endobia	0	25	0	25	0	#DIV/0!
Bacillus coagulans	0	24	0	24	0	#DIV/0!
Burkholderia ambifaria	0	22	2	24	0	#DIV/0!
Listeria ivanovii	0	24	0	24	0	#DIV/0!
Burkholderia multivorans	0	22	2	24	0	#DIV/0!
secondary endosymbiont of Ctenarytaina eucalypti	0	24	0	24	0	#DIV/0!
Clostridium tetani	0	24	0	24	0	#DIV/0!
Candidatus Pantoea carbekii	0	24	0	24	0	#DIV/0!
Clostridium saccharoperbutylacetonicum	0	23	0	23	0	#DIV/0!
Streptococcus infantarius	0	21	2	23	0	#DIV/0!
Xenorhabdus bovienii	0	21	2	23	0	#DIV/0!
Pseudomonas resinovorans	0	22	0	22	0	#DIV/0!
Streptococcus equi	0	22	0	22	0	#DIV/0!
Streptococcus parauberis	0	22	0	22	0	#DIV/0!
Aeromonas hydrophila	0	12	10	22	0	#DIV/0!
Shewanella frigidimarina	0	21	0	21	0	#DIV/0!
Burkholderia xenovorans	0	21	0	21	0	#DIV/0!
Listeria seeligeri	0	21	0	21	0	#DIV/0!
Candidatus Carsonella ruddii	0	21	0	21	0	#DIV/0!
Burkholderia sp. YI23	0	20	0	20	0	#DIV/0!
Azotobacter vinelandii	0	20	0	20	0	#DIV/0!
secondary endosymbiont of Heteropsylla cubana	0	19	0	19	0	#DIV/0!
Corynebacterium jeikeium	0	19	0	19	0	#DIV/0!
Carnobacterium maltaromaticum	0	16	3	19	0	#DIV/0!
Simiduia agarivorans	0	13	5	18	0	#DIV/0!
Clostridium perfringens	0	18	0	18	0	#DIV/0!
Staphylococcus hominis	0	18	0	18	0	#DIV/0!
Shewanella amazonensis	0	17	0	17	0	#DIV/0!
Shewanella denitrificans	0	17	0	17	0	#DIV/0!
Methylophaga frappieri	0	13	4	17	0	#DIV/0!
Burkholderia cepacia	0	15	2	17	0	#DIV/0!
Psychrobacter sp. PRwf-1	0	17	0	17	0	#DIV/0!
Photorhabdus luminescens	0	16	1	17	0	#DIV/0!
Streptococcus salivarius	0	16	0	16	0	#DIV/0!
Streptococcus mutans	0	16	0	16	0	#DIV/0!
Rhodococcus equi	0	16	0	16	0	#DIV/0!
Peptoclostridium difficile	0	15	1	16	0	#DIV/0!
Clostridium saccharobutylicum	0	16	0	16	0	#DIV/0!
Pseudomonas sp. UW4	0	16	0	16	0	#DIV/0!
Ureaplasma urealyticum	0	16	0	16	0	#DIV/0!
Pseudomonas protegens	0	15	0	15	0	#DIV/0!
Burkholderia lata	0	14	1	15	0	#DIV/0!
Streptococcus anginosus	0	15	0	15	0	#DIV/0!
Burkholderia sp. CCGE1003	0	15	0	15	0	#DIV/0!
Vibrio campbellii	0	12	3	15	0	#DIV/0!
Streptococcus oligofermentans	0	15	0	15	0	#DIV/0!
Cylindrospermum stagnale	0	15	0	15	0	#DIV/0!
Burkholderia sp. RPE64	0	15	0	15	0	#DIV/0!
Streptococcus sp. I-P16	0	10	4	14	0	#DIV/0!
Candidatus Baumannia cicadellinicola	0	14	0	14	0	#DIV/0!
Streptococcus intermedius	0	14	0	14	0	#DIV/0!
Streptococcus uberis	0	14	0	14	0	#DIV/0!
Rhizobium leguminosarum	0	13	1	14	0	#DIV/0!
Streptococcus pasteurianus	0	12	2	14	0	#DIV/0!
Halomonas elongata	0	12	2	14	0	#DIV/0!
Candidatus Hamiltonella defensa	0	14	0	14	0	#DIV/0!
Lactobacillus acidophilus	0	12	2	14	0	#DIV/0!
Anoxybacillus flavithermus	0	13	0	13	0	#DIV/0!
Heliobacterium modesticaldum	0	13	0	13	0	#DIV/0!
Laribacter hongkongensis	0	13	0	13	0	#DIV/0!
Aggregatibacter actinomycetemcomitans	0	10	3	13	0	#DIV/0!
Streptococcus parasanguinis	0	13	0	13	0	#DIV/0!
Ralstonia solanacearum	0	12	1	13	0	#DIV/0!
Rhizobium etli	0	11	2	13	0	#DIV/0!
Enterococcus faecium	0	12	1	13	0	#DIV/0!
Leptospira interrogans	0	13	0	13	0	#DIV/0!
Streptococcus gordonii	0	12	0	12	0	#DIV/0!
Clostridium cellulovorans	0	12	0	12	0	#DIV/0!
Mahella australiensis	0	10	2	12	0	#DIV/0!
Clostridium kluyveri	0	12	0	12	0	#DIV/0!
Burkholderia rhizoxinica	0	12	0	12	0	#DIV/0!
Burkholderia phytofirmans	0	12	0	12	0	#DIV/0!
Halobacillus halophilus	0	12	0	12	0	#DIV/0!
Calothrix sp. PCC 7507	0	11	0	11	0	#DIV/0!
Azospirillum brasilense	0	10	1	11	0	#DIV/0!
Methylomicrobium alcaliphilum	0	10	1	11	0	#DIV/0!
Bradyrhizobium sp. ORS 278	0	10	1	11	0	#DIV/0!
Bacillus cellulosilyticus	0	11	0	11	0	#DIV/0!
Photobacterium profundum	0	11	0	11	0	#DIV/0!
Bacillus sp. 1NLA3E	0	11	0	11	0	#DIV/0!
Shewanella loihica	0	11	0	11	0	#DIV/0!
Shewanella piezotolerans	0	11	0	11	0	#DIV/0!
Pasteurella multocida	0	11	0	11	0	#DIV/0!
Lactobacillus kefiranofaciens	0	11	0	11	0	#DIV/0!
Shewanella sediminis	0	11	0	11	0	#DIV/0!
Lactococcus garvieae	0	10	1	11	0	#DIV/0!
Aerococcus urinae	0	10	0	10	0	#DIV/0!
Bacillus infantis	0	10	0	10	0	#DIV/0!
Acinetobacter radioresistens	0	10	0	10	0	#DIV/0!
Geobacillus thermodenitrificans	0	10	0	10	0	#DIV/0!
Psychromonas sp. CNPT3	0	10	0	10	0	#DIV/0!
Cellulosilyticum lentocellum	0	10	0	10	0	#DIV/0!
Lactobacillus ruminis	0	10	0	10	0	#DIV/0!
Clostridium acetobutylicum	0	10	0	10	0	#DIV/0!
Cupriavidus taiwanensis	0	10	0	10	0	#DIV/0!
